# Supplementary material for: Catalyst-free coupling of peroxypyrroloindolenines with amines to afford stable peroxyindolenines
Source: Royal Society of Chemistry journal article supplement (doi:10.1039/d4ob01736f), 2024-12-17
Supplement: d4ob01736f1.pdf [file d4ob01736f1.pdf]

# Supporting Information

## Catalyst-Free Coupling of Peroxypyrroloindolenines with Amines to Afford Stable Peroxyindolenines

Xiaoshan Zheng,<sup>‡</sup> Menghan Wang,<sup>‡</sup> Xianbin Sun,<sup>‡</sup> Yu Gao and Haijun Chen\*

Key Laboratory of Molecule Synthesis and Function Discovery (Fujian Province University), College of Chemistry, Fuzhou University, Fuzhou, Fujian 350116, China

### Table of contents

|                                              |    |
|----------------------------------------------|----|
| 1. General Information .....                 | 2  |
| 2. Optimization of Reaction Conditions ..... | 3  |
| Table S1. Optimization of Nucleophiles ..... | 3  |
| 3. Stability study .....                     | 4  |
| 4. MTT assay .....                           | 5  |
| 5. General Procedures .....                  | 6  |
| 6. NMR Spectra .....                         | 46 |
| 7. X-ray Crystal Structure Data .....        | 87 |

## 1. General Information

All reactions were performed under a designated atmosphere in flame-dried round bottom flasks, magnetically stirred, unless otherwise noted. All reactions were performed at room temperature (r.t., approximately 25 °C) unless otherwise noted. Preparative column chromatography was performed using silica gel 60, particle size 0.063–0.200 mm (70–230 mesh, flash). Analytical TLC was carried out employing silica gel 60 F254 plates (Merck, Darmstadt). Visualization of the developed chromatograms was performed with detection by UV (254 nm and 365 nm). <sup>1</sup>H and <sup>13</sup>C nuclear magnetic resonance (NMR) spectrum were recorded on a JEOL-500 (<sup>1</sup>H, 500 MHz; <sup>13</sup>C, 126 MHz; <sup>19</sup>F 471 MHz) spectrometer. Chemical shifts for protons are reported in parts per million and are referenced to the NMR solvent peak (CDCl<sub>3</sub>: δ 7.26; DMSO-*d*<sub>6</sub>: 2.50). Chemical shifts for carbons are reported in parts per million and are referenced to the carbon resonances of the NMR solvent (CDCl<sub>3</sub>: δ 77.16; DMSO-*d*<sub>6</sub>: 39.52). Signals are listed in ppm, and multiplicity identified as s = singlet, d = doublet, t = triplet, q = quartet, m = multiplet. Chemical shifts were expressed in ppm, and J values were given in Hz. High resolution mass Spectrum (HRMS) were obtained from Thermo Fisher Scientific Exactive Plus mass spectrometer by using ESI (Electrospray ionization). X-ray crystal structure data were obtained from Buker D8Venture. The melting point was determined using the X-4A melting point apparatus (Shanghai Yidian Co., Ltd.) and uncorrected. Concentration under reduced pressure was performed by rotary evaporation at 25–35 °C at appropriate pressure. Purified compounds were further dried under high vacuum (0.01-0.10 Torr). Yields refer to purified and spectroscopically pure compounds unless otherwise noted. All commercially available starting materials and solvents were reagent grade and used without further purification.

Abbreviations used: EtOAc = ethyl acetate; THF = tetrahydrofuran; DCE = 1,2-dichloroethane; Et<sub>3</sub>N = triethylamine; Nu = Nucleophile; PE = petroleum ether; TLC = thin layer chromatography.

## 2. Optimization of Reaction Conditions

Table S1. Optimization of Nucleophiles

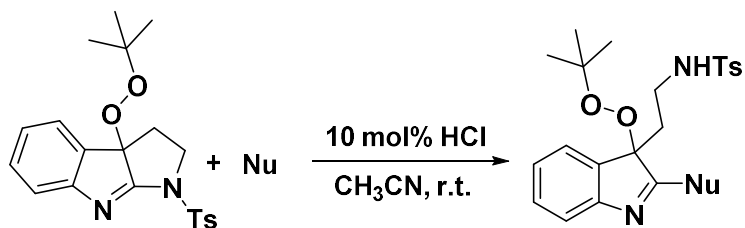

| Entry <sup>a</sup> | Nucleophile     | Yield <sup>b</sup> | Entry <sup>a</sup> | Nucleophile            | Yield <sup>b</sup> |
|--------------------|-----------------|--------------------|--------------------|------------------------|--------------------|
| 1                  | Indole          | trace              | 8                  | Pyrrole                | trace              |
| 2                  | Phenol          | trace              | 9                  | Diethyl malonate       | trace              |
| 3                  | Aniline         | trace              | 10                 | Diethylamine           | trace              |
| 4                  | Styrene         | trace              | 11                 | Salicylaldehyde        | trace              |
| 5                  | Phenylacetylene | trace              | 12                 | Trimethylsilyl cyanide | trace              |
| 6                  | Isoprene        | trace              | 13                 | Benzylamine            | 88%                |
| 7                  | Benzoic acid    | trace              | 14                 | 1-Methylimidazole      | trace              |

<sup>a</sup>Unless otherwise noted, all the reactions were performed using pyrroloindoline (0.1 mmol) and Nucleophile (0.11 mmol) in 1 mL of CH<sub>3</sub>CN at room temperature overnight. <sup>b</sup>Conversion to the desired product by analysis of <sup>1</sup>H NMR spectra of unpurified reaction mixture.

### 3. Stability study

Peroxyproloindolenine, peroxyproloindoline and compound 1 are treated with 0.1 eq of HCl, respectively. Then, the reaction was monitored by TLC analysis.

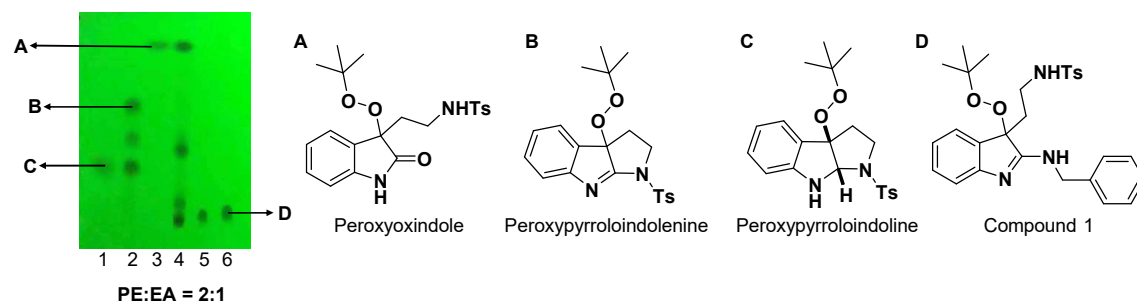

TLC under UV (PE/EtOAc = 2:1, line 1: peroxyoxindole; line 2: Peroxyproloindolenine (4 mg, 0.01 mmol) was added 0.1 eq of HCl; line 3: peroxyproloindoline; line 4: peroxyproloindoline (4 mg, 0.01 mmol) was added 0.1 eq of HCl; line 5: compound 1; line 6: compound 1 (5 mg, 0.01 mmol) was added 0.1 eq of HCl).

#### 4. MTT assay

The cytotoxicities of compounds were determined by MTT assay. B16/F10 cells were seeded in a 96-well plate at a density of 8000 cells per well and cultured for 24 h. Then cells were treated with compounds at different concentrations. After 48 h incubation, the cells were washed three times with PBS followed by the addition of MTT solution (0.5  $\mu\text{g}/\text{mL}$ , 100  $\mu\text{L}$ ). The plates were incubated for an additional 4 h at 37°C. After the medium was removed, 100  $\mu\text{L}$  of DMSO was added to the well and the plates were incubated under constant shaking at 37 °C for >10 min until the formazan crystals were fully dissolved. The absorbance of the solution was measured at 570 nm by using a Tecan Infinite™ 200 PRO multimode microplate reader with five replicates at each dose. All IC<sub>50</sub> values were calculated by GraphPad Prism 9 with nonlinear regression. Experiments were repeated three times with five replications for each dose.

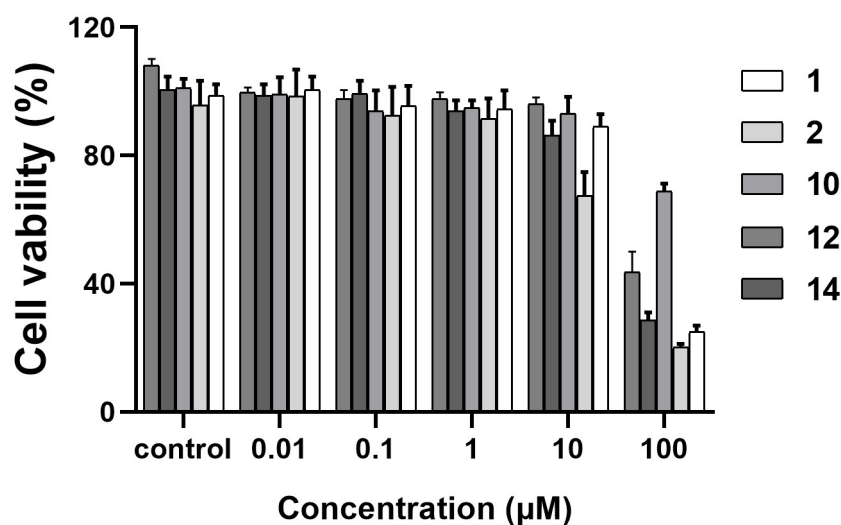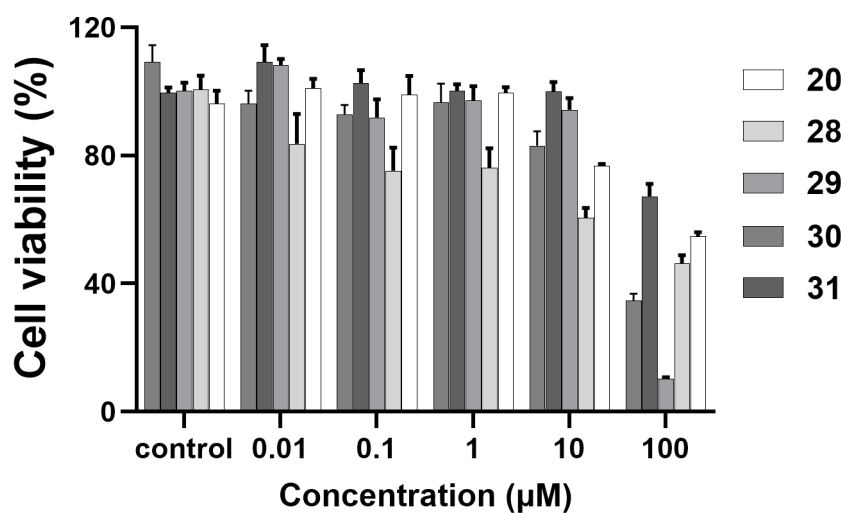

## 5. General Procedures

**Note:** All peroxyindolenines were prepared according to *Org. Lett.* **2018**, *20*, 7937-7941 and *Chem. Commun.* **2019**, *55*, 63-66.

### Compound 1

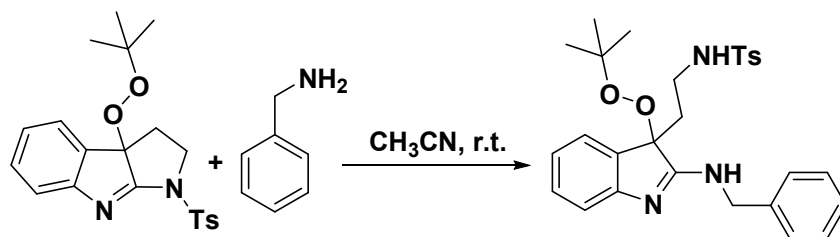

### *N*-(2-(2-(benzylamino)-3-(tert-butylperoxy)-3H-indol-3-yl) ethyl)-4-methylbenzenesulfonamide

To a solution of *3a*-(tert-butylperoxy)-1-tosyl-1,2,3,3a-tetrahydropyrrolo[2,3-*b*] indole (200 mg, 0.5 mmol) in CH<sub>3</sub>CN (5 mL) was added phenylmethanamine (60 μL, 0.55 mmol) to form a homogeneous solution. The mixture was stirred at r.t. for 1 h. TLC (petroleum ether:EtOAc = 4:1) indicated that the reaction was complete. Then concentrated to dryness under vacuum. The residue was purified by silica gel column chromatography (petroleum ether:EtOAc = 2:1) to give the desired product (246 mg, 97%) as a creamy white solid.

**Physical state:** creamy white solid.

**Melting point:** 83 - 84 °C

**TLC:** R<sub>f</sub> = 0.42 (petroleum ether/EtOAc = 1:2).

**<sup>1</sup>H NMR (500 MHz, Acetonitrile-*d*<sub>3</sub>)** δ 7.56 (d, *J* = 8.4 Hz, 2H), 7.37 (d, *J* = 7.0 Hz, 2H), 7.34 (d, *J* = 2.5 Hz, 2H), 7.31 (d, *J* = 7.7 Hz, 2H), 7.26 (t, *J* = 7.2 Hz, 1H), 7.21 – 7.16 (m, 1H), 7.09 (d, *J* = 7.0 Hz, 1H), 6.92 – 6.89 (m, 1H), 6.89 – 6.85 (m, 1H), 6.39 (s, 1H), 5.43 (s, 1H), 4.72 – 4.63 (m, 1H), 4.53 – 4.45 (m, 1H), 2.73 – 2.63 (m, 1H), 2.43 (d, *J* = 5.6 Hz, 1H), 2.40 (s, 3H), 2.20 – 2.12 (m, 1H), 2.01 – 1.95 (m, 1H), 1.11 (s, 9H).

**<sup>13</sup>C NMR (126 MHz, Acetonitrile-*d*<sub>3</sub>)** δ 172.82, 157.18, 144.59, 140.19, 137.78, 133.96, 130.97, 130.66, 129.28, 128.16, 127.88, 127.78, 123.84, 121.92, 117.24, 90.50, 81.03, 46.23, 38.79, 35.29, 26.63, 21.45.

**HRMS (ESI):** calcd for C<sub>28</sub>H<sub>34</sub>N<sub>3</sub>O<sub>4</sub>S [M + H]<sup>+</sup> *m/z*: 508.2265, found 508.2272.

## Compound 2

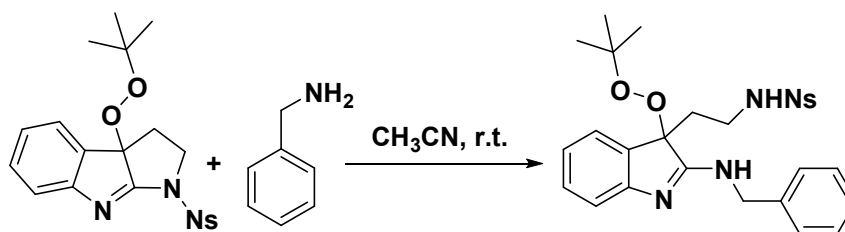

### *N*-(2-(2-(benzylamino)-3-(tert-butylperoxy)-3H-indol-3-yl) ethyl)-4-nitrobenzenesulfonamide

To a solution of 3a-(tert-butylperoxy)-1-((4-nitrophenyl) sulfonyl)-1,2,3,3a-tetrahydropyrrolo[2,3-b]indole (173 mg, 0.4 mmol) in CH<sub>3</sub>CN (4 mL) was added phenylmethanamine (48  $\mu$ L, 0.44 mmol) to form a homogeneous solution. The mixture was stirred at r.t. for 2 h. TLC (petroleum ether:EtOAc = 4:1) indicated that the reaction was complete. Then concentrated to dryness under vacuum. The residue was purified by silica gel column chromatography (petroleum ether: EtOAc = 2:1) to give the desired product (209 mg, 97%) as a yellow oil.

**Physical state:** yellow oil.

**TLC:** R<sub>f</sub> = 0.40 (petroleum ether/EtOAc = 1:1).

**<sup>1</sup>H NMR (500 Hz, CDCl<sub>3</sub>)**  $\delta$  8.21 (d, *J* = 8.8 Hz, 2H), 7.84 (d, *J* = 8.9 Hz, 2H), 7.36 (d, *J* = 7.2 Hz, 2H), 7.35 – 7.31 (m, 2H), 7.31 – 7.27 (m, 1H), 7.23 – 7.20 (m, 1H), 7.07 (d, *J* = 7.3 Hz, 1H), 7.03 (d, *J* = 7.7 Hz, 1H), 6.93 – 6.86 (m, 1H), 4.77 (d, *J* = 14.6 Hz, 1H), 4.53 (d, *J* = 14.6 Hz, 1H), 2.91 – 2.77 (m, 2H), 2.32 – 2.21 (m, 1H), 2.17 – 2.09 (m, 1H), 1.11 (s, 9H).

**<sup>13</sup>C NMR (126 MHz, CDCl<sub>3</sub>)**  $\delta$  149.98, 145.66, 137.68, 131.88, 130.72, 128.89, 128.70, 128.28, 127.90, 127.23, 127.03, 124.38, 123.09, 121.88, 117.00, 89.94, 81.06, 47.01, 38.39, 35.26, 26.45.

**HRMS (ESI):** calcd for C<sub>27</sub>H<sub>31</sub>N<sub>4</sub>O<sub>6</sub>S [M + H]<sup>+</sup> *m/z*: 539.1959, found 539.1956.

### Compound 3

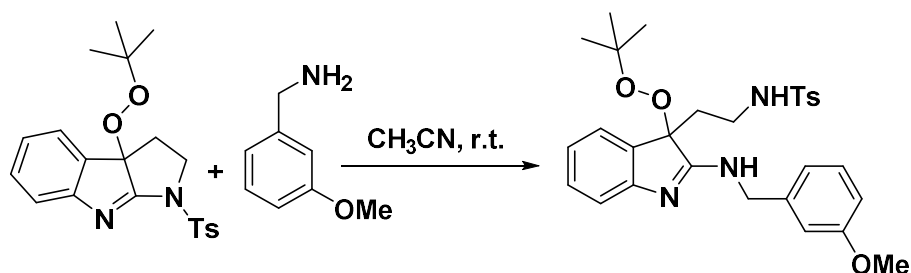

#### *N*-(2-(3-(tert-butylperoxy)-2-((3-methoxybenzyl) amino)-3H-indol-3-yl) ethyl)-4-methylbenzenesulfonamide

To a solution of 3a-(tert-butylperoxy)-1-tosyl-1,2,3,3a-tetrahydropyrrolo[2,3-b] indole (120 mg, 0.3 mmol) in CH<sub>3</sub>CN (3 mL) was added (3-methoxyphenyl)methanamine (42  $\mu$ L, 0.44 mmol) to form a homogeneous solution. The mixture was stirred at r.t. for 3 h. TLC (petroleum ether:EtOAc = 4:1) indicated that the reaction was complete. Then concentrated to dryness under vacuum. The residue was purified by silica gel column chromatography (petroleum ether: EtOAc = 2:1) to give the desired product (153 mg, 95%) as a creamy white solid.

**Physical state:** creamy white solid.

**Melting point:** 116 - 118 °C.

**TLC:** R<sub>f</sub> = 0.32 (petroleum ether/EtOAc = 1:2).

**<sup>1</sup>H NMR (500 MHz, CDCl<sub>3</sub>)**  $\delta$  7.60 (d, *J* = 8.3 Hz, 2H), 7.24 (d, *J* = 9.0 Hz, 2H), 7.21 (s, 1H), 7.19 (d, *J* = 1.3 Hz, 1H), 7.08 (d, *J* = 7.7 Hz, 1H), 6.98 – 6.96 (m, 1H), 6.95 (s, 1H), 6.93 (t, *J* = 2.0 Hz, 1H), 6.87 – 6.84 (m, 1H), 6.84 – 6.80 (m, 1H), 5.54 (s, 1H), 5.06 (s, 1H), 4.74 (d, *J* = 14.6 Hz, 1H), 4.50 (d, *J* = 14.6 Hz, 1H), 3.77 (s, 3H), 2.90 – 2.83 (m, 1H), 2.83 – 2.76 (m, 1H), 2.38 (s, 3H), 2.26 – 2.20 (m, 1H), 2.06 – 2.00 (m, 1H), 1.11 (s, 9H).

**<sup>13</sup>C NMR (126 MHz, CDCl<sub>3</sub>; CD<sub>3</sub>OD = 10:1)**  $\delta$  172.19, 159.88, 154.74, 143.50, 139.26, 136.52, 131.81, 130.39, 129.71, 126.96, 123.05, 121.62, 120.02, 116.51, 113.59, 90.44, 80.76, 55.24, 46.89, 37.85, 35.03, 26.28, 21.41.

**HRMS (ESI):** calcd for C<sub>29</sub>H<sub>36</sub>N<sub>3</sub>O<sub>5</sub>S [M + H]<sup>+</sup> *m/z*: 538.2370, found 538.2358.



#### Compound 4

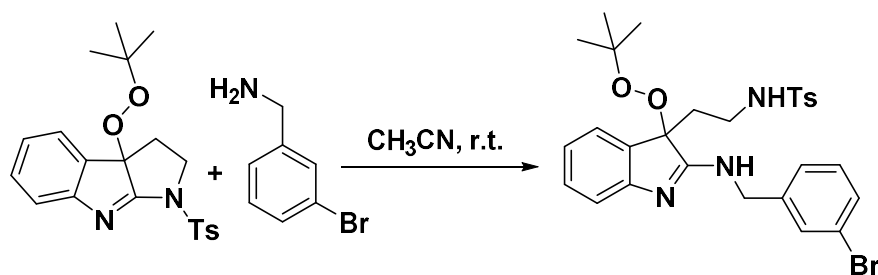

#### *N*-(2-(2-((3-bromobenzyl) amino)-3-(tert-butylperoxy)-3H-indol-3-yl) ethyl)-4-methylbenzenesulfonamide

To a solution of 3a-(tert-butylperoxy)-1-tosyl-1,2,3,3a-tetrahydropyrrolo[2,3-b] indole (160 mg, 0.4 mmol) (3-bromophenyl) methanamine (55 mg, 0.44 mmol) in CH<sub>3</sub>CN (4 mL) to form a homogeneous solution. The mixture was stirred at r.t. overnight. TLC (petroleum ether:EtOAc = 4:1) indicated that the reaction was complete. Then concentrated to dryness under vacuum. The residue was purified by silica gel column chromatography (petroleum ether:EtOAc = 2:1) to give the desired product (220 mg, 94%) as a creamy white solid.

**Physical state:** creamy white solid.

**Melting point:** 150 - 152 °C.

**TLC:** R<sub>f</sub> = 0.30 (petroleum ether/EtOAc = 1:1).

**<sup>1</sup>H NMR (500 MHz, CDCl<sub>3</sub>)** δ 7.61 (d, *J* = 7.9 Hz, 2H), 7.50 (d, *J* = 2.3 Hz, 1H), 7.40 (d, *J* = 7.9 Hz, 1H), 7.31 (d, *J* = 7.7 Hz, 1H), 7.24 (d, *J* = 8.0 Hz, 2H), 7.22 (s, 1H), 7.21 – 7.17 (m, 1H), 7.09 (d, *J* = 6.7 Hz, 1H), 6.99 (d, *J* = 7.2 Hz, 1H), 6.87 (t, *J* = 7.4 Hz, 1H), 5.56 (s, 1H), 4.93 (s, 1H), 4.84 (d, *J* = 15.0 Hz, 1H), 4.47 (d, *J* = 15.0 Hz, 1H), 2.90 – 2.76 (m, 2H), 2.39 (s, 3H), 2.27 – 2.20 (m, 1H), 2.09 – 2.03 (m, 1H), 1.13 (s, 9H).

**<sup>13</sup>C NMR (126 MHz, CDCl<sub>3</sub>)** δ 172.41, 155.40, 143.60, 140.36, 136.61, 132.22, 130.80, 130.61, 130.57, 130.36, 129.81, 127.14, 126.42, 123.09, 122.84, 121.77, 117.36, 90.28, 81.06, 45.91, 38.28, 35.09, 26.51, 21.60.

**HRMS (ESI):** calcd for C<sub>28</sub>H<sub>33</sub>BrN<sub>3</sub>O<sub>4</sub>S [M + H]<sup>+</sup> *m/z* 586.1370, found 586.1365.

## Compound 5

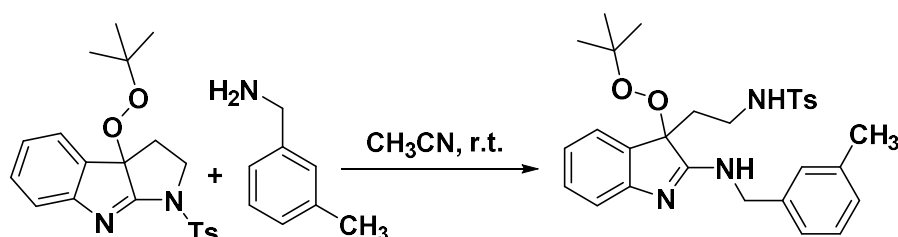

### ***N*-(2-(3-(tert-butylperoxy)-2-((3-methylbenzyl) amino)-3H-indol-3-yl) ethyl)-4-methylbenzenesulfonamide**

To a solution of 3a-(tert-butylperoxy)-1-tosyl-1,2,3,3a-tetrahydropyrrolo[2,3-b] indole (160 mg, 0.4 mmol) in CH<sub>3</sub>CN (4 mL) was added *m*-tolylmethanamine (55  $\mu$ L, 0.44 mmol) to form a homogeneous solution. The mixture was stirred at r.t. for 3 h. TLC (petroleum ether:EtOAc = 4:1) indicated that the reaction was complete. Then concentrated to dryness under vacuum. The residue was purified by silica gel column chromatography (petroleum ether:EtOAc = 2:1) to give the desired product (203 mg, 97%) as yellow oil.

**Physical state:** yellow oil.

**TLC:** R<sub>f</sub> = 0.35 (petroleum ether/EtOAc = 1:2).

**<sup>1</sup>H NMR (500 MHz, CDCl<sub>3</sub>)**  $\delta$  7.61 (d, *J* = 8.3 Hz, 2H), 7.25 (d, *J* = 4.8 Hz, 2H), 7.23 (s, 1H), 7.22 – 7.21 (m, 1H), 7.18 (s, 1H), 7.17 (d, *J* = 7.2 Hz, 1H), 7.12 (s, 1H), 7.11 (s, 1H), 6.97 – 6.94 (m, 1H), 6.88 – 6.83 (m, 1H), 5.46 (s, 1H), 4.87 (s, 1H), 4.74 (d, *J* = 14.4 Hz, 1H), 4.51 (s, 1H), 2.92 – 2.86 (m, 1H), 2.86 – 2.79 (m, 1H), 2.40 (s, 3H), 2.35 (s, 3H), 2.28 – 2.21 (m, 1H), 2.07 – 1.99 (m, 1H), 1.12 (s, 9H).

**<sup>13</sup>C NMR (126 MHz, CDCl<sub>3</sub>)**  $\delta$  172.42, 155.61, 143.53, 138.59, 137.67, 136.68, 132.06, 130.60, 129.79, 128.79, 128.72, 128.60, 127.17, 125.03, 123.10, 121.62, 117.29, 90.27, 81.00, 55.34, 37.42, 33.06, 26.45, 21.59, 21.49.

**HRMS (ESI):** calcd for C<sub>29</sub>H<sub>36</sub>N<sub>3</sub>O<sub>4</sub>S [M + H]<sup>+</sup> *m/z* 522.2421, found 522.2408.

## Compound 6

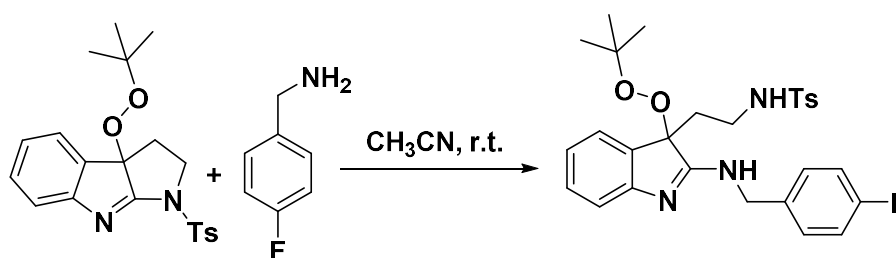

### *N*-(2-(3-(tert-butylperoxy)-2-((4-fluorobenzyl) amino)-3H-indol-3-yl) ethyl)-4-methylbenzenesulfonamide

To a solution of 3a-(tert-butylperoxy)-1-tosyl-1,2,3,3a-tetrahydropyrrolo[2,3-b] indole (160 mg, 0.4 mmol) in CH<sub>3</sub>CN (4 mL) was added (4-fluorophenyl) methanamine (50  $\mu$ L, 0.44 mmol) to form a homogeneous solution. The mixture was stirred at r.t. for 4 h. TLC (petroleum ether:EtOAc = 4:1) indicated that the reaction was complete. Then concentrated to dryness under vacuum. The residue was purified by silica gel column chromatography (petroleum ether:EtOAc = 2:1) to give the desired product (197 mg, 94%) as a cream white solid.

**Physical state:** cream white solid.

**Melting point:** 55 - 56 °C.

**TLC:** R<sub>f</sub> = 0.38 (petroleum ether/EtOAc = 1:2).

**<sup>1</sup>H NMR (500 MHz, CDCl<sub>3</sub>)**  $\delta$  7.61 (d, *J* = 8.3 Hz, 2H), 7.38 – 7.33 (m, 2H), 7.25 (d, *J* = 8.0 Hz, 2H), 7.23 – 7.21 (m, 1H), 7.11 (d, *J* = 7.7 Hz, 1H), 7.01 (t, *J* = 8.7 Hz, 2H), 6.97 (d, *J* = 8.6 Hz, 1H), 6.89 – 6.85 (m, 1H), 5.49 (s, 1H), 4.80 (s, 1H), 4.76 (s, 1H), 4.50 (d, *J* = 14.6 Hz, 1H), 2.93 – 2.84 (m, 1H), 2.84 – 2.74 (m, 1H), 2.40 (s, 3H), 2.27 – 2.19 (m, 1H), 2.11 – 2.03 (m, 1H), 1.11 (s, 9H).

**<sup>13</sup>C NMR (126 MHz, DMSO-*d*<sub>6</sub>)**  $\delta$  171.61, 161.65 (d, *J* = 240.0 Hz), 156.67, 143.24, 137.53, 136.15 (d, *J* = 3.1 Hz), 133.46, 130.15, 129.47 (d, *J* = 8.0 Hz), 126.97, 123.32, 120.89, 116.38, 115.27 (d, *J* = 21.2 Hz), 89.59, 80.19, 44.75, 37.90, 34.44, 26.81, 21.46.

**<sup>19</sup>F NMR (471 MHz, DMSO-*d*<sub>6</sub>)**  $\delta$  -116.29.

**HRMS (ESI):** calcd for C<sub>28</sub>H<sub>33</sub>FN<sub>3</sub>O<sub>4</sub>S [M + H]<sup>+</sup> *m/z* 526.2170, found 526.2175.

## Compound 7

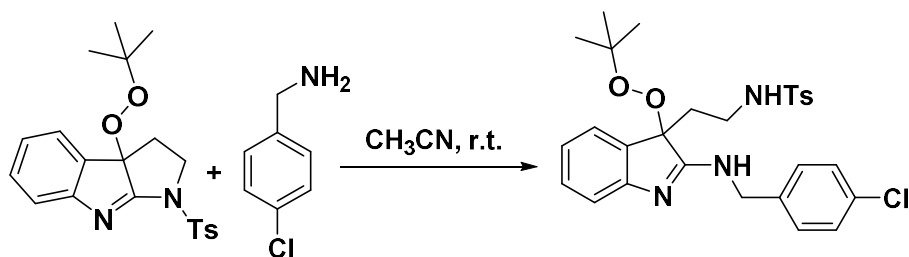

### *N*-(2-(3-(tert-butylperoxy)-2-((4-chlorobenzyl) amino)-3H-indol-3-yl) ethyl)-4-methylbenzenesulfonamide

To a solution of 3a-(tert-butylperoxy)-1-tosyl-1,2,3,3a-tetrahydropyrrolo[2,3-b] indole (160 mg, 0.4 mmol) in CH<sub>3</sub>CN (4 mL) was added (4-chlorophenyl)methanamine (54  $\mu$ L, 0.44 mmol) to form a homogeneous solution. The mixture was stirred at r.t. for 5 h. TLC (petroleum ether:EtOAc = 4:1) indicated that the reaction was complete. Then concentrated to dryness under vacuum. The residue was purified by silica gel column chromatography (petroleum ether:EtOAc = 2:1) to give the desired product (206 mg, 95%) as a yellow oil.

**Physical state:** yellow oil.

**TLC:** R<sub>f</sub> = 0.33 (petroleum ether/EtOAc = 1:2).

**<sup>1</sup>H NMR (500 MHz, CDCl<sub>3</sub>)**  $\delta$  7.60 (d,  $J$  = 1.7 Hz, 2H), 7.32 (d,  $J$  = 8.5 Hz, 2H), 7.31 – 7.28 (m, 2H), 7.26 – 7.24 (m, 2H), 7.24 – 7.21 (m, 1H), 7.10 (d,  $J$  = 7.8 Hz, 1H), 6.98 (d,  $J$  = 7.3 Hz, 1H), 6.90 – 6.85 (m, 1H), 5.53 (s, 1H), 4.79 (d,  $J$  = 26.1 Hz, 2H), 4.51 (d,  $J$  = 14.9 Hz, 1H), 2.91 – 2.76 (m, 2H), 2.41 (d,  $J$  = 1.7 Hz, 3H), 2.27 – 2.20 (m, 1H), 2.12 – 2.04 (m, 1H), 1.12 (s, 9H).

**<sup>13</sup>C NMR (126 MHz, DMSO-*d*<sub>6</sub>)**  $\delta$  171.59, 156.60, 143.23, 139.11, 137.54, 133.47, 131.67, 130.17, 129.37, 128.52, 126.96, 123.33, 120.92, 116.39, 89.58, 80.20, 79.67, 44.78, 37.89, 34.46, 26.82, 21.48.

**HRMS (ESI):** calcd for C<sub>28</sub>H<sub>33</sub>ClN<sub>3</sub>O<sub>4</sub>S [M + H]<sup>+</sup>  $m/z$  542.1875, found 542.1860.

## Compound 8

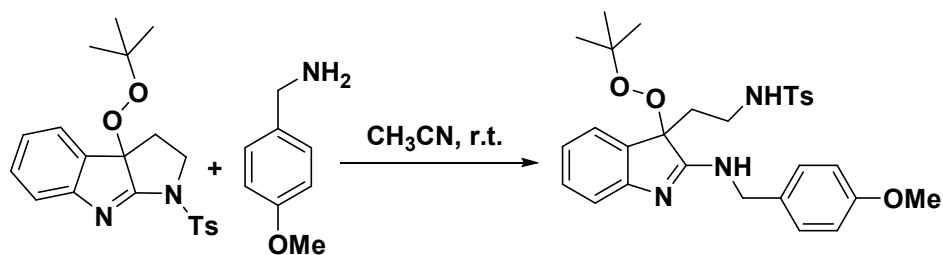

### *N*-(2-(3-(tert-butylperoxy)-2-((4-methoxybenzyl) amino)-3H-indol-3-yl) ethyl)-4-methylbenzenesulfonamide

To a solution of 3a-(tert-butylperoxy)-1-tosyl-1,2,3,3a-tetrahydropyrrolo[2,3-b] indole (120 mg, 0.3 mmol) in CH<sub>3</sub>CN (3 mL) was added (4-methoxyphenyl)methanamine (43  $\mu$ L, 0.33 mmol) to form a homogeneous solution. The mixture was stirred at r.t. for 3 h. TLC (petroleum ether:EtOAc = 4:1) indicated that the reaction was complete. Then concentrated to dryness under vacuum. The residue was purified by silica gel column chromatography (petroleum ether:EtOAc = 2:1) to give the desired product (150 mg, 93%) as a creamy white solid.

**Physical state:** creamy white solid.

**Melting point:** 101 - 103  $^{\circ}$ C.

**TLC:** R<sub>f</sub> = 0.33 (petroleum ether/EtOAc = 1:2).

**<sup>1</sup>H NMR (500 MHz, CDCl<sub>3</sub>)**  $\delta$  7.60 (d, *J* = 6.9 Hz, 2H), 7.29 (d, *J* = 8.1 Hz, 2H), 7.25 – 7.22 (m, 2H), 7.10 (s, 1H), 6.98 – 6.92 (m, 1H), 6.86 (s, 2H), 6.85 (s, 1H), 5.45 (s, 1H), 4.99 (s, 1H), 4.70 (d, *J* = 13.4 Hz, 1H), 4.47 (d, *J* = 12.9 Hz, 1H), 3.79 (s, 3H), 2.82 (d, *J* = 33.1 Hz, 2H), 2.39 (s, 3H), 2.22 (s, 1H), 2.03 (d, *J* = 28.9 Hz, 1H), 1.10 (s, 9H).

**<sup>13</sup>C NMR (126 MHz, CDCl<sub>3</sub>)**  $\delta$  160.02, 143.51, 139.38, 136.67, 132.11, 130.54, 129.89, 129.78, 127.16, 123.09, 121.64, 120.14, 117.19, 113.73, 113.10, 90.19, 80.97, 55.35, 46.78, 38.26, 35.04, 26.44, 21.58.

**HRMS (ESI):** calcd for C<sub>29</sub>H<sub>36</sub>N<sub>3</sub>O<sub>5</sub>S [M + H]<sup>+</sup> *m/z*: 538.2370, found 538.2370.

## Compound 9

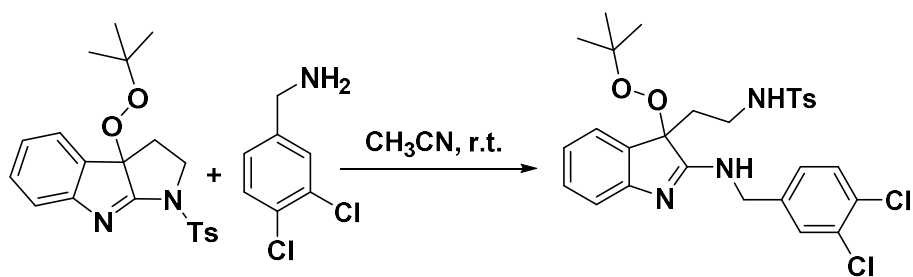

### *N*-(2-(3-(tert-butylperoxy)-2-((3,4-dichlorobenzyl) amino)-3H-indol-3-yl) ethyl)-4-methylbenzenesulfonamide

To a solution of 3a-(tert-butylperoxy)-1-tosyl-1,2,3,3a-tetrahydropyrrolo[2,3-b] indole (120 mg, 0.3 mmol) in CH<sub>3</sub>CN (3 mL) was added (3,4-dichlorophenyl) methanamine (44  $\mu$ L, 0.33 mmol) to form a homogeneous solution. The mixture was stirred at r.t. overnight. TLC (petroleum ether:EtOAc = 4:1) indicated that the reaction was complete. Then concentrated to dryness under vacuum. The residue was purified by silica gel column chromatography (petroleum ether:EtOAc = 2:1) to give the desired product (163 mg, 94%) as a creamy white solid.

**Physical state:** creamy white solid.

**Melting point:** 98 - 100 °C.

**TLC:** R<sub>f</sub> = 0.33 (petroleum ether/EtOAc = 1:1).

**<sup>1</sup>H NMR (500 MHz, CDCl<sub>3</sub>)**  $\delta$  7.60 (d, *J* = 8.3 Hz, 2H), 7.45 (d, *J* = 1.9 Hz, 1H), 7.38 – 7.34 (m, 1H), 7.25 – 7.23 (m, 2H), 7.23 (s, 1H), 7.21 (t, *J* = 3.5 Hz, 1H), 7.07 (d, *J* = 7.9 Hz, 1H), 7.00 (d, *J* = 7.2 Hz, 1H), 6.88 (t, *J* = 7.4 Hz, 1H), 5.56 (s, 1H), 4.95 (s, 1H), 4.84 (d, *J* = 15.0 Hz, 1H), 4.46 (d, *J* = 15.3 Hz, 1H), 2.89 – 2.73 (m, 2H), 2.40 (s, 3H), 2.26 – 2.20 (m, 1H), 2.13 – 2.06 (m, 1H), 1.13 (s, 9H).

**<sup>13</sup>C NMR (126 MHz, DMSO-*d*<sub>6</sub>)**  $\delta$  171.56, 156.43, 143.23, 141.38, 137.52, 133.44, 131.36, 130.75, 130.20, 130.13, 129.65, 129.34, 127.86, 126.98, 123.81, 121.04, 116.48, 89.55, 80.27, 44.37, 37.88, 34.47, 26.82, 21.48.

**HRMS (ESI):** calcd for C<sub>28</sub>H<sub>32</sub>Cl<sub>2</sub>N<sub>3</sub>O<sub>4</sub>S [M + H]<sup>+</sup> *m/z* :576.1485, found 576.1475.

### Compound 10

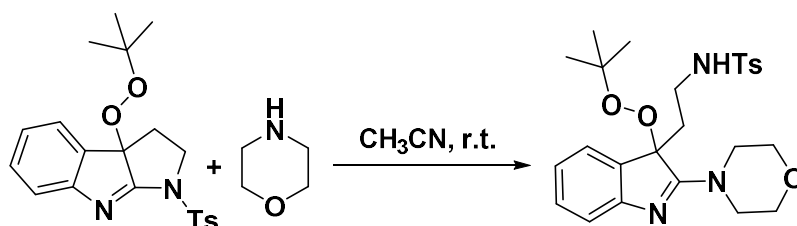

#### ***N*-(2-(3-(*tert*-butylperoxy)-2-morpholino-3*H*-indol-3-yl) ethyl)-4-methylbenzenesulfonamide**

To a solution of *3a*-(*tert*-butylperoxy)-1-tosyl-1,2,3,3*a*-tetrahydropyrrolo[2,3-*b*] indole (200 mg, 0.5 mmol) in CH<sub>3</sub>CN (5 mL) was added morpholine (48 μL, 0.55 mol) to form a homogeneous solution. The mixture was stirred at r.t. overnight. TLC (petroleum ether:EtOAc = 4:1) indicated that the reaction was complete. Then concentrated to dryness under vacuum. The residue was purified by silica gel column chromatography (petroleum ether:EtOAc = 1:1) to give the desired product (236 mg, 97%) as a creamy white solid.

**Physical state:** creamy white solid.

**Melting point:** 65 - 67 °C.

**TLC:** R<sub>f</sub> = 0.21 (petroleum ether/EtOAc = 1:2).

**<sup>1</sup>H NMR (500 Hz, CDCl<sub>3</sub>)** δ 7.59 (d, *J* = 8.3 Hz, 2H), 7.24 (s, 2H), 7.21 – 7.17 (m, 1H), 7.03 (d, *J* = 7.7 Hz, 1H), 7.01 – 6.98 (m, 1H), 6.89 – 6.83 (m, 1H), 4.53 (s, 1H), 3.97 – 3.82 (m, 4H), 3.81 (s, 4H), 2.73 – 2.63 (m, 2H), 2.41 (s, 3H), 2.25 – 2.17 (m, 2H), 1.09 (s, 9H).

**<sup>13</sup>C NMR (126 MHz, CDCl<sub>3</sub>)** δ 170.74, 153.96, 143.56, 136.60, 133.30, 130.09, 129.77, 127.09, 122.32, 121.40, 116.50, 91.29, 80.68, 66.87, 46.12, 38.38, 35.36, 26.50, 21.57.

**HRMS (ESI):** calcd for C<sub>25</sub>H<sub>34</sub>N<sub>3</sub>O<sub>5</sub>S [M + H]<sup>+</sup> *m/z*: 488.2214, found 488.2220.

### Compound 11

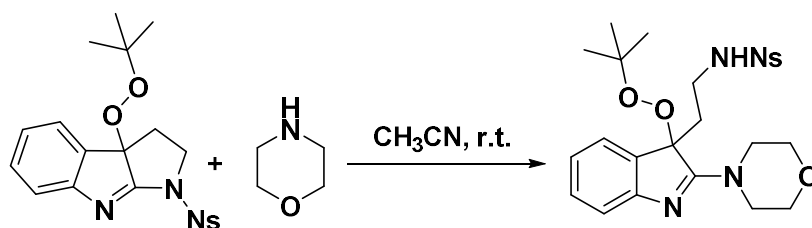

#### ***N*-(2-(3-(tert-butylperoxy)-2-morpholino-3H-indol-3-yl) ethyl)-4-nitrobenzenesulfonamide**

To a solution of 3a-(tert-butylperoxy)-1-((4-nitrophenyl) sulfonyl)-1,2,3,3a-tetrahydropyrrolo[2,3-b]indole (216 mg, 0.5 mmol) in CH<sub>3</sub>CN (5 mL) was added morpholine (48  $\mu$ L, 0.55 mol) to form a homogeneous solution. The mixture was stirred at r.t. for 2 h. TLC (petroleum ether:EtOAc = 4:1) indicated that the reaction was complete. Then concentrated to dryness under vacuum. The residue was purified by silica gel column chromatography (petroleum ether:EtOAc = 1:2) to give the desired product (252 mg, 97%) as a yellow solid.

**Physical state:** yellow solid.

**Melting point:** 159 - 160 °C.

**TLC:** R<sub>f</sub> = 0.22 (petroleum ether/EtOAc = 1:2).

**<sup>1</sup>H NMR (500 Hz, CDCl<sub>3</sub>)**  $\delta$  8.28 (d, *J* = 8.9 Hz, 2H), 7.85 (d, *J* = 8.8 Hz, 2H), 7.23 – 7.18 (m, 1H), 7.04 (d, *J* = 7.3 Hz, 1H), 7.01 (d, *J* = 7.7 Hz, 1H), 6.92 – 6.86 (m, 1H), 4.81 (s, 1H), 3.92 (s, 4H), 3.83 (s, 4H), 2.77 – 2.63 (m, 2H), 2.36 – 2.19 (m, 2H), 1.10 (s, 9H).

**<sup>13</sup>C NMR (126 MHz, CDCl<sub>3</sub>)**  $\delta$  170.76, 145.40, 133.16, 130.29, 128.27, 124.40, 122.31, 121.64, 116.49, 91.14, 80.86, 77.42, 77.17, 76.92, 66.85, 46.19, 38.62, 35.36, 26.49.

**HRMS (ESI):** calcd for C<sub>24</sub>H<sub>31</sub>N<sub>4</sub>O<sub>7</sub>S [M + H]<sup>+</sup> *m/z*: 519.1908, found 519.1900.



## Compound 12

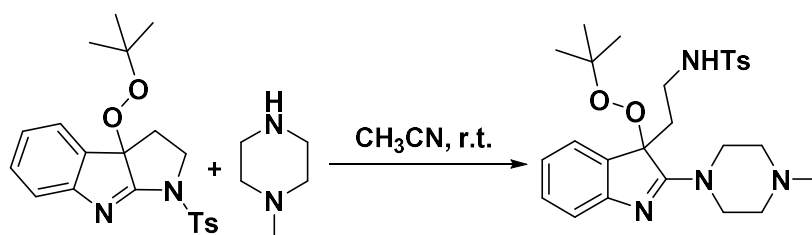

### ***N*-(2-(3-(tert-butylperoxy)-2-(4-methylpiperazin-1-yl)-3H-indol-3-yl) ethyl)-4-methylbenzenesulfonamide**

To a solution of 3a-(tert-butylperoxy)-1-tosyl-1,2,3,3a-tetrahydropyrrolo[2,3-b] indole (200 mg, 0.5 mmol) in CH<sub>3</sub>CN (5 mL) was added 1-methylpiperazine (61  $\mu$ L, 0.55 mmol) to form a homogeneous solution. The mixture was stirred at r.t. for 6 h. TLC (petroleum ether:EtOAc = 4:1) indicated that the reaction was complete. Then concentrated to dryness under vacuum. The residue was purified by silica gel column chromatography (petroleum ether:EtOAc = 1:2) to give the desired product (225 mg, 90%) as a creamy white solid.

**Physical state:** creamy white solid.

**Melting point:** 106 - 108 °C.

**TLC:** R<sub>f</sub> = 0.21 (petroleum ether/EtOAc = 1:2).

**<sup>1</sup>H NMR (500 Hz, CDCl<sub>3</sub>)**  $\delta$  7.55 (d, *J* = 8.0 Hz, 2H), 7.20 (d, *J* = 7.6 Hz, 2H), 7.13 (t, *J* = 7.7 Hz, 1H), 6.97 (s, 1H), 6.94 (s, 1H), 6.86 – 6.77 (m, 1H), 5.07 (s, 1H), 3.97 – 3.60 (m, 4H), 2.71 – 2.56 (m, 2H), 2.51 – 2.43 (m, 4H), 2.36 (s, 3H), 2.29 (s, 3H), 2.25 – 2.10 (m, 2H), 1.06 (s, 9H).

**<sup>13</sup>C NMR (126 MHz, CDCl<sub>3</sub>)**  $\delta$  170.73, 154.12, 143.45, 136.59, 133.42, 130.12, 129.89, 127.16, 122.38, 121.16, 116.32, 91.20, 54.93, 45.54, 37.77, 35.42, 26.49.

**HRMS (ESI):** calcd for C<sub>26</sub>H<sub>37</sub>N<sub>4</sub>O<sub>4</sub>S [M + H]<sup>+</sup> *m/z*: 501.2530, found 501.2535.

### Compound 13

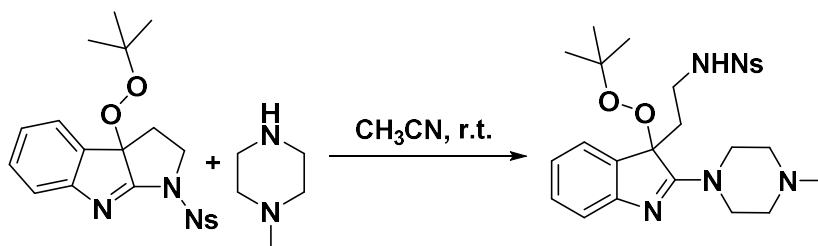

#### ***N*-(2-(3-(*tert*-butylperoxy)-2-(4-methylpiperazin-1-yl)-3*H*-indol-3-yl) ethyl)-4-nitrobenzenesulfonamide**

To a solution of 3*a*-(*tert*-butylperoxy)-1-((4-nitrophenyl) sulfonyl)-1,2,3,3*a*-tetrahydropyrrolo[2,3-*b*]indole (130 mg, 0.3 mmol) in CH<sub>3</sub>CN (3 mL) was added 1-methylpiperazine (37  $\mu$ L, 0.33 mmol) to form a homogeneous solution. The mixture was stirred at r.t. overnight. TLC (petroleum ether:EtOAc = 4:1) indicated that the reaction was complete. Then concentrated to dryness under vacuum. The residue was purified by silica gel column chromatography (petroleum ether:EtOAc = 2:1) to give the desired product (143 mg, 90%) as a yellow oil.

**Physical state:** yellow oil.

**TLC:** R<sub>f</sub> = 0.23 (petroleum ether/EtOAc = 1:2).

**<sup>1</sup>H NMR (500 MHz, CDCl<sub>3</sub>)**  $\delta$  8.14 (d, *J* = 9.3 Hz, 2H), 7.73 (t, *J* = 8.2 Hz, 2H), 7.10 – 7.03 (m, 1H), 6.99 (t, *J* = 5.3 Hz, 1H), 6.83 – 6.76 (m, 2H), 5.27 (s, 1H), 3.79 (s, 4H), 2.53 – 2.44 (m, 2H), 2.42 (s, 3H), 2.21 (d, *J* = 4.3 Hz, 4H), 2.19 – 2.12 (m, 2H), 1.01 (s, 9H).

**<sup>13</sup>C NMR (126 MHz CDCl<sub>3</sub>)**  $\delta$  209.82, 170.50, 153.92, 149.87, 145.62, 133.29, 130.06, 128.20, 124.29, 122.22, 121.36, 116.20, 90.92, 80.62, 55.98, 54.84, 46.56, 46.13, 45.52, 38.27, 35.50, 26.43.

**HRMS (ESI):** calcd for C<sub>25</sub>H<sub>34</sub>N<sub>5</sub>O<sub>6</sub>S [M + H]<sup>+</sup> *m/z*: 532.2224, found 532.2230.

**Compound 14**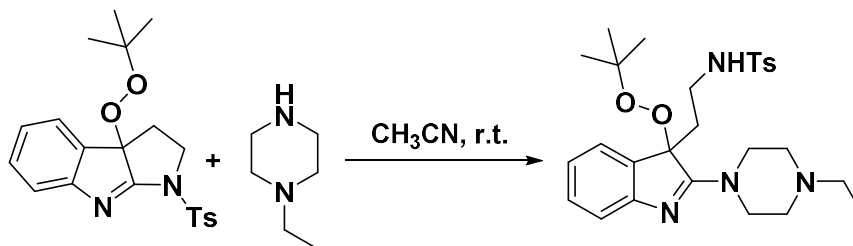***N*-(2-(3-(tert-butylperoxy)-2-(4-ethylpiperazin-1-yl)-3H-indol-3-yl) ethyl)-4-methylbenzenesulfonamide**

To a solution of 3a-(tert-butylperoxy)-1-tosyl-1,2,3,3a-tetrahydropyrrolo[2,3-b] indole (120 mg, 0.3 mmol) in CH<sub>3</sub>CN (3 mL) was added 1-ethylpiperazine (42  $\mu$ L, 0.33 mmol) to form a homogeneous solution. The mixture was stirred at r.t. overnight. TLC (petroleum ether:EtOAc = 4:1) indicated that the reaction was complete. Then concentrated to dryness under vacuum. The residue was purified by silica gel column chromatography (CH<sub>2</sub>CH<sub>2</sub>:MeOH = 20:1) to give the desired product (139 mg, 90%) as a creamy white solid.

**Physical state:** creamy white solid.

**Melting point:** 118 - 119 °C.

**TLC:** R<sub>f</sub> = 0.22 (CH<sub>2</sub>CH<sub>2</sub>/MeOH = 20:1).

**<sup>1</sup>H NMR (500 Hz, CDCl<sub>3</sub>)**  $\delta$  7.59 (d, *J* = 8.2 Hz, 2H), 7.24 (d, *J* = 8.0 Hz, 2H), 7.18 (t, *J* = 7.6 Hz, 1H), 7.01 (d, *J* = 7.7 Hz, 1H), 6.97 (d, *J* = 7.3 Hz, 1H), 6.84 (t, *J* = 7.4 Hz, 1H), 4.51 (s, 1H), 3.85 (d, *J* = 16.4 Hz, 4H), 2.73 – 2.65 (m, 2H), 2.55 (d, *J* = 24.3 Hz, 4H), 2.48 (d, *J* = 7.1 Hz, 2H), 2.40 (s, 3H), 2.25 – 2.17 (m, 2H), 1.09 (s, 9H).

**<sup>13</sup>C NMR (126 MHz, CDCl<sub>3</sub>)**  $\delta$  170.69, 153.93, 143.48, 136.58, 133.31, 130.02, 129.76, 127.10, 122.28, 121.24, 116.38, 91.27, 80.56, 52.64, 52.41, 45.60, 38.40, 35.48, 26.49, 21.58, 11.96.

**HRMS (ESI):** calcd for C<sub>27</sub>H<sub>39</sub>N<sub>4</sub>O<sub>4</sub>S [M + H]<sup>+</sup> *m/z*: 515.2687, found 515.2689.

### Compound 15

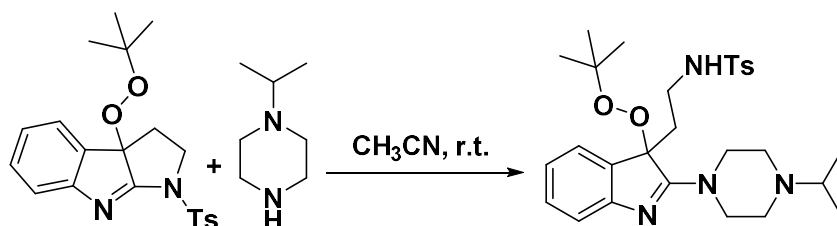

#### ***N*-(2-(3-(tert-butylperoxy)-2-(4-isopropylpiperazin-1-yl)-3H-indol-3-yl) ethyl)-4-methylbenzenesulfonamide**

To a solution of 3a-(tert-butylperoxy)-1-tosyl-1,2,3,3a-tetrahydropyrrolo[2,3-b] indole (160 mg, 0.4 mmol) in CH<sub>3</sub>CN (4 mL) was added 1-isopropylpiperazine (63  $\mu$ L, 0.44 mmol) to form a homogeneous solution. The mixture was stirred at r.t. overnight. TLC (petroleum ether:EtOAc = 4:1) indicated that the reaction was complete. Then concentrated to dryness under vacuum. The residue was purified by silica gel column chromatography (petroleum ether:EtOAc = 2:1) to give the desired product (190 mg, 90%) as a creamy white solid.

**Physical state:** creamy white solid.

**Melting point:** 125 - 127 °C.

**TLC:** R<sub>f</sub> = 0.26 (CH<sub>2</sub>CH<sub>2</sub>/MeOH = 20:1).

**<sup>1</sup>H NMR (500 Hz, CDCl<sub>3</sub>)**  $\delta$  7.56 (d, *J* = 8.5 Hz, 2H), 7.21 (d, *J* = 7.8 Hz, 2H), 7.15 (t, *J* = 7.6 Hz, 1H), 6.97 (d, *J* = 3.9 Hz, 1H), 6.95 (s, 1H), 6.81 (t, *J* = 7.4 Hz, 1H), 4.96 (s, 1H), 3.95 – 3.70 (m, 4H), 2.78 – 2.66 (m, 2H), 2.64 (s, 1H), 2.62 (t, *J* = 4.9 Hz, 4H), 2.38 (s, 3H), 2.25 – 2.14 (m, 2H), 1.07 (s, 9H), 1.05 (s, 6H).

**<sup>13</sup>C NMR (126 MHz, CDCl<sub>3</sub>)**  $\delta$  170.66, 154.06, 143.46, 136.59, 133.34, 130.00, 129.74, 127.11, 122.28, 121.14, 116.37, 91.25, 81.51, 54.75, 48.62, 45.98, 38.43, 35.45, 26.50, 21.58, 18.50.

**HRMS (ESI):** calcd for C<sub>27</sub>H<sub>41</sub>N<sub>4</sub>O<sub>4</sub>S [M + H]<sup>+</sup> *m/z*: 529.2843, found 529.2843.

**Compound 16**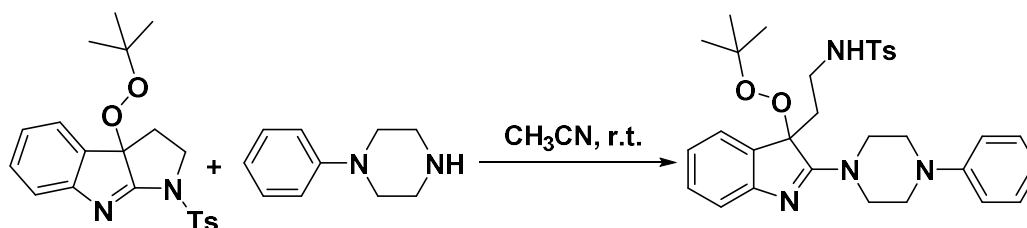***N*-(2-(3-(tert-butylperoxy)-2-(4-phenylpiperazin-1-yl)-3H-indol-3-yl) ethyl)-4-methylbenzenesulfonamide**

To a solution of 3a-(tert-butylperoxy)-1-tosyl-1,2,3,3a-tetrahydropyrrolo[2,3-b] indole (200 mg, 0.5 mmol) in CH<sub>3</sub>CN (5 mL) was added 1-phenylpiperazine (84  $\mu$ L, 0.55 mmol) to form a homogeneous solution. The mixture was stirred at r.t. for 4 h. TLC (petroleum ether:EtOAc = 4:1) indicated that the reaction was complete. Then concentrated to dryness under vacuum. The residue was purified by silica gel column chromatography (petroleum ether:EtOAc = 1:2) to give the desired product (267 mg, 95%) as a creamy white solid.

**Physical state:** creamy white solid.

**Melting point:** 103 - 105 °C.

**TLC:** R<sub>f</sub> = 0.50 (petroleum ether/EtOAc = 1:2).

**<sup>1</sup>H NMR (500 Hz, CDCl<sub>3</sub>)**  $\delta$  7.58 (d, *J* = 8.3 Hz, 2H), 7.33 – 7.28 (m, 2H), 7.22 (d, *J* = 8.5 Hz, 2H), 7.21 – 7.18 (m, 1H), 7.04 (d, *J* = 7.7 Hz, 1H), 7.02 – 6.99 (m, 1H), 6.97 (d, *J* = 7.6 Hz, 2H), 6.92 (t, *J* = 7.3 Hz, 1H), 6.89 – 6.85 (m, 1H), 4.52 (s, 1H), 4.03 (d, *J* = 5.8 Hz, 2H), 3.98 (s, 2H), 3.33 – 3.25 (m, 4H), 2.76 – 2.64 (m, 2H), 2.38 (s, 3H), 2.26 (t, *J* = 6.8 Hz, 2H), 1.10 (s, 9H).

**<sup>13</sup>C NMR (126 MHz, CDCl<sub>3</sub>)**  $\delta$  170.64, 153.99, 151.19, 143.55, 136.54, 133.35, 130.11, 129.80, 129.35, 127.14, 122.36, 121.38, 120.50, 116.72, 116.50, 91.32, 83.41, 49.60, 45.58, 38.44, 35.50, 26.55, 21.57.

**HRMS (ESI):** calcd for C<sub>31</sub>H<sub>39</sub>N<sub>4</sub>O<sub>4</sub>S [M + H]<sup>+</sup> *m/z*: 563.2687 found 563.2689

**Compound 17**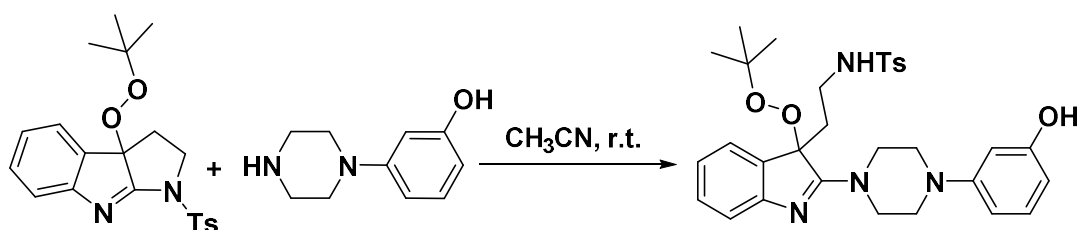***N*-(2-(3-(tert-butylperoxy)-2-(4-(3-hydroxyphenyl) piperazin-1-yl)-3H-indol-3-yl) ethyl)-4-methylbenzenesulfonamide**

To a solution of 3*a*-(tert-butylperoxy)-1-tosyl-1,2,3,3*a*-tetrahydropyrrolo[2,3-*b*] indole (200 mg, 0.5 mmol) 3-(piperazin-1-yl) phenol (98 mg, 0.55 mmol) in CH<sub>3</sub>CN (5 mL) to form a homogeneous solution. The mixture was stirred at r.t. for 6 h. TLC (petroleum ether:EtOAc = 4:1) indicated that the reaction was complete. Then concentrated to dryness under vacuum. The residue was purified by silica gel column chromatography (petroleum ether:EtOAc = 1:2) to give the desired product (260 mg, 90%) as a creamy white solid.

**Physical state:** creamy white solid.

**Melting point:** 114 - 116 °C.

**TLC:** R<sub>f</sub> = 0.56 (petroleum ether/EtOAc = 1:2).

**<sup>1</sup>H NMR (500 Hz, CDCl<sub>3</sub>)** δ 7.57 (d, *J* = 7.9 Hz, 2H), 7.18 (s, 1H), 7.17 (s, 1H), 7.16 (s, 1H), 7.05 (d, *J* = 6.6 Hz, 2H), 7.03 (s, 1H), 6.88 (t, *J* = 7.3 Hz, 1H), 6.42 (d, *J* = 8.3 Hz, 1H), 6.40 – 6.37 (m, 1H), 6.36 (s, 1H), 5.21 (s, 1H), 4.16 – 3.69 (m, 4H), 3.23 – 3.06 (m, 4H), 2.67 (d, *J* = 6.9 Hz, 2H), 2.34 (s, 3H), 2.25 (d, *J* = 7.0 Hz, 2H), 1.09 (s, 9H).

**<sup>13</sup>C NMR (126 MHz, CDCl<sub>3</sub>)** δ 170.33, 157.87, 152.75, 152.36, 143.64, 136.36, 132.78, 130.23, 130.15, 129.84, 127.13, 122.50, 121.70, 116.22, 108.35, 107.87, 104.10, 91.27, 80.84, 50.50, 44.24, 38.29, 35.52, 26.53, 21.57, 11.33.

**HRMS (ESI):** calcd for C<sub>31</sub>H<sub>39</sub>N<sub>4</sub>O<sub>5</sub>S [M + H]<sup>+</sup> *m/z*: 579.2636, found 579.2642.

### Compound 18

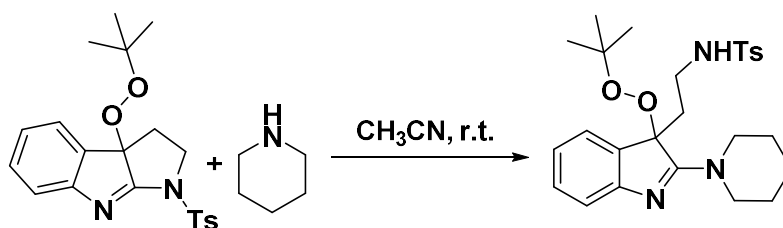

#### ***N*-(2-(3-(*tert*-butylperoxy)-2-(piperidin-1-yl)-3*H*-indol-3-yl) ethyl)-4-methylbenzenesulfonamide**

To a solution of 3*a*-(*tert*-butylperoxy)-1-tosyl-1,2,3,3*a*-tetrahydropyrrolo[2,3-*b*] indole (200 mg, 0.5 mmol) in CH<sub>3</sub>CN (5 mL) was added piperidine (50  $\mu$ L, 0.55 mmol) to form a homogeneous solution. The mixture was stirred at r.t. overnight. TLC (petroleum ether:EtOAc = 4:1) indicated that the reaction was complete. Then concentrated to dryness under vacuum. The residue was purified by silica gel column chromatography (petroleum ether:EtOAc = 2:1) to give the desired product (235 mg, 98%) as a creamy white solid.

**Physical state:** creamy white solid.

**Melting point:** 137 - 138 °C.

**TLC:** R<sub>f</sub> = 0.62 (CH<sub>2</sub>CH<sub>2</sub>/MeOH = 50:1).

**<sup>1</sup>H NMR (500 MHz, CDCl<sub>3</sub>)**  $\delta$  7.55 (d, *J* = 8.3 Hz, 2H), 7.19 (d, *J* = 8.0 Hz, 2H), 7.14 – 7.10 (m, 1H), 6.97 – 6.95 (m, 1H), 6.94 (d, *J* = 7.5 Hz, 1H), 6.81 – 6.76 (m, 1H), 5.11 (s, 1H), 3.73 (d, *J* = 20.7 Hz, 4H), 2.67 – 2.58 (m, 2H), 2.36 (s, 3H), 2.19 (t, *J* = 7.0 Hz, 2H), 1.64 (s, 4H), 1.08 (s, 9H).

**<sup>13</sup>C NMR (126 MHz CDCl<sub>3</sub>)**  $\delta$  170.51, 154.27, 143.37, 136.65, 133.20, 129.90, 129.71, 122.28, 120.77, 116.03, 91.23, 80.40, 46.81, 38.47, 35.41, 26.50, 26.14, 24.43, 21.55.

**HRMS (ESI):** calcd for C<sub>26</sub>H<sub>36</sub>N<sub>3</sub>O<sub>4</sub>S [M + H]<sup>+</sup> *m/z*: 486.2421, found 486.2417.

### Compound 19

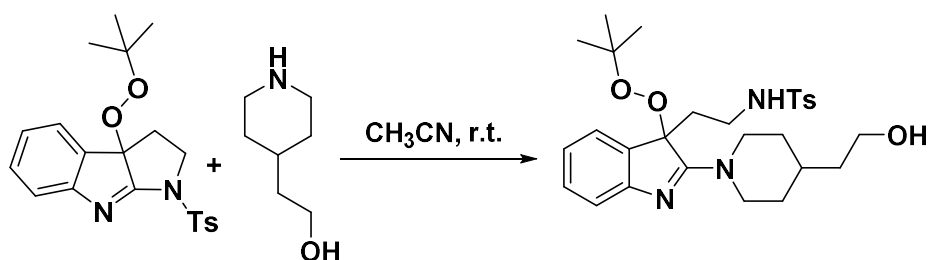

### *N*-(2-(3-(tert-butylperoxy)-2-(4-(2-hydroxyethyl) piperidin-1-yl)-3H-indol-3-yl) ethyl)-4-methylbenzenesulfonamide

To a solution of 3a-(tert-butylperoxy)-1-tosyl-1,2,3,3a-tetrahydropyrrolo[2,3-b] indole (160 mg, 0.4 mmol) 2-(piperidin-4-yl) ethan-1-ol (57 mg, 0.44 mmol) in CH<sub>3</sub>CN (4 mL) to form a homogeneous solution. The mixture was stirred at r.t. for 5h. TLC (petroleum ether:EtOAc = 4:1) indicated that the reaction was complete. Then concentrated to dryness under vacuum. The residue was purified by silica gel column chromatography (CH<sub>2</sub>CH<sub>2</sub>/MeOH = 20:1) to give the desired product (192 mg, 91%) as a creamy white solid.

**Physical state:** creamy white solid.

**Melting point:** 94 - 95 °C.

**TLC:** R<sub>f</sub> = 0.32 (petroleum ether/EtOAc = 1:1).

**<sup>1</sup>H NMR (500 MHz, CDCl<sub>3</sub>)** δ 7.55 (d, *J* = 8.3 Hz, 2H), 7.20 (d, *J* = 6.6 Hz, 2H), 7.16 – 7.11 (m, 1H), 6.97 (s, 1H), 6.95 (d, *J* = 6.6 Hz, 1H), 6.80 (t, *J* = 7.4 Hz, 1H), 5.16 (s, 1H), 4.53 (t, *J* = 17.1 Hz, 2H), 3.68 (t, *J* = 5.3 Hz, 2H), 3.03 (d, *J* = 19.5 Hz, 2H), 2.61 (s, 2H), 2.37 (s, 3H), 2.26 – 2.14 (m, 2H), 1.77 (d, *J* = 13.3 Hz, 2H), 1.72 (s, 1H), 1.57 – 1.47 (m, 2H), 1.35 (t, *J* = 10.7 Hz, 2H), 1.07 (s, 9H).

**<sup>13</sup>C NMR (126 MHz, CDCl<sub>3</sub>)** δ 170.51, 154.03, 143.43, 136.63, 133.10, 129.96, 129.78, 127.07, 122.31, 120.94, 115.99, 91.26, 80.48, 59.98, 46.17, 39.15, 38.44, 35.55, 32.44, 26.52, 21.58.

**HRMS (ESI):** calcd for C<sub>28</sub>H<sub>40</sub>N<sub>3</sub>O<sub>5</sub>S [M + H]<sup>+</sup> *m/z*: 530.2683, found 530.2680.



## Compound 20

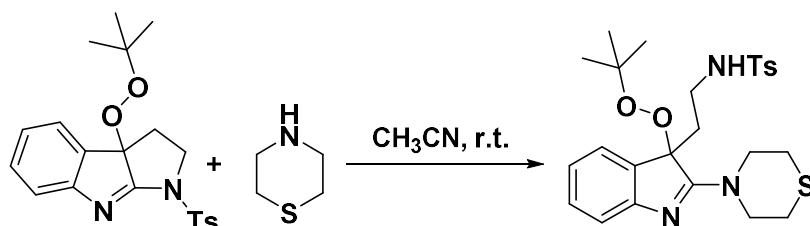

### *N*-(2-(3-(*tert*-butylperoxy)-2-thiomorpholino-3*H*-indol-3-yl) ethyl)-4-methylbenzenesulfonamide

To a solution of 3*a*-(*tert*-butylperoxy)-1-tosyl-1,2,3,3*a*-tetrahydropyrrolo[2,3-*b*] indole (120 mg, 0.3 mmol) in CH<sub>3</sub>CN (3 mL) was added thiomorpholine (33  $\mu$ L, 0.33 mmol) to form a homogeneous solution. The mixture was stirred at r.t. overnight. TLC (petroleum ether:EtOAc = 4:1) indicated that the reaction was complete. Then concentrated to dryness under vacuum. The residue was purified by silica gel column chromatography (petroleum ether:EtOAc = 2:1) to give the desired product (143 mg, 95%) as a creamy white solid.

**Physical state:** creamy white solid.

**Melting point:** 113 - 115  $^{\circ}$ C.

**TLC:** R<sub>f</sub> = 0.38 (petroleum ether/EtOAc = 1:2).

**<sup>1</sup>H NMR (500 Hz, CDCl<sub>3</sub>)**  $\delta$  7.58 (d, *J* = 7.8 Hz, 2H), 7.25 (d, *J* = 7.1 Hz, 2H), 7.19 (t, *J* = 7.5 Hz, 1H), 7.02 (d, *J* = 8.4 Hz, 1H), 6.99 (s, 1H), 6.86 (t, *J* = 7.4 Hz, 1H), 4.43 (d, *J* = 5.2 Hz, 1H), 4.04 (d, *J* = 43.1 Hz, 4H), 2.76 (s, 4H), 2.69 – 2.62 (m, 2H), 2.41 (s, 3H), 2.24 – 2.14 (m, 2H), 1.10 (s, 9H).

**<sup>13</sup>C NMR (126 MHz, CDCl<sub>3</sub>)**  $\delta$  170.43, 153.79, 143.59, 136.49, 133.27, 130.06, 129.79, 127.12, 122.39, 121.39, 116.52, 91.29, 81.99, 48.33, 38.38, 35.31, 27.60, 26.53, 21.60.

**HRMS (ESI):** calcd for C<sub>25</sub>H<sub>34</sub>N<sub>3</sub>O<sub>4</sub>S<sub>2</sub> [M + H]<sup>+</sup> *m/z*: 504.1985 found 504.1985.

### Compound 21

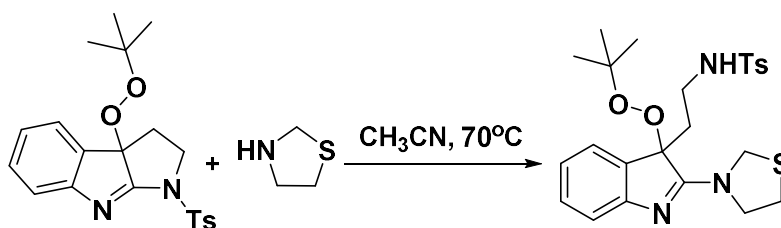

#### ***N*-(2-(3-(tert-butylperoxy)-2-(thiazolidin-3-yl)-3H-indol-3-yl) ethyl)-4-methylbenzenesulfonamide**

To a solution of 3a-(tert-butylperoxy)-1-tosyl-1,2,3,3a-tetrahydropyrrolo[2,3-b] indole (200 mg, 0.5 mmol) in CH<sub>3</sub>CN (5 mL) was added thiazolidine (43  $\mu$ L, 0.55 mmol) to form a homogeneous solution. The mixture was stirred at 70 °C for 3 h. TLC (petroleum ether:EtOAc = 4:1) indicated that the reaction was complete. Then concentrated to dryness under vacuum. The residue was purified by silica gel column chromatography (petroleum ether:EtOAc = 2:1) to give the desired product (184 mg, 75%) as a creamy white solid.

**Physical state:** creamy white solid.

**Melting point:** 70 - 72 °C.

**TLC:** R<sub>f</sub> = 0.56 (petroleum ether/EtOAc = 1:1).

**<sup>1</sup>H NMR (500 Hz, CDCl<sub>3</sub>)**  $\delta$  7.57 (d, *J* = 8.2 Hz, 2H), 7.21 (d, *J* = 7.9 Hz, 2H), 7.19 – 7.14 (m, 1H), 7.01 (s, 1H), 6.99 (d, *J* = 9.0 Hz, 1H), 6.86 (t, *J* = 7.2 Hz, 1H), 5.15 (s, 1H), 4.78 (s, 2H), 4.39 – 3.78 (m, 2H), 3.12 – 3.02 (m, 2H), 2.69 – 2.62 (m, 2H), 2.38 (s, 3H), 2.33 – 2.13 (m, 2H), 1.09 (s, 9H).

**<sup>13</sup>C NMR (126 MHz, DMSO-d<sub>6</sub>)**  $\delta$  169.04, 154.78, 143.37, 137.42, 133.91, 130.18, 127.10, 122.78, 121.74, 116.66, 90.69, 80.53, 79.71, 49.60, 37.76, 33.86, 30.55, 26.61, 21.49.

**HRMS (ESI):** calcd for C<sub>24</sub>H<sub>32</sub>N<sub>3</sub>O<sub>4</sub>S<sub>2</sub> [M + H]<sup>+</sup> *m/z*: 490.1829 found 490.1832.

## Compound 22

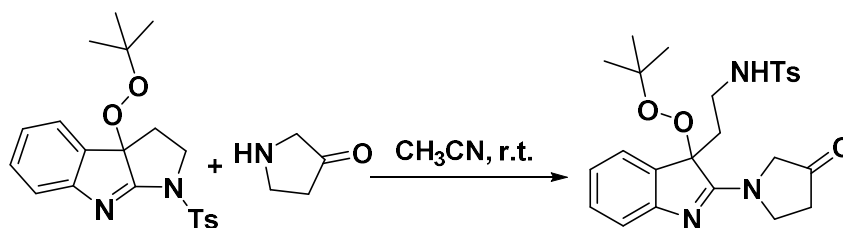

### ***N*-(2-(3-(tert-butylperoxy)-2-(3-oxopyrrolidin-1-yl)-3H-indol-3-yl) ethyl)-4-methylbenzenesulfonamide**

To a solution of 3a-(tert-butylperoxy)-1-tosyl-1,2,3,3a-tetrahydropyrrolo[2,3-b] indole (120 mg, 0.3 mmol) 3-pyrrolidinone (40 mg, 0.33 mmol) in CH<sub>3</sub>CN (3 mL) to form a homogeneous solution. The mixture was stirred at r.t. overnight. TLC (petroleum ether:EtOAc = 4:1) indicated that the reaction was complete. Then concentrated to dryness under vacuum. The residue was purified by silica gel column chromatography (petroleum ether:EtOAc = 1:1) to give the desired product (117 mg, 80%) as a black oil.

**Physical state:** black oil.

**TLC:** R<sub>f</sub> = 0.32 (petroleum ether/EtOAc = 1:2).

**<sup>1</sup>H NMR (500 Hz, CDCl<sub>3</sub>)** δ 7.58 (d, *J* = 7.9 Hz, 2H), 7.24 (d, *J* = 8.0 Hz, 2H), 7.20 (d, *J* = 7.5 Hz, 1H), 7.07 (d, *J* = 7.7 Hz, 1H), 7.03 (d, *J* = 7.2 Hz, 1H), 6.89 (t, *J* = 7.4 Hz, 1H), 4.74 (s, 1H), 4.23 (s, 2H), 4.14 (s, 1H), 2.85 – 2.75 (m, 1H), 2.75 – 2.65 (m, 2H), 2.64 – 2.54 (m, 1H), 2.39 (s, 3H), 2.35 (d, *J* = 4.4 Hz, 1H), 2.16 (s, 1H), 1.10 (s, 9H).

**<sup>13</sup>C NMR (126 MHz, CDCl<sub>3</sub>)** δ 210.74, 170.66, 154.14, 143.53, 136.67, 132.93, 130.19, 129.75, 127.01, 122.50, 121.89, 116.63, 91.32, 80.79, 53.43, 44.66, 38.24, 34.21, 29.76, 26.50, 21.54.

**HRMS (ESI):** calcd for C<sub>25</sub>H<sub>32</sub>N<sub>3</sub>O<sub>5</sub>S [M + H]<sup>+</sup> *m/z*: 486.2057, found 486.2057.

### Compound 23

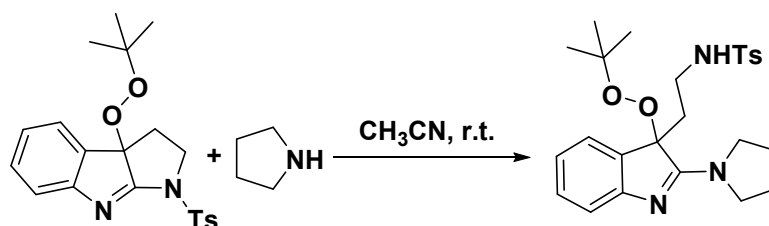

#### *N*-(2-(3-(*tert*-butylperoxy)-2-(pyrrolidin-1-yl)-3*H*-indol-3-yl) ethyl)-4-methylbenzenesulfonamide

To a solution of 3*a*-(*tert*-butylperoxy)-1-tosyl-1,2,3,3*a*-tetrahydropyrrolo[2,3-*b*] indole (200 mg, 0.5 mmol) in CH<sub>3</sub>CN (5 mL) was added pyrrolidine (46  $\mu$ L, 0.55 mmol) to form a homogeneous solution. The mixture was stirred at r.t. for 20 minutes. TLC (petroleum ether:EtOAc = 4:1) indicated that the reaction was complete. Then concentrated to dryness under vacuum. The residue was purified by silica gel column chromatography (CH<sub>2</sub>Cl<sub>2</sub>/MeOH = 20:1) to give the desired product (200 mg, 85%) as a creamy white solid.

**Physical state:** creamy white solid.

**Melting point:** 75 - 76 °C.

**TLC:** R<sub>f</sub> = 0.32 (CH<sub>2</sub>Cl<sub>2</sub>/MeOH = 20:1).

**<sup>1</sup>H NMR (500 Hz, CDCl<sub>3</sub>)**  $\delta$  7.59 (d, *J* = 8.3 Hz, 2H), 7.23 (d, *J* = 8.0 Hz, 2H), 7.19 – 7.14 (m, 1H), 7.04 (d, *J* = 7.7 Hz, 1H), 7.00 – 6.96 (m, 1H), 6.85 – 6.79 (m, 1H), 4.98 (s, 1H), 4.16 (s, 1H), 3.78 – 3.71 (m, 2H), 3.70 (d, *J* = 14.1 Hz, 1H), 2.75 (t, *J* = 6.7 Hz, 1H), 2.59 (t, *J* = 6.8 Hz, 1H), 2.48 – 2.42 (m, 1H), 2.39 (s, 3H), 2.20 – 2.14 (m, 1H), 2.11 – 2.03 (m, 1H), 1.98 (s, 2H), 1.11 (s, 9H).

**<sup>13</sup>C NMR (126 MHz, CD<sub>3</sub>OD)**  $\delta$  169.71, 154.35, 143.36, 136.70, 132.47, 130.02, 129.77, 127.06, 122.49, 120.96, 115.74, 91.13, 80.38, 46.27, 38.37, 34.02, 26.53, 24.02, 21.58.

**HRMS (ESI):** calcd for C<sub>25</sub>H<sub>34</sub>N<sub>3</sub>O<sub>4</sub>S [M + H]<sup>+</sup> *m/z*: 472.2265, found 472.2269.

## Compound 24

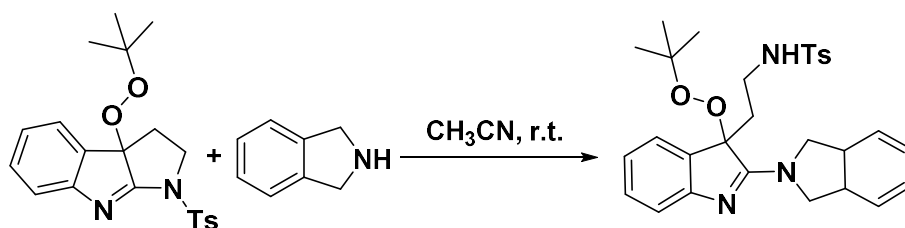

### ***N*-(2-(3-(tert-butylperoxy)-2-(1,3,3a,7a-tetrahydro-2H-isoindol-2-yl)-3H-indol-3-yl) ethyl)-4-methylbenzenesulfonamide**

To a solution of 3a-(tert-butylperoxy)-1-tosyl-1,2,3,3a-tetrahydropyrrolo[2,3-b] indole (200 mg, 0.5 mmol) and isoindoline (66 mg, 0.55 mmol) in CH<sub>3</sub>CN (5 mL) to form a homogeneous solution. The mixture was stirred at r.t. overnight. TLC (petroleum ether:EtOAc = 4:1) indicated that the reaction was complete. Then concentrated to dryness under vacuum. The residue was purified by silica gel column chromatography (petroleum ether:EtOAc = 2:1) to give the desired product (242 mg, 93%) as a creamy white solid.

**Physical state:** creamy white solid.

**Melting point:** 172 -174 °C.

**TLC:** R<sub>f</sub>=0.29 (petroleum ether/EtOAc = 1:2).

**<sup>1</sup>H NMR (500 Hz, CDCl<sub>3</sub>)** δ 7.52 (d, *J* = 6.5 Hz, 2H), 7.34 (s, 2H), 7.23 – 7.19 (m, 1H), 7.13 (d, *J* = 8.4 Hz, 2H), 7.09 (d, *J* = 7.7 Hz, 1H), 7.03 (d, *J* = 7.4 Hz, 1H), 6.87 (t, *J* = 7.4 Hz, 1H), 5.37 (d, *J* = 14.1 Hz, 1H), 5.10 (d, *J* = 14.6 Hz, 2H), 4.89 (d, *J* = 14.8 Hz, 1H), 4.64 (s, 1H), 2.79 – 2.70 (m, 2H), 2.47 – 2.39 (m, 1H), 2.34 (s, 3H), 2.32 – 2.26 (m, 1H), 1.10 (s, 9H).

**<sup>13</sup>C NMR (126 MHz, CDCl<sub>3</sub>)** δ 170.21, 154.95, 143.44, 136.50, 133.09, 130.13, 129.70, 127.64, 127.61, 127.07, 122.77, 122.55, 121.30, 116.58, 91.37, 80.60, 55.61, 51.95, 38.42, 33.48, 26.54, 21.54.

**HRMS (ESI):** calcd for C<sub>29</sub>H<sub>34</sub>N<sub>3</sub>O<sub>4</sub>S [M + H]<sup>+</sup> *m/z*: 520.2265, found 520.2272.

## Compound 25

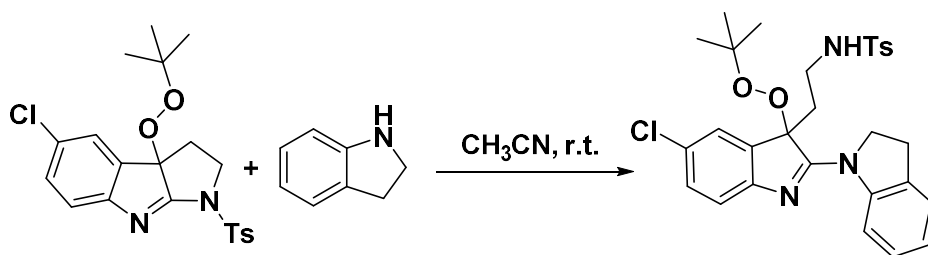

### *N*-(2-(3-(*tert*-butylperoxy)-5-chloro-2-(indolin-1-yl)-3*H*-indol-3-yl)ethyl)-4-methylbenzenesulfonamide

To a solution of 3a-(*tert*-butylperoxy)-5-chloro-1-tosyl-1,2,3,3a-tetrahydropyrrolo[2,3-*b*] indole (217 mg, 0.5 mmol) in CH<sub>3</sub>CN (5 mL) was added indoline (62  $\mu$ L, 0.55 mmol) to form a homogeneous solution. The mixture was stirred at r.t. for 5 h. TLC (petroleum ether:EtOAc = 4:1) indicated that the reaction was complete. Then concentrated to dryness under vacuum. The residue was purified by silica gel column chromatography (petroleum ether:EtOAc = 2:1) to give the desired product (266 mg, 96%) as a creamy white solid.

**Physical state:** creamy white solid.

**Melting point:** 105 - 107 °C.

**TLC:** R<sub>f</sub> = 0.80 (petroleum ether/EtOAc = 1:1).

**<sup>1</sup>H NMR (500 Hz, CDCl<sub>3</sub>)**  $\delta$  8.45 (d, *J* = 8.2 Hz, 1H), 7.50 (d, *J* = 8.3 Hz, 2H), 7.27 (d, *J* = 4.6 Hz, 1H), 7.26 – 7.24 (m, 1H), 7.19 – 7.17 (m, 1H), 7.13 (d, *J* = 8.0 Hz, 2H), 7.08 – 7.05 (m, 1H), 7.05 – 7.03 (m, 1H), 7.00 (d, *J* = 2.1 Hz, 1H), 4.67 – 4.60 (m, 1H), 4.46 (s, 1H), 4.37 – 4.30 (m, 1H), 3.29 – 3.15 (m, 2H), 2.78 – 2.63 (m, 2H), 2.45 – 2.39 (m, 1H), 2.37 (s, 3H), 2.32 – 2.24 (m, 1H), 1.12 (s, 9H).

**<sup>13</sup>C NMR (126 MHz, CDCl<sub>3</sub>)**  $\delta$  167.83, 153.34, 144.15, 143.68, 136.03, 134.67, 131.89, 129.93, 129.83, 127.58, 127.16, 127.11, 124.66, 123.54, 122.49, 118.39, 117.49, 92.31, 80.89, 62.72, 47.91, 38.22, 33.79, 28.77, 26.54, 21.64.

**HRMS (ESI):** calcd for C<sub>29</sub>H<sub>33</sub>ClN<sub>3</sub>O<sub>4</sub>S [M + H]<sup>+</sup> *m/z*: 554.1875, found 554.1876.

## Compound 26

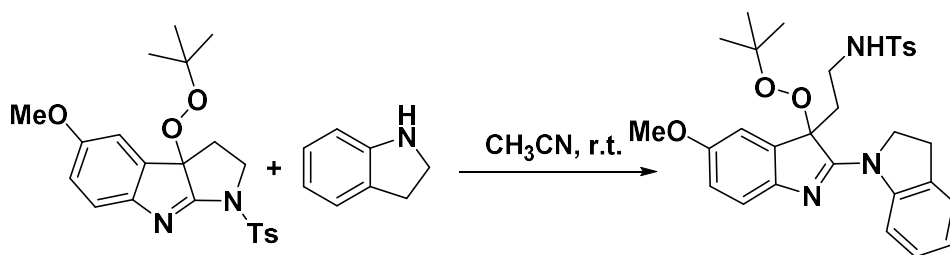

### *N*-(2-(3-(tert-butylperoxy)-2-(indolin-1-yl)-5-methoxy-3H-indol-3-yl) ethyl)-4-methylbenzenesulfonamide

To a solution of 3a-(tert-butylperoxy)-5-methoxy-1-tosyl-1,2,3,3a-tetrahydropyrrolo[2,3-b] indole (215 mg, 0.5 mmol) in CH<sub>3</sub>CN (5 mL) was added indoline (62  $\mu$ L, 0.55 mmol) to form a homogeneous solution. The mixture was stirred at r.t. for 5 h. TLC (petroleum ether:EtOAc = 4:1) indicated that the reaction was complete. Then concentrated to dryness under vacuum. The residue was purified by silica gel column chromatography (petroleum ether:EtOAc = 2:1) to give the desired product (264 mg, 96%) as a creamy white solid.

**Physical state:** creamy white solid.

**Melting point:** 137 - 139 °C.

**TLC:** R<sub>f</sub>=0.50 (petroleum ether/EtOAc = 1:1).

**<sup>1</sup>H NMR (500 Hz, CDCl<sub>3</sub>)**  $\delta$  8.43 – 8.38 (m, 1H), 7.47 (d, *J* = 8.2 Hz, 2H), 7.23 (d, *J* = 7.5 Hz, 2H), 7.11 (d, *J* = 2.9 Hz, 1H), 7.09 (d, *J* = 3.4 Hz, 1H), 7.08 – 7.05 (m, 1H), 7.03 – 6.98 (m, 1H), 6.79 – 6.74 (m, 1H), 6.71 (t, *J* = 3.3 Hz, 1H), 4.63 – 4.54 (m, 1H), 4.44 (s, 1H), 4.33 – 4.25 (m, 1H), 3.78 (s, 3H), 3.19 (d, *J* = 8.1 Hz, 2H), 2.78 – 2.62 (m, 2H), 2.36 (s, 3H), 2.35 – 2.21 (m, 2H), 1.12 (s, 9H).

**<sup>13</sup>C NMR (126 MHz, CDCl<sub>3</sub>)**  $\delta$  166.68, 155.78, 147.91, 144.52, 143.45, 136.26, 134.31, 131.62, 129.74, 127.51, 127.09, 124.51, 122.88, 117.75, 117.04, 114.09, 109.69, 92.51, 80.63, 55.87, 47.92, 38.31, 34.01, 28.75, 26.60, 21.59.

**HRMS (ESI):** calcd for C<sub>30</sub>H<sub>36</sub>N<sub>3</sub>O<sub>5</sub>S [M + H]<sup>+</sup> *m/z*: 550.2370, found 550.2368.

### Compound 27

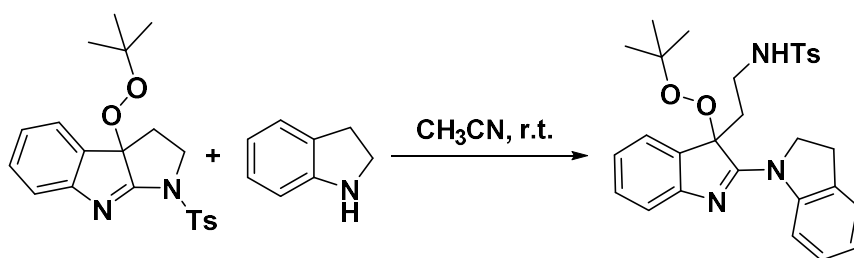

#### ***N*-(2-(3-(tert-butylperoxy)-2-(indolin-1-yl)-3H-indol-3-yl)ethyl)-4-methylbenzenesulfonamide**

To a solution of 3a-(tert-butylperoxy)-1-tosyl-1,2,3,3a-tetrahydropyrrolo[2,3-b] indole (200 mg, 0.5 mmol) in CH<sub>3</sub>CN (5 mL) was added indoline (62  $\mu$ L, 0.55 mmol) to form a homogeneous solution. The mixture was stirred at r.t. for 1 h. TLC (petroleum ether:EtOAc = 4:1) indicated that the reaction was complete. Then concentrated to dryness under vacuum. The residue was purified by silica gel column chromatography (petroleum ether:EtOAc = 2:1) to give the desired product (252 mg, 97%) as a creamy white solid.

**Physical state:** creamy white solid.

**Melting point:** 83 - 85 °C.

**TLC:** R<sub>f</sub> = 0.58 (petroleum ether/EtOAc = 1:1).

**<sup>1</sup>H NMR (500 Hz, CDCl<sub>3</sub>)**  $\delta$  8.46 (d, *J* = 8.0 Hz, 1H), 7.48 (d, *J* = 8.3 Hz, 2H), 7.25 (d, *J* = 2.0 Hz, 1H), 7.24 (d, *J* = 3.4 Hz, 1H), 7.24 – 7.21 (m, 1H), 7.16 – 7.14 (m, 1H), 7.13 (d, *J* = 7.7 Hz, 2H), 7.08 – 7.05 (m, 1H), 7.05 – 7.01 (m, 1H), 6.94 – 6.91 (m, 1H), 4.68 – 4.61 (m, 1H), 4.36 – 4.29 (m, 2H), 3.26 – 3.14 (m, 2H), 2.82 – 2.66 (m, 2H), 2.38 (s, 3H), 2.37 – 2.28 (m, 2H), 1.11 (s, 9H).

**<sup>13</sup>C NMR (126 MHz, CDCl<sub>3</sub>)**  $\delta$  167.77, 154.72, 144.41, 143.45, 136.29, 132.85, 131.79, 130.04, 129.73, 127.53, 127.12, 124.54, 123.20, 122.32, 122.08, 117.63, 117.44, 92.42, 80.61, 47.93, 38.38, 33.82, 28.78, 26.58, 21.59.

**HRMS (ESI):** calcd for C<sub>29</sub>H<sub>34</sub>N<sub>3</sub>O<sub>4</sub>S [M + H]<sup>+</sup> *m/z*: 520.2265, found 520.2271.



## Compound 28

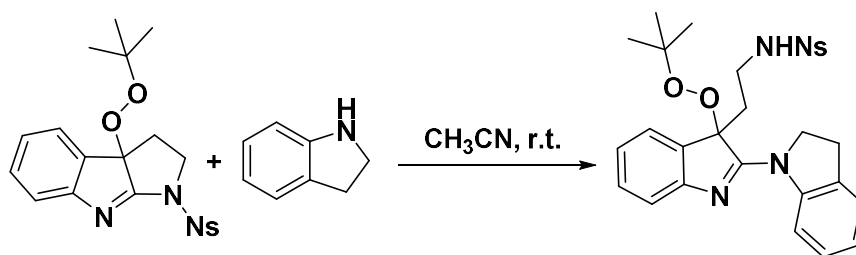

### *N*-(2-(3-(tert-butylperoxy)-2-(indolin-1-yl)-3H-indol-3-yl)ethyl)-4-nitrobenzenesulfonamide

To a solution of 3a-(tert-butylperoxy)-1-((4-nitrophenyl)sulfonyl)-1,2,3,3a-tetrahydropyrrolo[2,3-b]indole (216 mg, 0.5 mmol) in CH<sub>3</sub>CN (5 mL) was added indoline (62 μL, 0.55 mmol) to form a homogeneous solution. The mixture was stirred at r.t. for 2 h. TLC (petroleum ether:EtOAc = 4:1) indicated that the reaction was complete. Then concentrated to dryness under vacuum. The residue was purified by silica gel column chromatography (petroleum ether:EtOAc = 1:2) to give the desired product (252 mg, 97%) as a yellow solid.

**Physical state:** yellow solid.

**Melting point:** 80 - 82 °C.

**TLC:** R<sub>f</sub> = 0.68 (petroleum ether/EtOAc = 1:1).

**<sup>1</sup>H NMR (500 Hz, CDCl<sub>3</sub>)** δ 8.38 (d, *J* = 8.1 Hz, 1H), 8.09 (d, *J* = 8.8 Hz, 2H), 7.66 (d, *J* = 8.8 Hz, 2H), 7.26 (d, *J* = 1.4 Hz, 1H), 7.25 – 7.23 (m, 1H), 7.20 (d, *J* = 7.3 Hz, 1H), 7.14 – 7.13 (m, 1H), 7.12 (d, *J* = 4.1 Hz, 1H), 7.05 – 7.02 (m, 1H), 6.99 – 6.95 (m, 1H), 5.06 (d, *J* = 6.4 Hz, 1H), 4.66 – 4.59 (m, 1H), 4.38 – 4.32 (m, 1H), 3.25 – 3.18 (m, 2H), 2.73 – 2.64 (m, 2H), 2.52 – 2.46 (m, 1H), 2.33 – 2.27 (m, 1H), 1.10 (s, 9H).

**<sup>13</sup>C NMR (126 MHz, CDCl<sub>3</sub>)** δ 167.73, 154.52, 149.95, 145.00, 144.20, 132.74, 131.82, 130.29, 128.27, 127.59, 124.76, 124.33, 123.55, 122.36, 122.26, 117.67, 117.23, 92.27, 80.77, 48.06, 38.57, 33.85, 28.73, 26.54.

**HRMS (ESI):** calcd for C<sub>28</sub>H<sub>31</sub>N<sub>4</sub>O<sub>6</sub>S [M + H]<sup>+</sup> *m/z*: 551.1959, found 551.1960.

## Compound 29

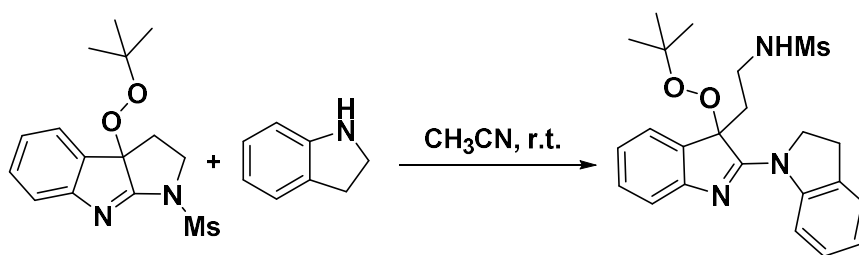

### ***N*-(2-(3-(tert-butylperoxy)-2-(indolin-1-yl)-3H-indol-3-yl)ethyl) methanesulfonamide**

To a solution of 3a-(tert-butylperoxy)-1-(methanesulfonyl)-1,2,3,3a-tetrahydropyrrolo[2,3-b] indole (162 mg, 0.5 mmol) in CH<sub>3</sub>CN (5 mL) was added indoline (62 μL, 0.55 mmol) to form a homogeneous solution. The mixture was stirred at r.t. for 2 h. TLC (petroleum ether:EtOAc = 4:1) indicated that the reaction was complete. Then concentrated to dryness under vacuum. The residue was purified by silica gel column chromatography (petroleum ether:EtOAc = 2:1) to give the desired product (215 mg, 97%) as a creamy white solid.

**Physical state:** creamy white solid.

**Melting point:** 75 - 77 °C.

**TLC:** R<sub>f</sub> = 0.38 (petroleum ether/EtOAc = 1:1).

**<sup>1</sup>H NMR (500 MHz, CDCl<sub>3</sub>)** δ 7.30 – 7.27 (m, 1H), 7.25 (s, 1H), 7.23 (d, *J* = 1.3 Hz, 1H), 7.22 – 7.21 (m, 1H), 7.19 (d, *J* = 1.2 Hz, 1H), 7.04 – 7.01 (m, 1H), 7.01 – 6.97 (m, 1H), 4.76 – 4.67 (m, 1H), 4.46 – 4.37 (m, 1H), 4.20 – 4.09 (m, 1H), 3.24 (t, *J* = 8.3 Hz, 2H), 3.02 – 2.86 (m, 2H), 2.73 (s, 3H), 2.52 – 2.30 (m, 2H), 1.26 (d, *J* = 17.2 Hz, 3H), 1.12 (s, 9H).

**<sup>13</sup>C NMR (126 MHz, CDCl<sub>3</sub>)** δ 167.88, 154.85, 144.39, 133.01, 131.90, 130.24, 127.56, 124.62, 123.31, 122.36, 122.24, 117.61, 117.41, 92.43, 80.66, 48.05, 40.01, 38.55, 34.45, 28.77, 26.58.

**HRMS (ESI):** calcd for C<sub>23</sub>H<sub>30</sub>N<sub>3</sub>O<sub>4</sub>S [M + H]<sup>+</sup> *m/z*: 444.1952, found 444.1948.

### Compound 30

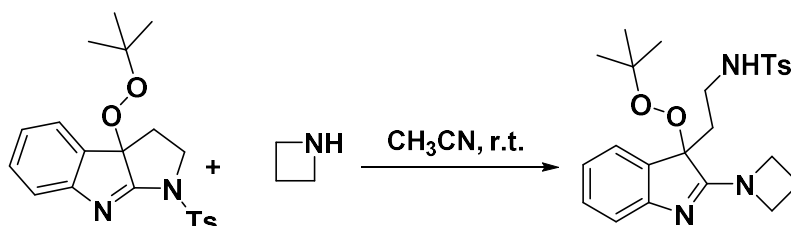

#### ***N*-(2-(2-(azetidin-1-yl)-3-(tert-butylperoxy)-3H-indol-3-yl) ethyl)-4-methylbenzenesulfonamide**

To a solution of *3a*-(tert-butylperoxy)-1-tosyl-1,2,3,3a-tetrahydropyrrolo[2,3-*b*] indole (120 mg, 0.3 mmol) and azetidine (31 mg, 0.33 mmol) in CH<sub>3</sub>CN (3 mL) to form a homogeneous solution. The mixture was stirred at r.t. for 6 h. TLC (petroleum ether:EtOAc = 4:1) indicated that the reaction was complete. Then concentrated to dryness under vacuum. The residue was purified by silica gel column chromatography (petroleum ether:EtOAc = 1:2) to give the desired product (135 mg, 98%) as a creamy white solid.

**Physical state:** creamy white solid.

**Melting point:** 139 – 141 °C.

**TLC:** R<sub>f</sub> = 0.22 (petroleum ether/EtOAc = 1:2).

**<sup>1</sup>H NMR (500 MHz, CDCl<sub>3</sub>)** δ 7.61 (d, *J* = 8.3 Hz, 2H), 7.24 (d, *J* = 8.1 Hz, 2H), 7.18 – 7.14 (m, 1H), 7.01 (d, *J* = 7.7 Hz, 1H), 6.96 (d, *J* = 6.0 Hz, 1H), 6.81 (t, *J* = 7.9 Hz, 1H), 4.76 (s, 1H), 4.53 – 4.39 (m, 2H), 4.38 – 4.31 (m, 1H), 2.78 – 2.69 (m, 2H), 2.46 (s, 2H), 2.40 (s, 3H), 2.22 – 2.14 (m, 2H), 1.12 (s, 9H).

**<sup>13</sup>C NMR (126 MHz, CDCl<sub>3</sub>)** δ 171.09, 155.13, 143.37, 136.77, 132.41, 130.13, 129.72, 127.09, 122.79, 121.06, 116.28, 91.00, 80.46, 77.42, 77.17, 76.91, 51.62, 38.37, 33.97, 26.53, 21.56, 17.79.

**HRMS (ESI):** calcd for C<sub>24</sub>H<sub>32</sub>N<sub>3</sub>O<sub>4</sub>S [M + H]<sup>+</sup> *m/z*: 458.2108, found 458.2110.

**Compound 31**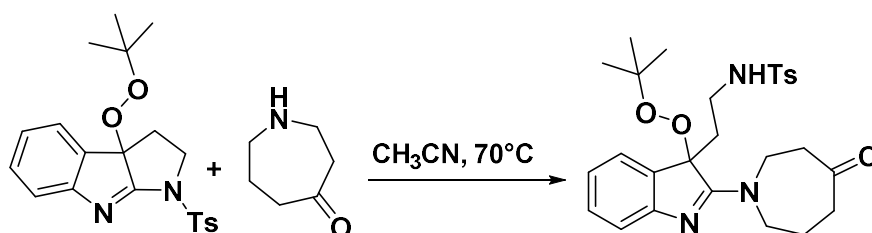***N*-(2-(3-(tert-butylperoxy)-2-(4-oxoazepan-1-yl)-3H-indol-3-yl)ethyl)-4-methylbenzenesulfonamide**

To a solution of 3a-(tert-butylperoxy)-1-tosyl-1,2,3,3a-tetrahydropyrrolo[2,3-b] indole (120 mg, 0.3 mmol) and azepan-4-one (49 mg, 0.33 mmol) in CH<sub>3</sub>CN (3 mL) to form a homogeneous solution. The mixture was stirred at 70°C for 1 h. TLC (petroleum ether:EtOAc = 4:1) indicated that the reaction was complete. Then concentrated to dryness under vacuum. The residue was purified by silica gel column chromatography (petroleum ether:EtOAc = 1:1) to give the desired product (137 mg, 89%) as a yellow oil.

**Physical state:** yellow oil.

**TLC:** R<sub>f</sub> = 0.26 (petroleum ether/EtOAc = 1:1).

**<sup>1</sup>H NMR (500 Hz, CDCl<sub>3</sub>)** δ 7.55 (d, *J* = 7.9 Hz, 2H), 7.22 (d, *J* = 8.0 Hz, 2H), 7.19 – 7.15 (m, 1H), 7.02 (s, 1H), 7.00 (d, *J* = 7.6 Hz, 1H), 6.85 (t, *J* = 7.4 Hz, 1H), 4.83 (s, 1H), 4.35 – 3.93 (m, 2H), 3.81 (t, *J* = 34.6 Hz, 2H), 2.95 (d, *J* = 34.3 Hz, 1H), 2.71 (d, *J* = 6.2 Hz, 2H), 2.69 (s, 1H), 2.61 – 2.55 (m, 2H), 2.38 (s, 3H), 2.25 (t, *J* = 7.0 Hz, 2H), 1.99 (d, *J* = 22.6 Hz, 2H), 1.08 (s, 9H).

**<sup>13</sup>C NMR (126 MHz, CDCl<sub>3</sub>)** δ 211.81, 170.15, 153.94, 143.54, 136.56, 133.31, 130.10, 129.77, 127.06, 122.09, 121.38, 116.59, 91.51, 80.91, 50.37, 42.73, 38.45, 35.34, 26.54, 21.57.

**HRMS (ESI):** calcd for C<sub>27</sub>H<sub>36</sub>N<sub>3</sub>O<sub>5</sub>S [M + H]<sup>+</sup> *m/z*: 514.2370, found 514.2375.

### Compound 32

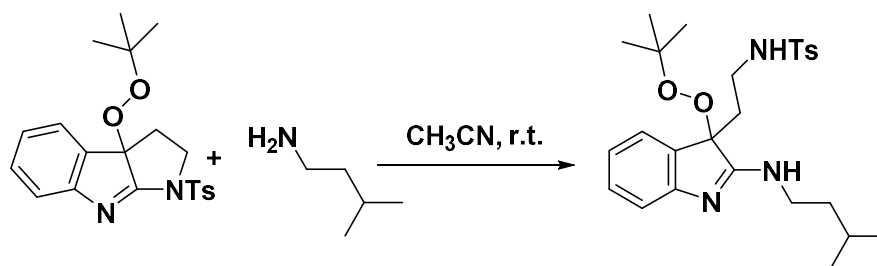

### *N*-(2-(3-(tert-butylperoxy)-2-(isopentylamino)-3H-indol-3-yl)ethyl)-4-methylbenzenesulfonamide

To a solution of 3a-(tert-butylperoxy)-1-tosyl-1,2,3,3a-tetrahydropyrrolo[2,3-b] indole (120 mg, 0.3 mmol) in CH<sub>3</sub>CN (3 mL) was added 3-methylbutan-1-amine (38  $\mu$ L, 0.33 mmol) to form a homogeneous solution. The mixture was stirred at r.t. for 1 h. TLC (petroleum ether:EtOAc = 4:1) indicated that the reaction was complete. Then concentrated to dryness under vacuum. The residue was purified by silica gel column chromatography (petroleum ether:EtOAc = 2:1) to give the desired product (142 mg, 97%) as a creamy white solid.

**Physical state:** creamy white solid.

**Melting point:** 79 – 82 °C.

**TLC:** R<sub>f</sub> = 0.37 (petroleum ether/EtOAc = 1:1).

**<sup>1</sup>H NMR (500 Hz, CDCl<sub>3</sub>)**  $\delta$  7.63 (d, *J* = 8.3 Hz, 2H), 7.28 (d, *J* = 8.2 Hz, 2H), 7.23 – 7.19 (m, 1H), 7.10 (d, *J* = 7.7 Hz, 1H), 6.94 – 6.90 (m, 1H), 6.85 – 6.81 (m, 1H), 5.18 (s, 1H), 4.70 (s, 1H), 3.56 – 3.48 (m, 1H), 3.48 – 3.40 (m, 1H), 2.91 – 2.84 (m, 1H), 2.84 – 2.74 (m, 1H), 2.42 (s, 3H), 2.29 – 2.20 (m, 1H), 2.07 – 2.00 (m, 1H), 1.74 – 1.67 (m, 1H), 1.58 – 1.49 (m, 2H), 1.17 (s, 9H), 0.96 (d, *J* = 1.5 Hz, 3H), 0.95 (d, *J* = 1.4 Hz, 3H).

**<sup>13</sup>C NMR (126 MHz, CDCl<sub>3</sub>)**  $\delta$  172.46, 155.86, 143.51, 136.64, 131.97, 130.45, 129.74, 127.13, 123.07, 121.30, 117.01, 90.16, 80.88, 41.00, 38.17, 35.07, 26.49, 25.92, 22.53, 21.57.

**HRMS (ESI):** calcd for C<sub>26</sub>H<sub>38</sub>N<sub>3</sub>O<sub>4</sub>S [M + H]<sup>+</sup> *m/z*: 488.2578, found 488.2586.

**Compound 33**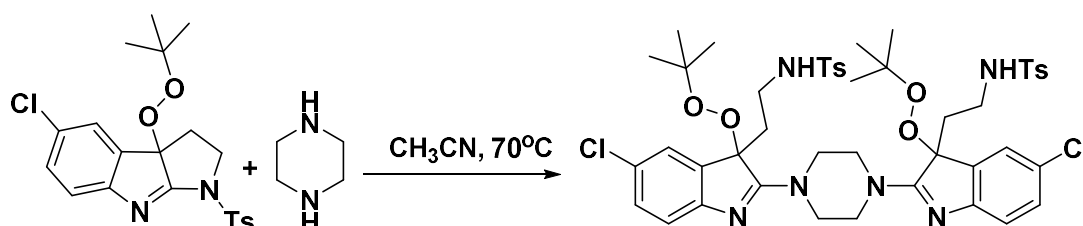***N, N'*-((piperazine-1,4-diylbis(3-(tert-butylperoxy)-5-chloro-3H-indole-2,3-diyl)) bis(ethane-2,1-diyl)) bis(4-methylbenzenesulfonamide)**

To a solution of 3a-(tert-butylperoxy)-5-chloro-1-tosyl-1,2,3,3a-tetrahydropyrrolo[2,3-b] indole (174 mg, 0.4 mmol) piperazine and (17 mg, 0.2 mmol) in CH<sub>3</sub>CN (4 mL) to form a homogeneous solution. The mixture was stirred at 70 °C for 4 h. TLC (petroleum ether:EtOAc = 4:1) indicated that the reaction was complete. Then concentrated to dryness under vacuum. The residue was purified by silica gel column chromatography (petroleum ether: EtOAc = 4:1) to give the desired product (126 mg, 66%) as a creamy white oil.

**Physical state:** creamy white oil.

**TLC:** R<sub>f</sub> = 0.56 (petroleum ether/EtOAc = 1:2).

**<sup>1</sup>H NMR (500 MHz, CDCl<sub>3</sub>)** δ 7.58 – 7.52 (m, 4H), 7.24 – 7.18 (m, 4H), 7.15 – 7.11 (m, 2H), 6.99 – 6.96 (m, 2H), 6.91 – 6.88 (m, 2H), 5.11 (s, 1H), 4.43 – 3.53 (m, 7H), 2.69 – 2.54 (m, 4H), 2.36 (s, 6H), 2.32 – 2.18 (m, 4H), 1.11 (s, 18H).

**<sup>13</sup>C NMR (126 MHz CDCl<sub>3</sub>)** δ 170.71, 152.63, 143.74, 136.28, 135.20, 129.99, 129.88, 127.05, 126.62, 122.56, 117.29, 91.21, 81.10, 45.36, 38.24, 35.55, 26.49, 21.59.

**HRMS (ESI):** calcd for C<sub>46</sub>H<sub>57</sub>Cl<sub>2</sub>N<sub>6</sub>O<sub>8</sub>S<sub>2</sub> [M + H]<sup>+</sup> m/z: 955.3051, found 955.3053.

### Compound 34

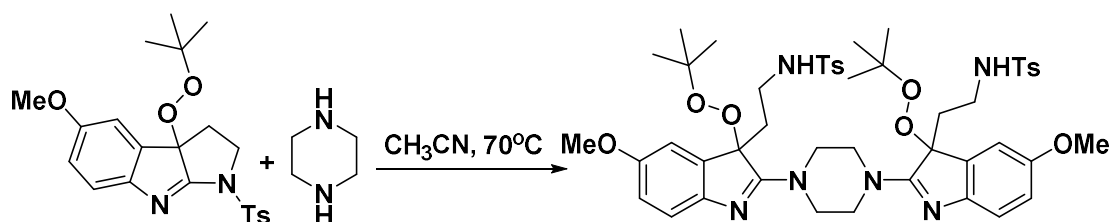

### *N, N'*-((piperazine-1,4-diylbis(3-(tert-butylperoxy)-5-methoxy-3H-indole-2,3-diyl)) bis(ethane-2,1-diyl)) bis(4-methylbenzenesulfonamide)

To a solution of 3a-(tert-butylperoxy)-5-methoxy-1-tosyl-1,2,3,3a-tetrahydropyrrolo[2,3-b] indole (172 mg, 0.4 mmol) and piperazine (17 mg, 0.2 mmol) in CH<sub>3</sub>CN (4 mL) to form a homogeneous solution. The mixture was stirred at 70 °C for 4 h. TLC (petroleum ether:EtOAc = 4:1) indicated that the reaction was complete. Then concentrated to dryness under vacuum. The residue was purified by silica gel column chromatography (CH<sub>2</sub>CH<sub>2</sub>/MeOH = 50:1) to give the desired product (125 mg, 66%) as a creamy white oil.

**Physical state:** creamy white oil.

**TLC:** R<sub>f</sub> = 0.39 (CH<sub>2</sub>CH<sub>2</sub>/MeOH = 20:1).

**<sup>1</sup>H NMR (500 MHz, CDCl<sub>3</sub>)** δ 7.55 – 7.51 (m, 4H), 7.18 (t, *J* = 8.4 Hz, 4H), 6.92 – 6.87 (m, 2H), 6.73 – 6.69 (m, 2H), 6.68 (d, *J* = 2.6 Hz, 2H), 5.13 (s, 2H), 3.94 (s, 8H), 3.74 (s, 6H), 2.69 – 2.55 (m, 4H), 2.35 (s, 6H), 2.27 – 2.16 (m, 4H), 1.11 (s, 18H).

**<sup>13</sup>C NMR (126 MHz CDCl<sub>3</sub>)** δ 169.67, 155.35, 147.14, 143.51, 136.50, 134.76, 129.85, 129.72, 116.60, 114.31, 109.67, 91.43, 80.81, 55.89, 44.57, 38.30, 35.73, 26.55, 21.54.

**HRMS (ESI):** calcd for C<sub>48</sub>H<sub>63</sub>N<sub>6</sub>O<sub>10</sub>S<sub>2</sub> [M + H]<sup>+</sup> *m/z*: 947.4042, found 947.4042.

**Compound 35**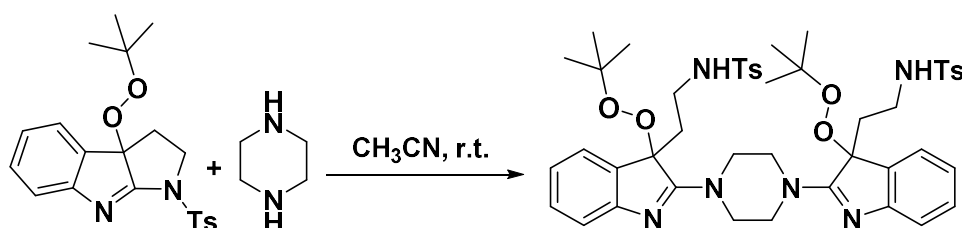***N, N'*-((piperazine-1,4-diylbis(3-(tert-butylperoxy)-3H-indole-2,3-diyl)) bis(ethane-2,1-diyl)) bis(4-methylbenzenesulfonamide)**

To a solution of 3a-(tert-butylperoxy)-1-tosyl-1,2,3,3a-tetrahydropyrrolo[2,3-b] indole (200 mg, 0.5 mmol) and piperazine (22 mg, 0.25 mmol) in CH<sub>3</sub>CN (5 mL) to form a homogeneous solution. The mixture was stirred at r.t overnight. TLC (petroleum ether:EtOAc = 4:1) indicated that the reaction was complete. Then concentrated to dryness under vacuum. The residue was purified by silica gel column chromatography (petroleum ether:EtOAc = 2:1) to give the desired product (170 mg, 70%) as a creamy white solid.

**Physical state:** creamy white solid.

**Melting point:** 120 - 122 °C.

**TLC:** R<sub>f</sub> = 0.16 (petroleum ether/EtOAc = 1:2).

**<sup>1</sup>H NMR (500 MHz, CDCl<sub>3</sub>)** δ 7.55 (d, *J* = 8.0 Hz, 4H), 7.22 (d, *J* = 7.5 Hz, 4H), 7.20 (s, 2H), 7.05 (s, 2H), 7.03 (d, *J* = 6.7 Hz, 2H), 6.89 (t, *J* = 7.5 Hz, 2H), 4.75 (s, 2H), 4.11 (t, *J* = 36.4 Hz, 8H), 2.71 – 2.59 (m, 4H), 2.38 (s, 6H), 2.35 – 2.22 (m, 4H), 1.12 (s, 18H).

**<sup>13</sup>C NMR (126 MHz, CDCl<sub>3</sub>)** δ 170.63, 170.51, 153.92, 143.55, 143.51, 136.56, 136.48, 133.32, 133.26, 130.11, 129.80, 129.77, 127.05, 127.03, 122.40, 121.53, 116.53, 116.46, 91.34, 89.36, 84.44, 45.62, 38.39, 35.69, 35.53, 26.53, 21.58.

**HRMS (ESI):** calcd for C<sub>46</sub>H<sub>59</sub>N<sub>6</sub>O<sub>8</sub>S<sub>2</sub> [M + H]<sup>+</sup> *m/z*: 887.3830, found 887.3830.



**Compound 36**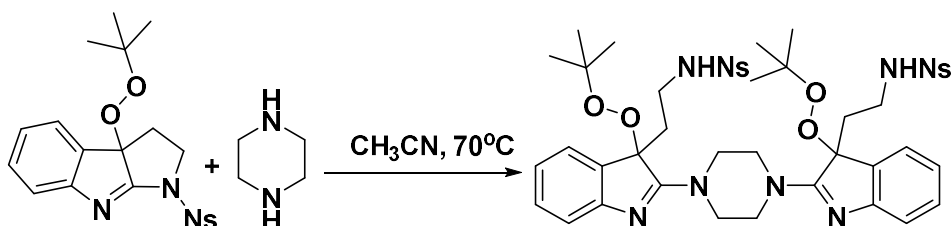***N, N'*-((piperazine-1,4-diylbis(3-(tert-butylperoxy)-3H-indole-2,3-diyl)) bis(ethane-2,1-diyl)) bis(4-nitrobenzenesulfonamide)**

To a solution of 3a-(tert-butylperoxy)-1-((4-nitrophenyl)sulfonyl)-1,2,3,3a-tetrahydropyrrolo[2,3-b]indole (173 mg, 0.4 mmol) and piperazine (17 mg, 0.2 mmol) in CH<sub>3</sub>CN (4 mL) to form a homogeneous solution. The mixture was stirred at 70 °C for 4h. TLC (petroleum ether:EtOAc = 4:1) indicated that the reaction was complete. Then concentrated to dryness under vacuum. The residue was purified by silica gel column chromatography (petroleum ether: EtOAc = 1:2) to give the desired product (133 mg, 70%) as a yellow solid.

**Physical state:** yellow solid.

**Melting point:** 122 - 124 °C.

**TLC:** R<sub>f</sub> = 0.26 (petroleum ether/EtOAc = 1:1).

**<sup>1</sup>H NMR (500 MHz, CDCl<sub>3</sub>)** δ 8.21 (t, *J* = 8.8 Hz, 4H), 7.84 – 7.78 (m, 4H), 7.22 – 7.17 (m, 2H), 7.09 (d, *J* = 8.5 Hz, 2H), 6.97 (d, *J* = 7.7 Hz, 2H), 6.94 – 6.89 (m, 2H), 5.60 (s, 1H), 4.12 (d, *J* = 53.9 Hz, 8H), 2.72 – 2.66 (m, 2H), 2.65 – 2.56 (m, 2H), 2.43 – 2.34 (m, 2H), 2.32 – 2.24 (m, 2H), 1.12 (s, 16H).

**<sup>13</sup>C NMR (126 MHz, CDCl<sub>3</sub>)** δ 170.57, 153.61, 150.02, 145.28, 133.11, 130.30, 128.28, 124.44, 122.41, 121.85, 116.37, 91.19, 81.02, 45.51, 38.57, 35.69, 26.51.

**HRMS (ESI):** calcd for C<sub>44</sub>H<sub>53</sub>N<sub>8</sub>O<sub>12</sub>S<sub>2</sub> [M + H]<sup>+</sup> *m/z*: 949.3219, found 949.3219.

**Compound 37**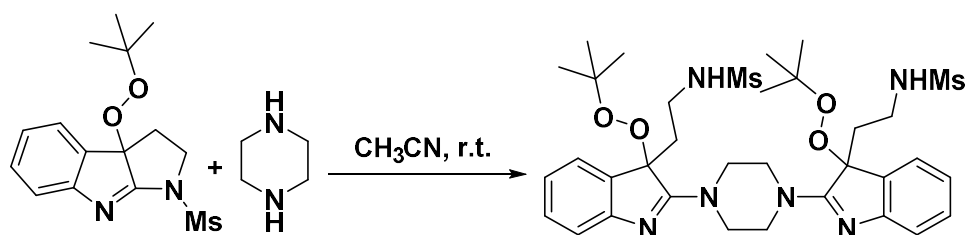***N, N'*-((piperazine-1,4-diylbis(3-(tert-butylperoxy)-3H-indole-2,3-diyl)) bis(ethane-2,1-diyl)) dimethanesulfonamide**

To a solution of 3a-(tert-butylperoxy)-1-(methylsulfonyl)-1,2,3,3a-tetrahydropyrrolo[2,3-b] indole (130 mg, 0.4 mmol) and piperazine (17 mg, 0.2 mmol) in CH<sub>3</sub>CN (4 mL) to form a homogeneous solution. The mixture was stirred at r.t. overnight. TLC (petroleum ether:EtOAc = 4:1) indicated that the reaction was complete. Then concentrated to dryness under vacuum. The residue was purified by silica gel column chromatography (petroleum ether: EtOAc = 2:1) to give the desired product (103 mg, 70%) as a yellow oil.

**Physical state:** yellow oil.

**TLC:** R<sub>f</sub> = 0.23 (PE/EtOAc = 1:1).

**<sup>1</sup>H NMR (500 MHz, CDCl<sub>3</sub>)** δ 7.25 – 7.20 (m, 2H), 7.14 (d, *J* = 7.2 Hz, 2H), 7.09 – 7.04 (m, 2H), 6.93 (t, *J* = 6.8 Hz, 2H), 4.97 (s, 1H), 4.43 – 3.64 (m, 8H), 2.77 (s, 4H), 2.76 (s, 6H), 2.29 (t, *J* = 7.0 Hz, 4H), 1.11 (s, 18H).

**<sup>13</sup>C NMR (126 MHz CDCl<sub>3</sub>)** δ 170.57, 153.71, 133.18, 130.27, 122.37, 121.81, 116.44, 91.27, 80.85, 45.57, 39.97, 38.57, 35.93, 26.52.

**HRMS (ESI):** calcd for C<sub>34</sub>H<sub>51</sub>N<sub>6</sub>O<sub>8</sub>S<sub>2</sub> [M + H]<sup>+</sup> *m/z*: 735.3204, found 735.3210.

**Compound 38**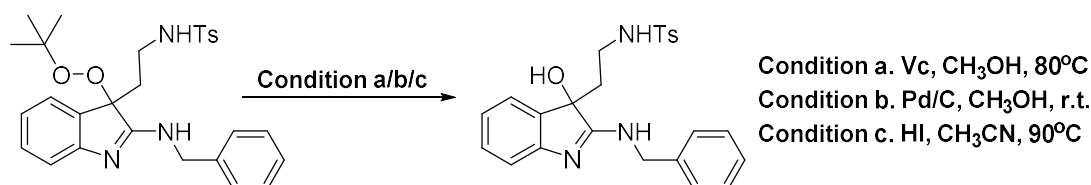***N*-(2-(2-(benzylamino)-3-hydroxy-3H-indol-3-yl)ethyl)-4-methylbenzenesulfonamide**

Condition a: To a solution of compound **1** (0.5 mmol, 254 mg) and Vc (2 mmol, 352mg) in CH<sub>3</sub>OH (15 mL). The reaction mixture was stirred for 18 h at 80 °C. The reaction mixture was basified to pH 8–9 using saturated NaHCO<sub>3</sub> and extracted with EtOAc (50 mL). Then, the combined organic layers were washed with saturated brine (50 mL), dried over anhydrous Na<sub>2</sub>SO<sub>4</sub>, filtered, and concentrated under reduced pressure. The crude product was purified by chromatography on silica gel (petroleum ether:EtOAc = 1:1) to give the desired product as a white solid (193mg, 89%).

Condition b: To a solution of compound **1** (0.5 mmol, 254 mg) in CH<sub>3</sub>CN (3 mL) was added 10% Pd/C (76 mg). The reaction mixture was stirred at r.t. for 15 h. The mixture is filtered through diatomaceous earth. Then, the reaction mixture was basified to pH 8–9 using saturated NaHCO<sub>3</sub> and extracted with EtOAc (50 mL). Then, the combined organic layers were washed with saturated brine (50 mL), dried over anhydrous Na<sub>2</sub>SO<sub>4</sub>, filtered, and concentrated under reduced pressure. The crude product was purified by chromatography on silica gel (petroleum ether:EtOAc = 1:1) to give the desired product as a white solid (152mg, 70%).

Condition c: To a solution of compound **1** (0.25 mmol, 127 mg) in CH<sub>3</sub>CN (3 mL) was added HI (1 mmol, 9 μL). The reaction mixture was stirred for 5 h at 90 °C. The reaction mixture was basified to pH 8–9 using saturated NaHCO<sub>3</sub> and extracted with EtOAc (15 mL). Then, the combined organic layers were washed with saturated brine (15 mL), dried over anhydrous Na<sub>2</sub>SO<sub>4</sub>, filtered, and concentrated under reduced pressure. The crude product was purified by chromatography on silica gel (petroleum ether:EtOAc = 1:1) to give the desired product as a white solid (90mg, 83%).

**Physical state:** white solid.

**Melting point:** 113 - 115 °C.

**TLC:** R<sub>f</sub> = 0.35 (petroleum ether/EtOAc = 1:1).

**<sup>1</sup>H NMR (500 MHz, DMSO-*d*<sub>6</sub>)** δ 8.31 (s, 1H), 7.99 (s, 1H), 7.54 (d, *J* = 8.2 Hz, 2H), 7.48 (t, *J* = 5.6 Hz, 1H), 7.34 (d, *J* = 8.1 Hz, 2H), 7.30 (s, 2H), 7.29 (s, 1H), 7.25 – 7.21 (m, 1H), 7.10 (t, *J* = 7.6 Hz, 1H), 7.03 (d, *J* = 7.7 Hz, 1H), 6.86 (d, *J* = 7.6 Hz, 1H), 6.80 (t, *J* = 7.3 Hz, 1H), 5.96 (s, 1H), 4.48 (s, 2H), 2.63 – 2.52 (m, 1H), 2.36 (s, 3H), 2.33 (d, *J* = 7.8 Hz, 1H), 2.12 – 2.03 (m, 1H), 1.92 – 1.85 (m, 1H).

**<sup>13</sup>C NMR (126 MHz, DMSO-*d*<sub>6</sub>)** δ 176.13, 156.31, 143.09, 140.07, 137.81, 130.13, 129.57, 128.69, 127.55, 127.14, 126.96, 122.48, 120.81, 115.55, 80.69, 79.71, 45.39, 38.72, 38.34, 21.99.

**HRMS (ESI):** calcd for C<sub>24</sub>H<sub>26</sub>N<sub>3</sub>O<sub>3</sub>S [M + H]<sup>+</sup> *m/z*: 436.1689, found 436.1689.

### Gram-Scale Synthesis of 27

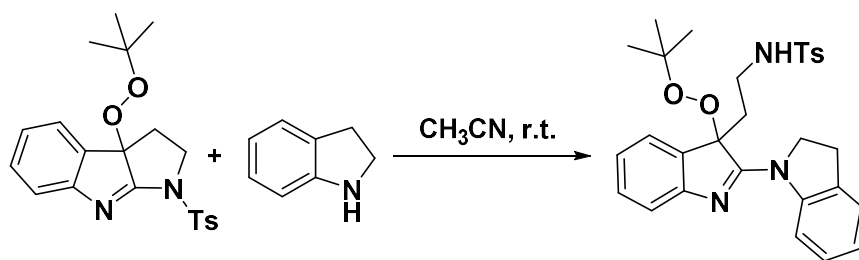

#### ***N*-(2-(3-(tert-butylperoxy)-2-(indolin-1-yl)-3H-indol-3-yl)ethyl)-4-methylbenzenesulfonamide**

To a solution of 3-(tert-butylperoxy)-1-tosyl-1,2,3,3a-tetrahydropyrrolo[2,3-b] indole (1.2 g, 3 mmol) in CH<sub>3</sub>CN (30 mL) was added indoline (370  $\mu$ L, 3.3 mmol) to form a homogeneous solution. The mixture was stirred at r.t. for 1 h. TLC (petroleum ether:EtOAc = 4:1) indicated that the reaction was complete, then concentrated to dryness under vacuum. The residue was purified by silica gel column chromatography (petroleum ether:EtOAc = 2:1) to give the desired product (1.56 g, 95%) as a creamy white solid.

### The synthesis of peroxyoxindole

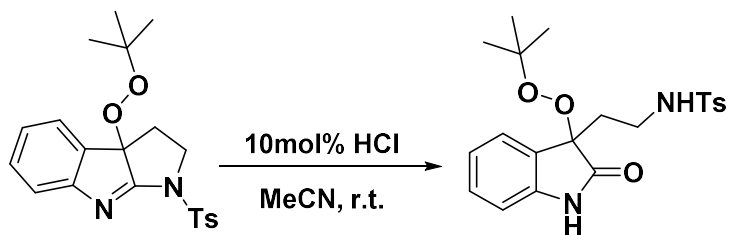

#### *N*-(2-(3-(tert-butylperoxy)-2-oxoindolin-3-yl)ethyl)-4-methylbenzenesulfonamide

To a solution of 3a-(tert-butylperoxy)-1-tosyl-1,2,3,3a-tetrahydropyrrolo[2,3-b] indole (200 mg, 0.5 mmol) in CH<sub>3</sub>CN (5 mL) was added 1N HCl (50  $\mu$ L, 0.05 mmol). The mixture was stirred at r.t. for 10 min. Then the resulting mixture was diluted with ethyl acetate (20 mL), washed with saturated NaHCO<sub>3</sub> (10 mL), water (10 mL) and saturated brine (10 mL). The organic layer was dried over anhydrous Na<sub>2</sub>SO<sub>4</sub>, filtered, and then concentrated to dryness under vacuum. The residue was purified by silica gel column chromatography (petroleum ether:EtOAc = 2:1) to give the desired product as a yellow solid (85 mg, 41%).

**Physical state:** yellow solid.

**Melting point:** 151 - 152 °C.

**TLC:** R<sub>f</sub> = 0.37 (petroleum ether/EtOAc = 1:1).

**<sup>1</sup>H NMR (500 MHz, CDCl<sub>3</sub>)**  $\delta$  8.95 (s, 1H), 7.70 (d, *J* = 8.0 Hz, 2H), 7.24 (d, *J* = 5.9 Hz, 2H), 7.23 (d, *J* = 5.6 Hz, 1H), 7.19 (d, *J* = 7.4 Hz, 1H), 7.04 – 6.99 (m, 1H), 6.87 (d, *J* = 7.7 Hz, 1H), 5.96 – 5.88 (m, 1H), 3.11 – 3.01 (m, 2H), 2.38 (s, 3H), 2.28 – 2.20 (m, 1H), 2.04 – 1.97 (m, 1H), 1.06 (s, 9H).

**<sup>13</sup>C NMR (126 MHz CDCl<sub>3</sub>)**  $\delta$  177.04, 143.29, 141.29, 136.85, 130.03, 129.75, 127.91, 127.20, 124.67, 122.66, 110.76, 83.70, 80.87, 38.29, 32.50, 26.93, 21.57.

**HRMS (ESI):** calcd for C<sub>21</sub>H<sub>27</sub>N<sub>2</sub>O<sub>5</sub>S [M + H]<sup>+</sup> *m/z*: 419.1635, found 419.1630.

## 6. NMR Spectra

### <sup>1</sup>H NMR Spectrum of 1

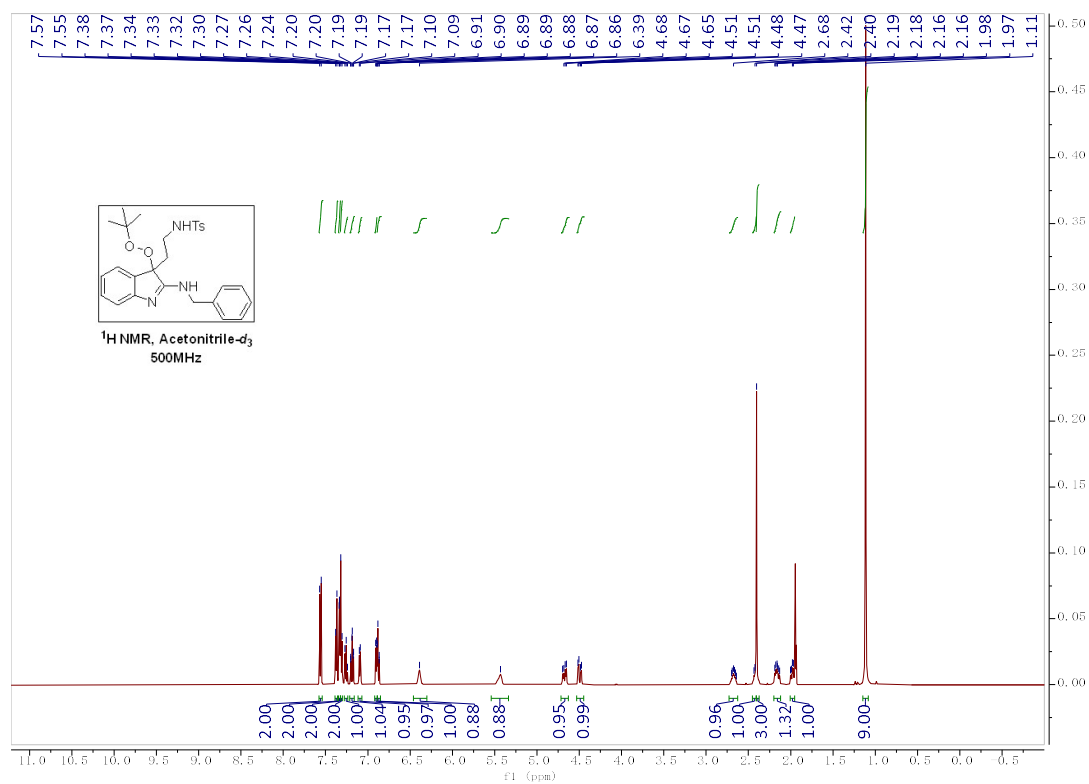

### <sup>13</sup>C NMR Spectrum of 1

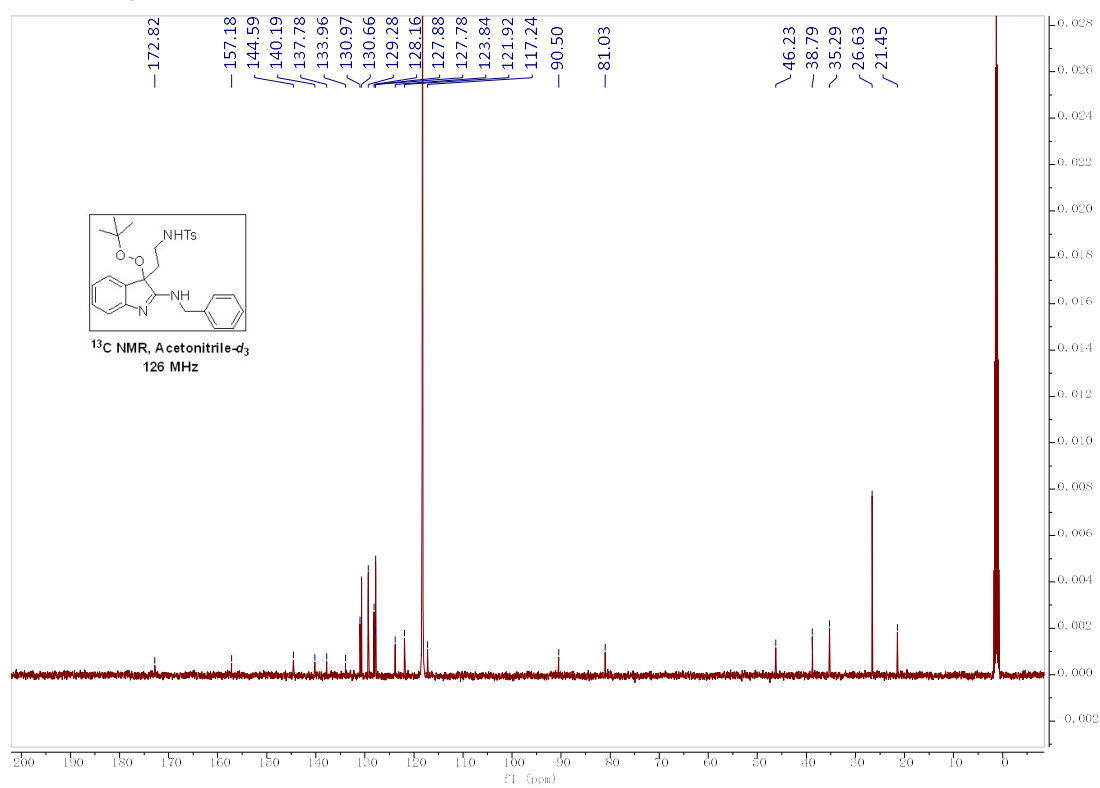

### <sup>1</sup>H NMR Spectrum of 2

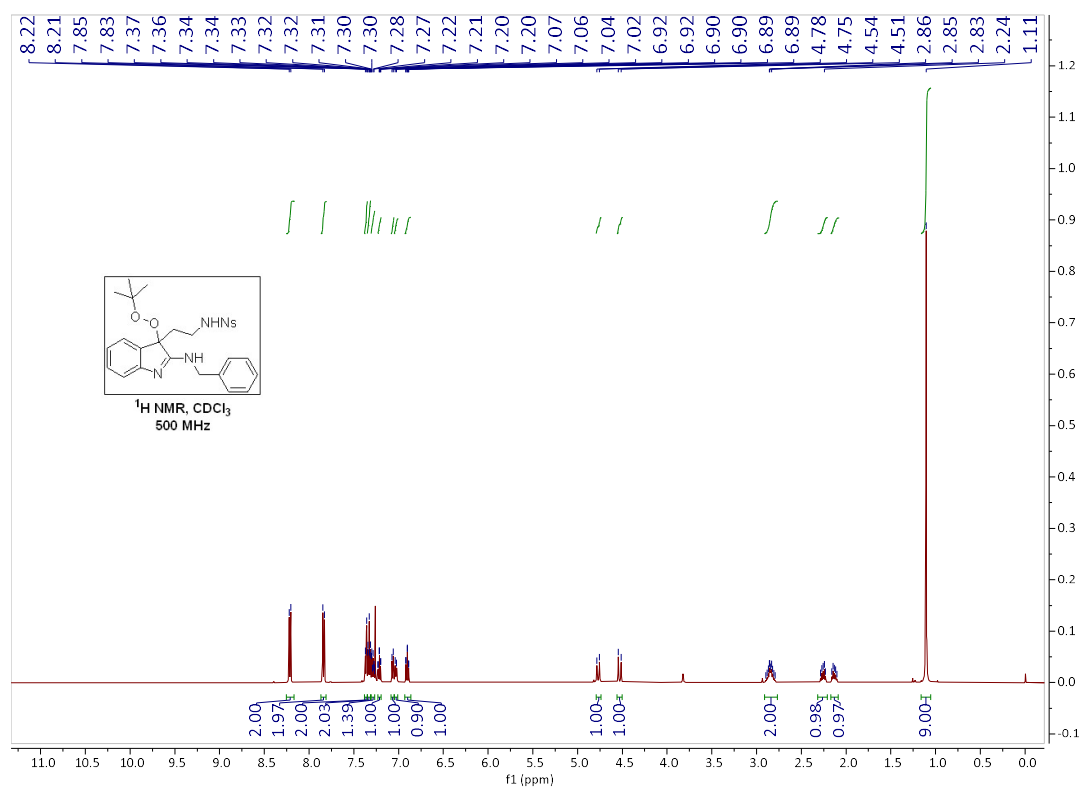

### <sup>13</sup>C NMR Spectrum of 2

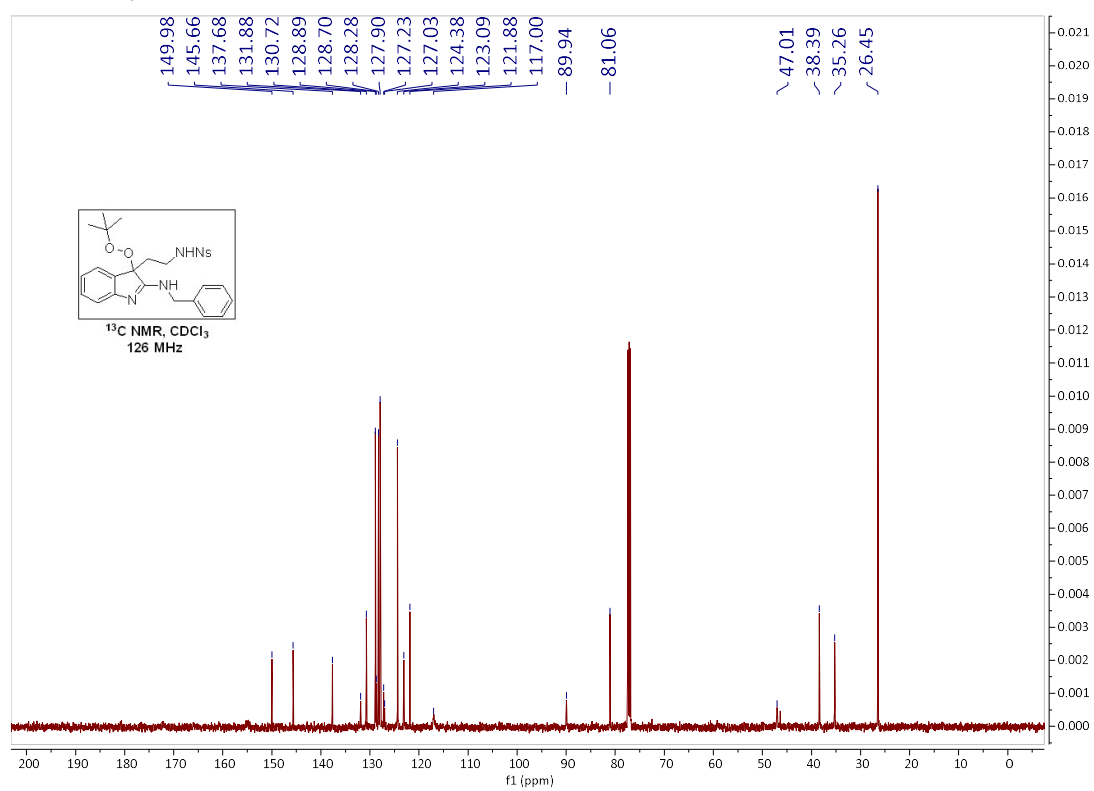

### <sup>1</sup>H NMR Spectrum of 3

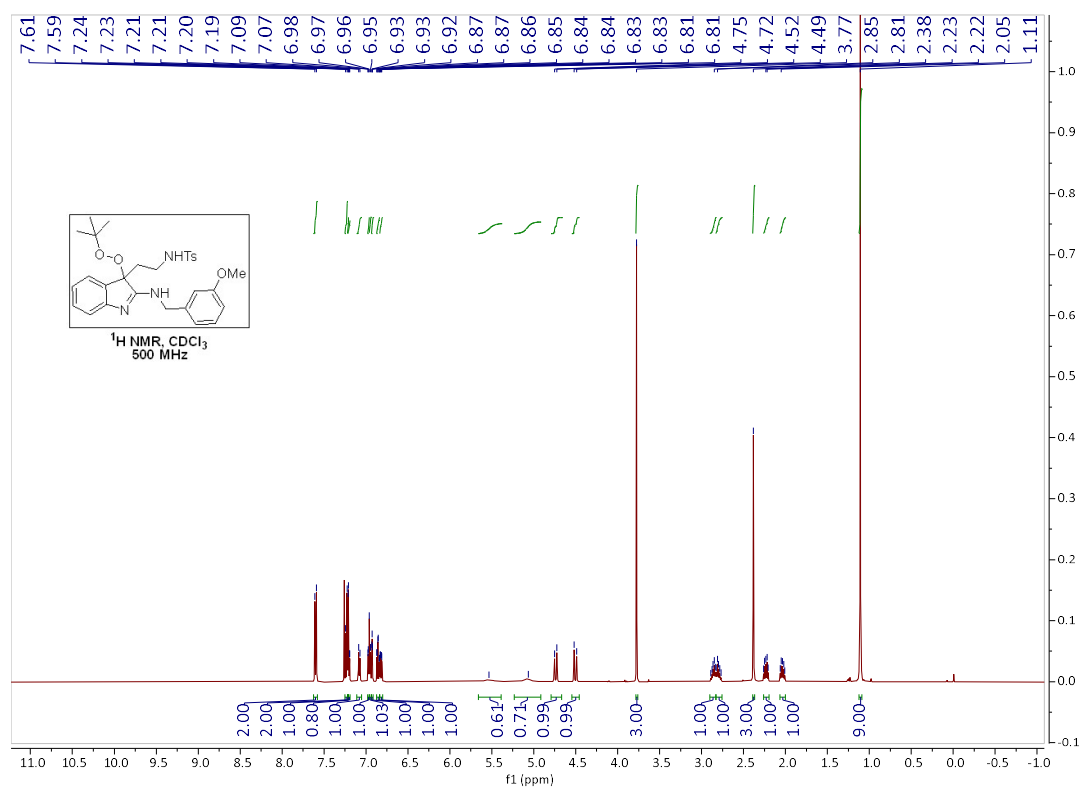

### <sup>13</sup>C NMR Spectrum of 3

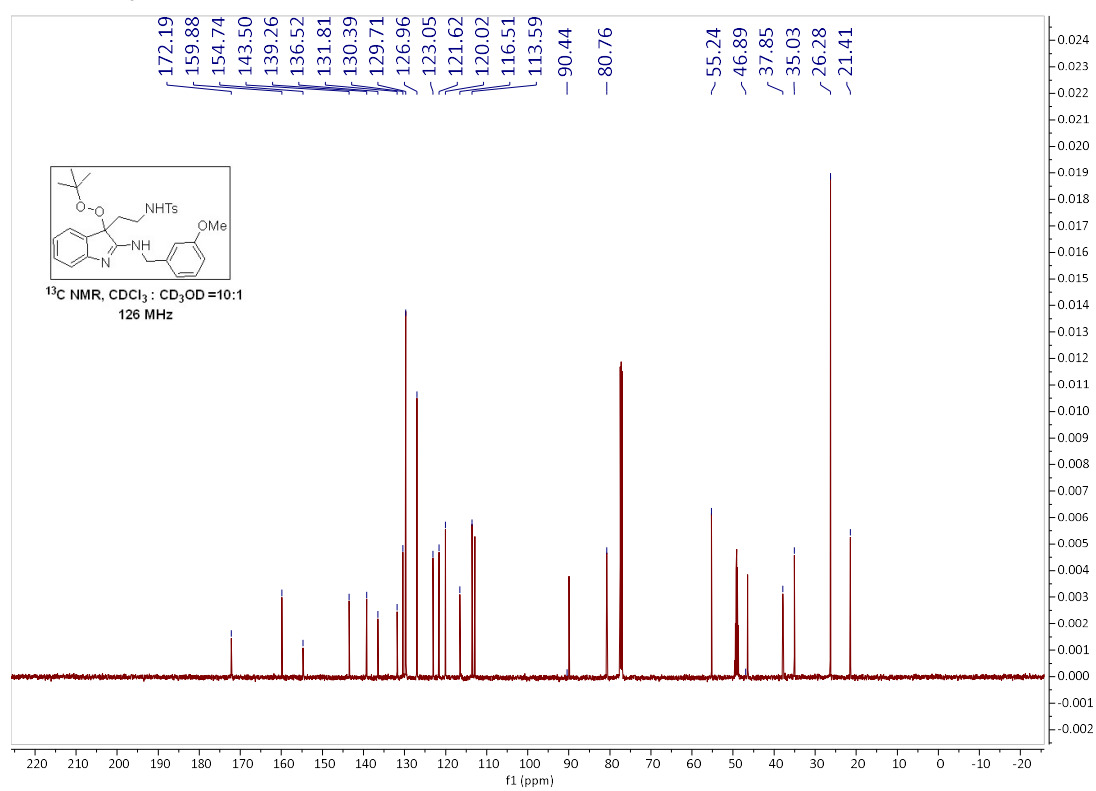



### <sup>1</sup>H NMR Spectrum of 4

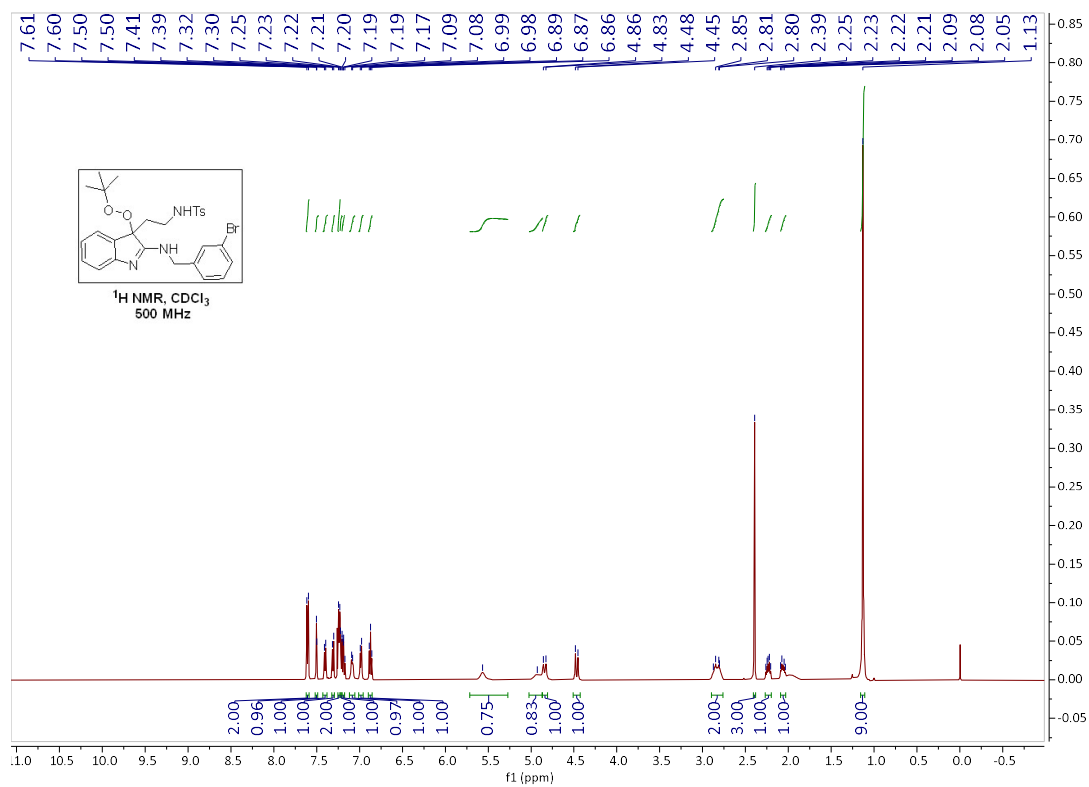

### <sup>13</sup>C NMR Spectrum of 4

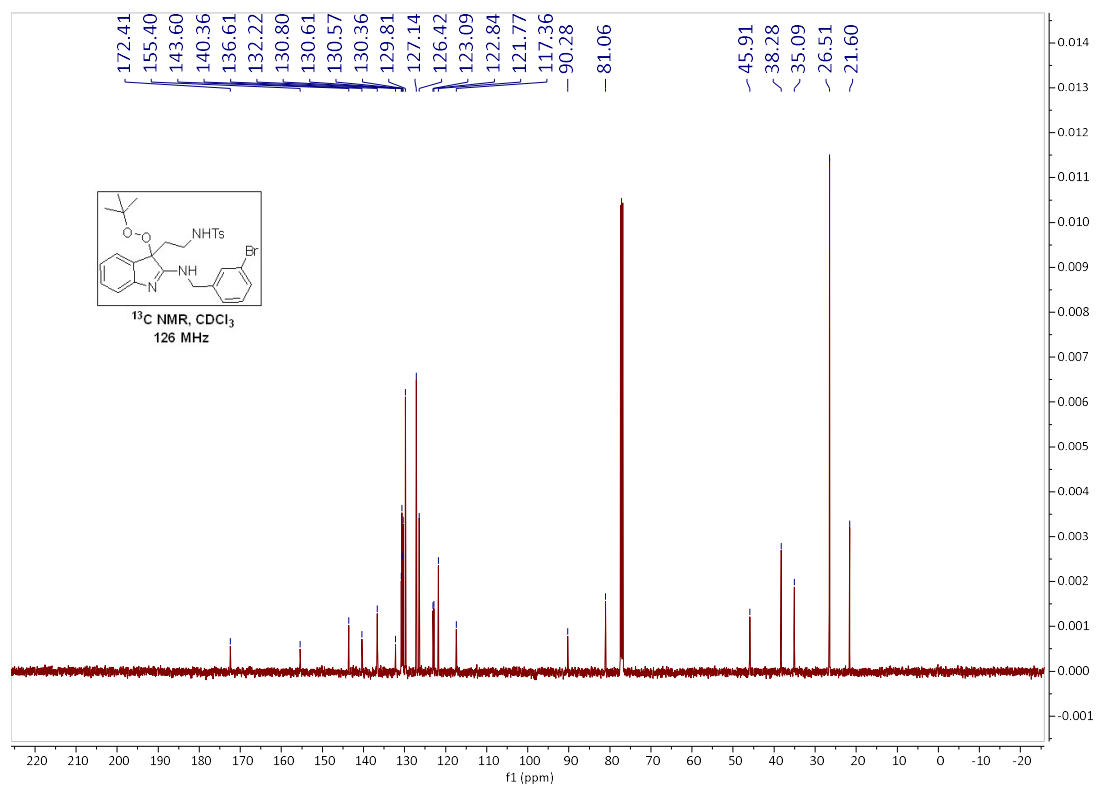

### <sup>1</sup>H NMR Spectrum of 5

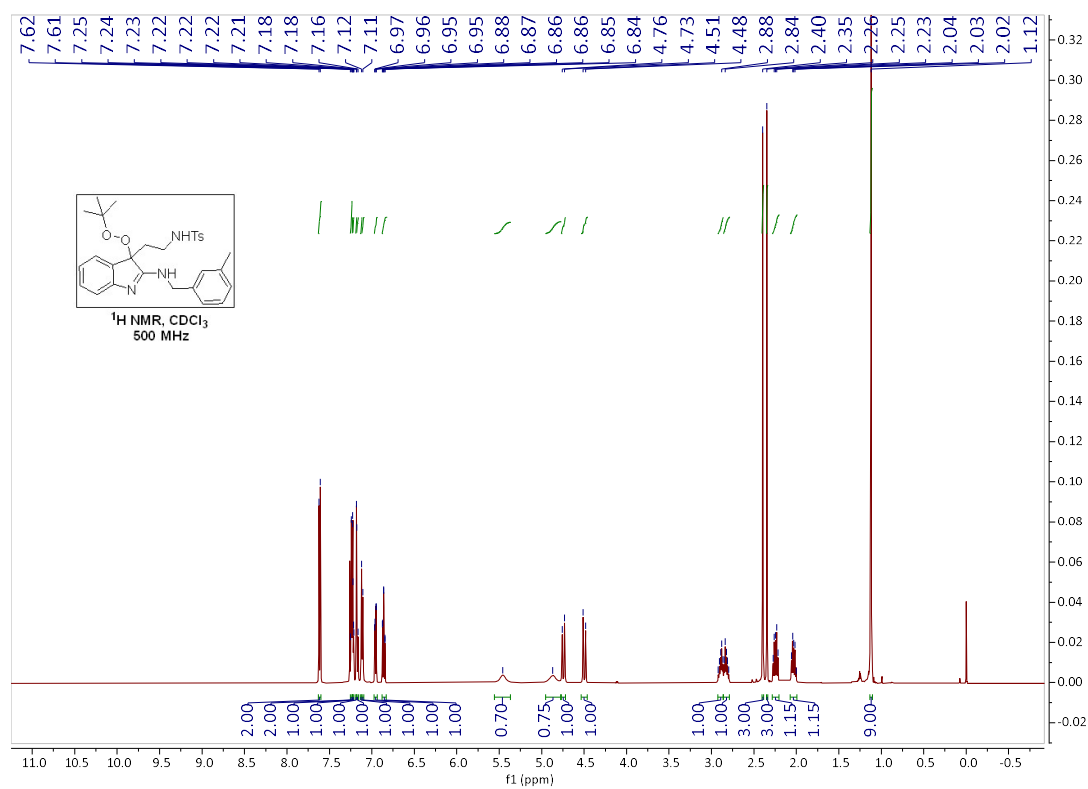

### <sup>13</sup>C NMR Spectrum of 5

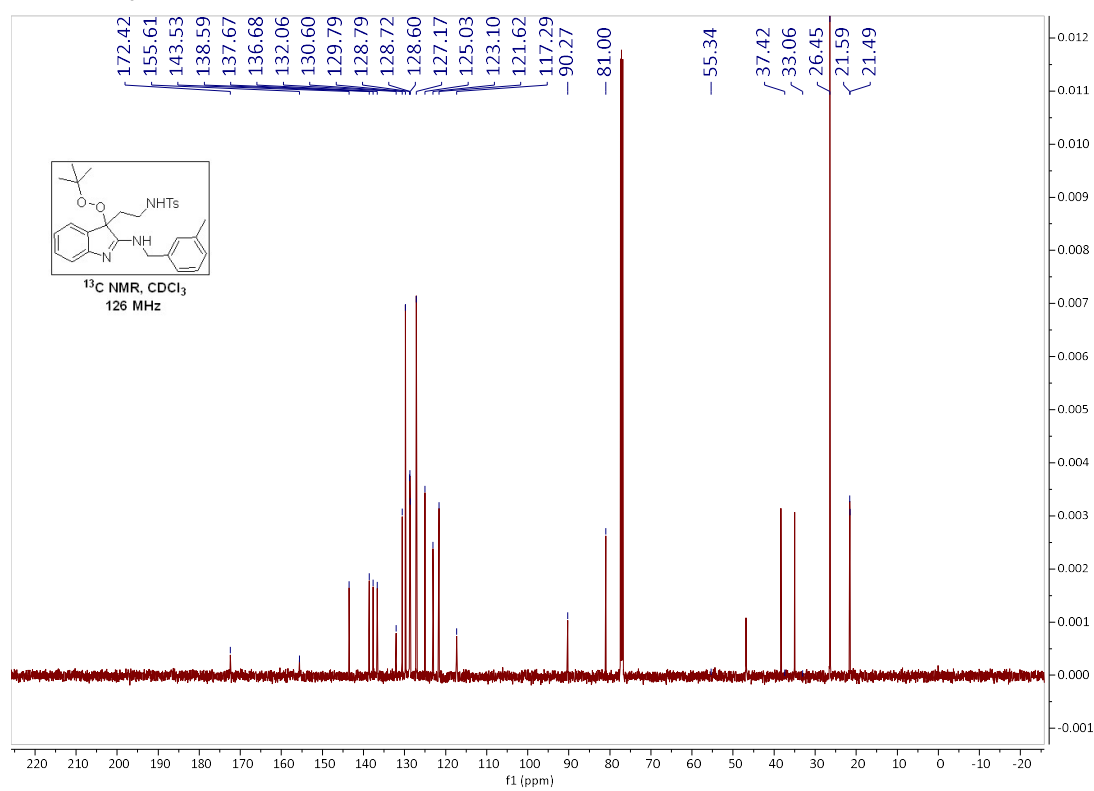

### <sup>1</sup>H NMR Spectrum of 6

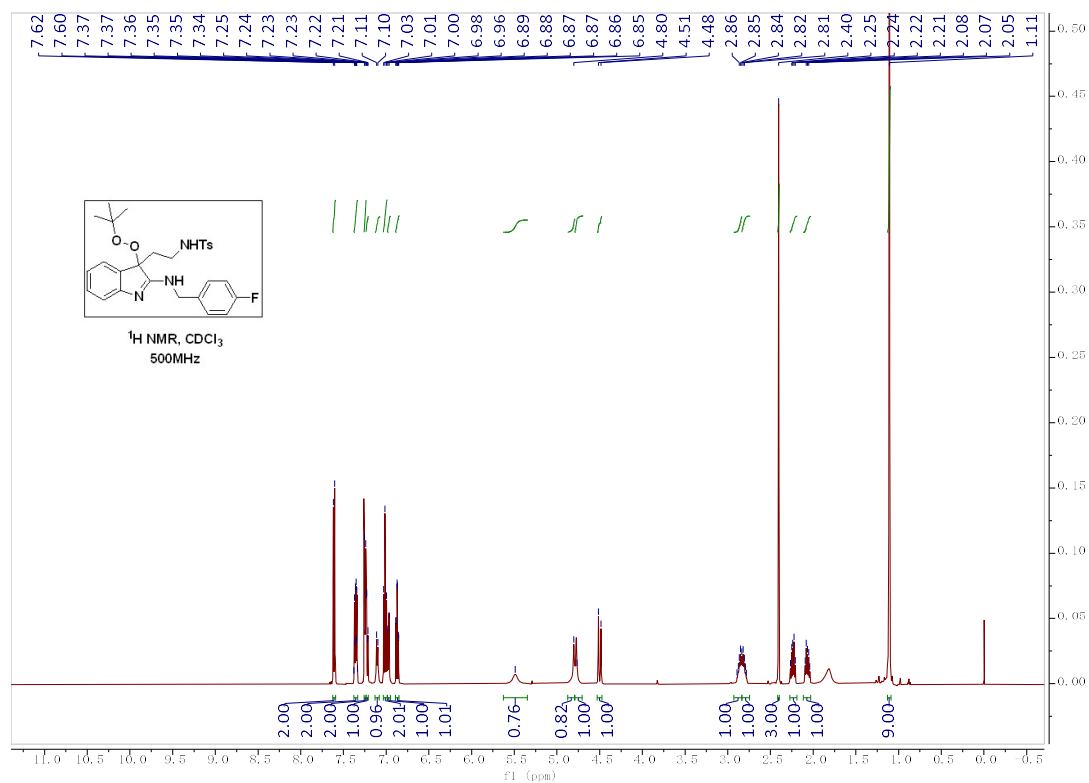

### <sup>13</sup>C NMR Spectrum of 6

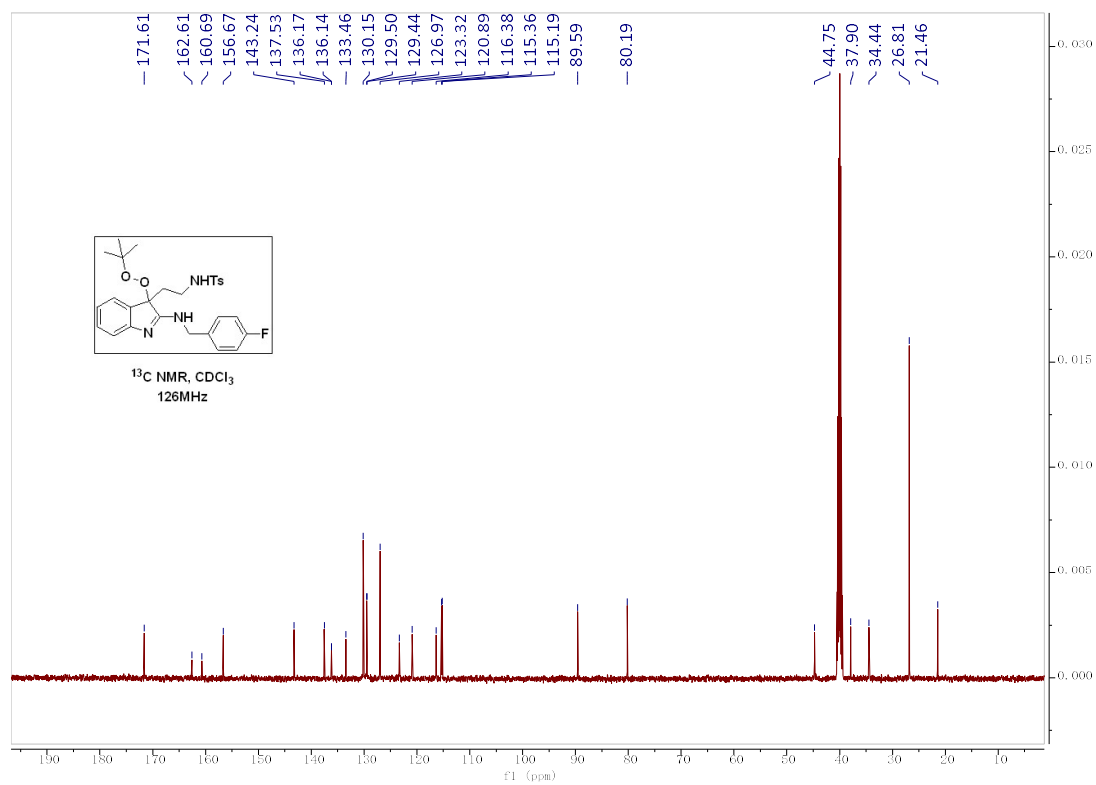

# <sup>19</sup>F NMR Spectrum of 6

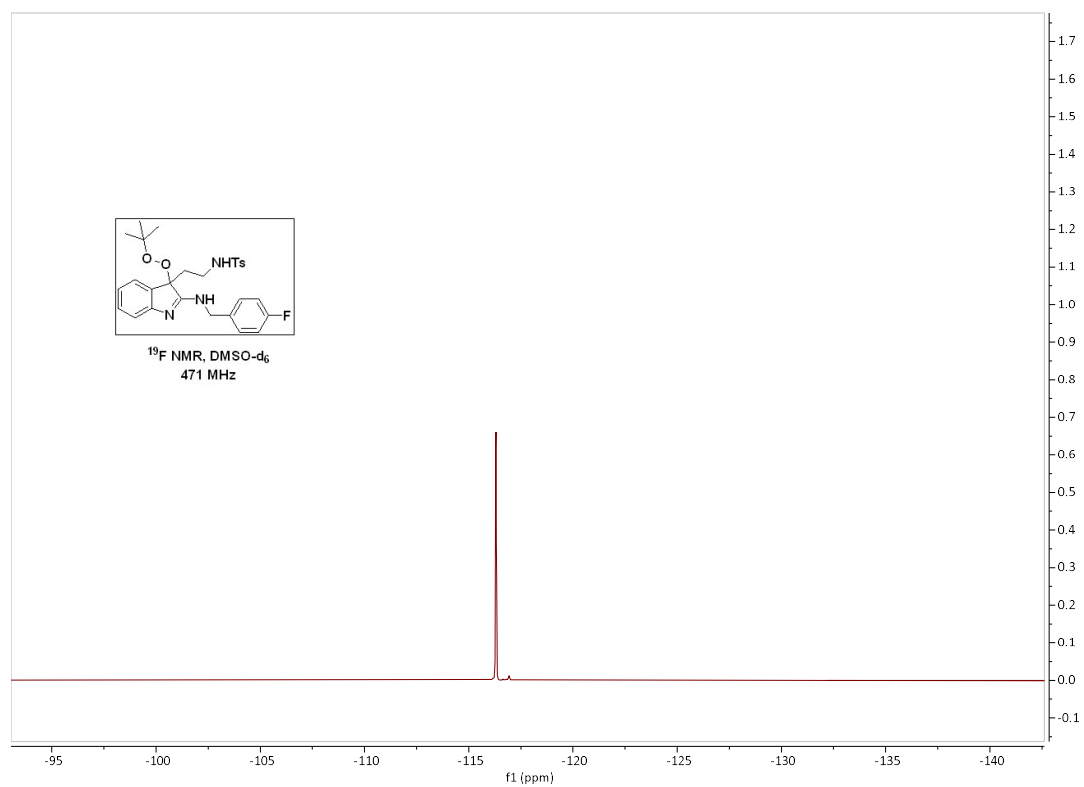

### <sup>1</sup>H NMR Spectrum of 7

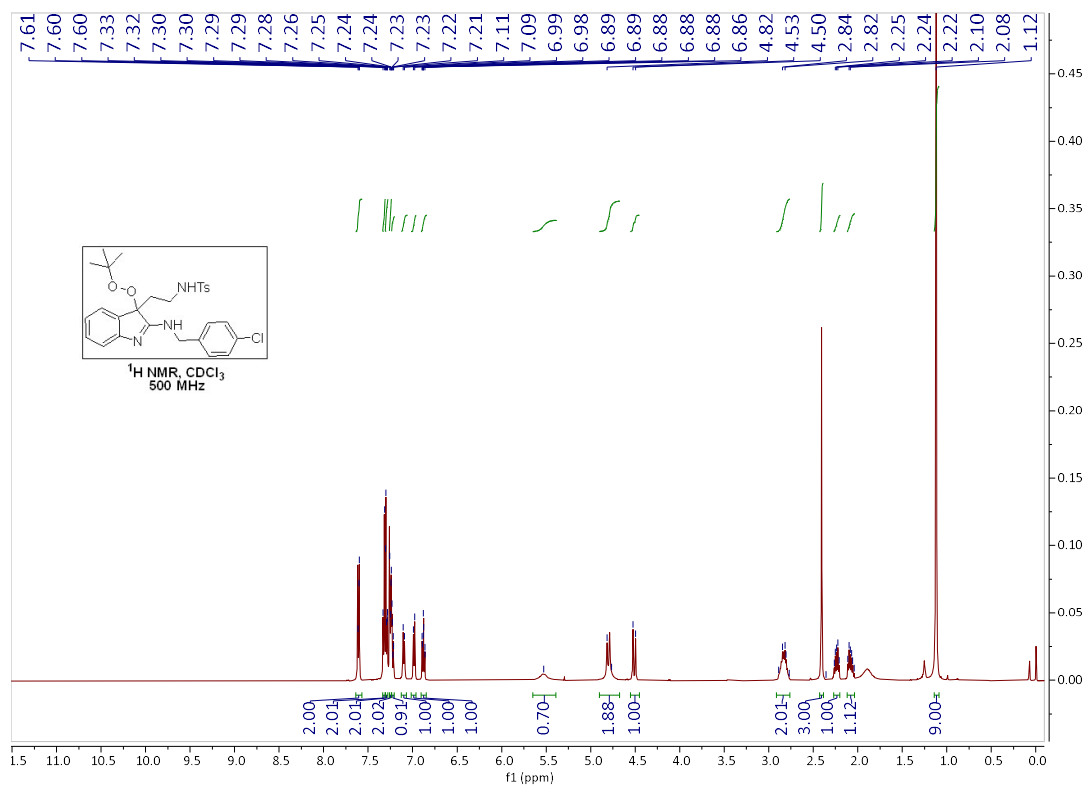

### <sup>13</sup>C NMR Spectrum of 7

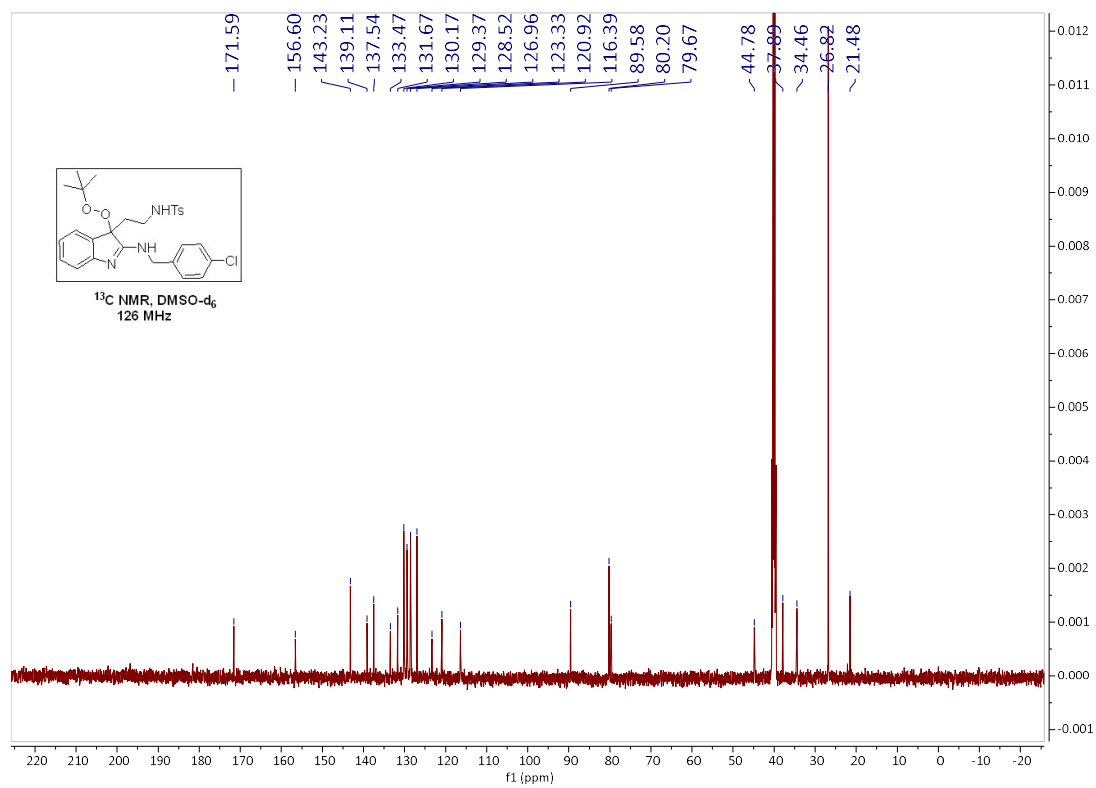

### <sup>1</sup>H NMR Spectrum of 8

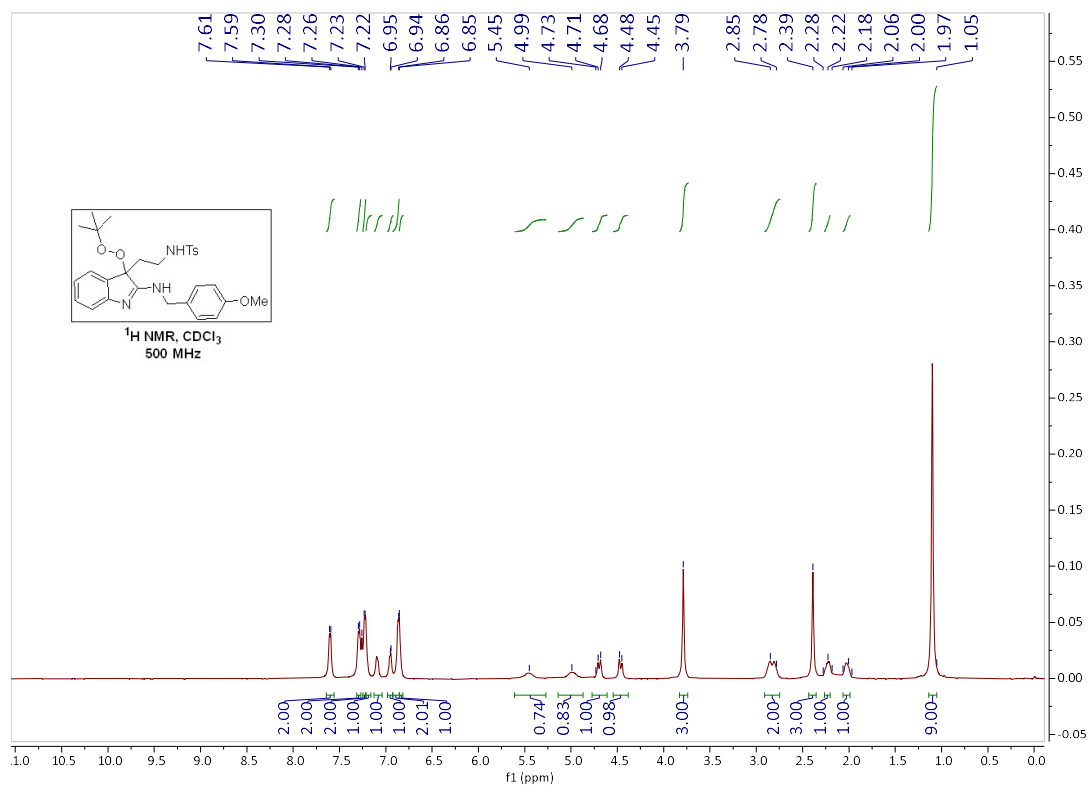

### <sup>13</sup>C NMR Spectrum of 8

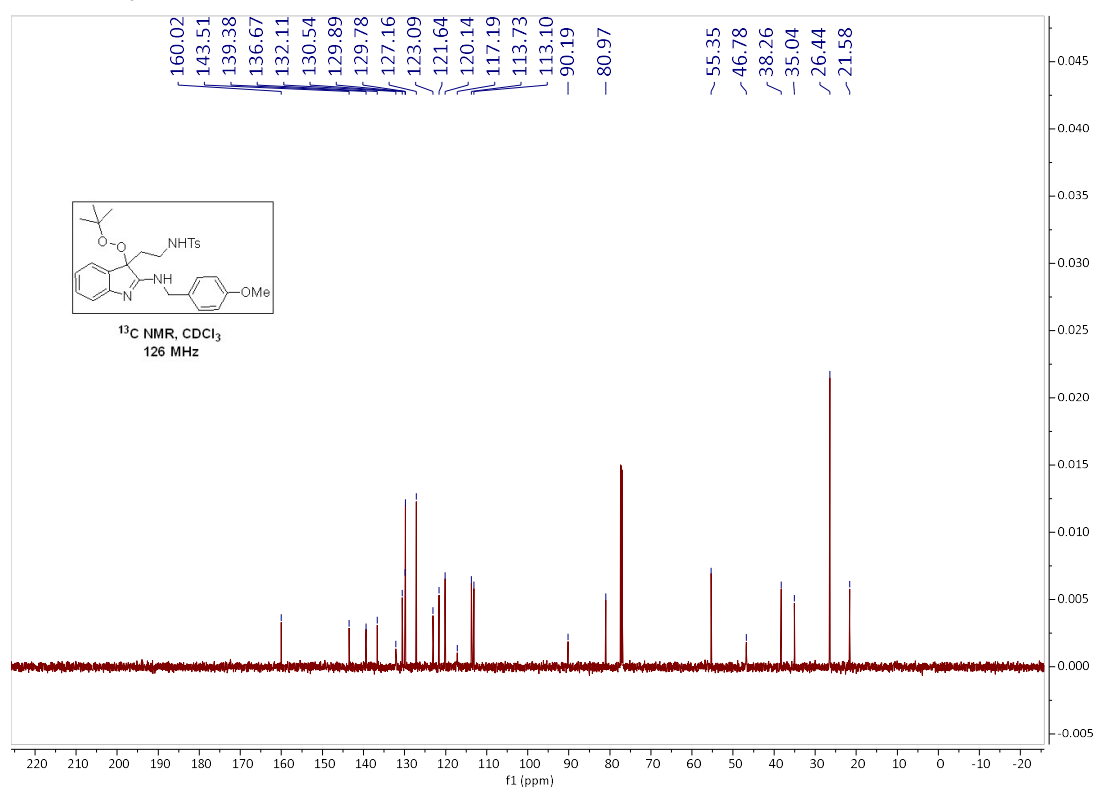

### <sup>1</sup>H NMR Spectrum of 9

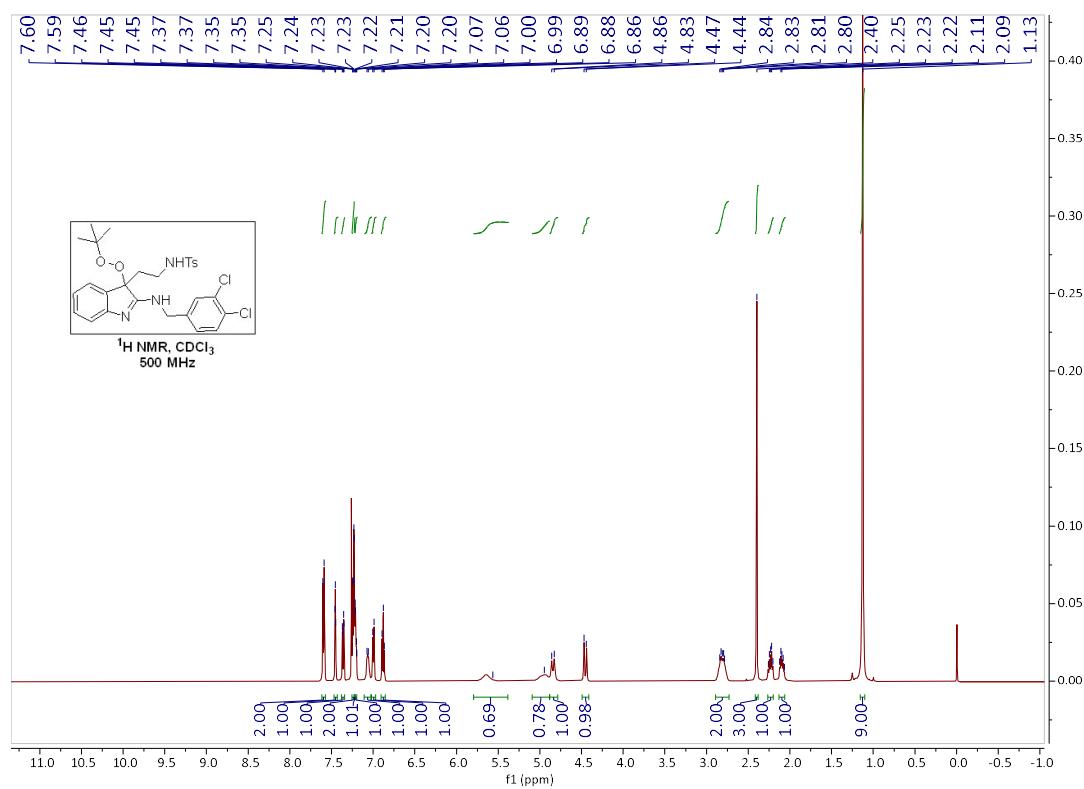

### <sup>13</sup>C NMR Spectrum of 9

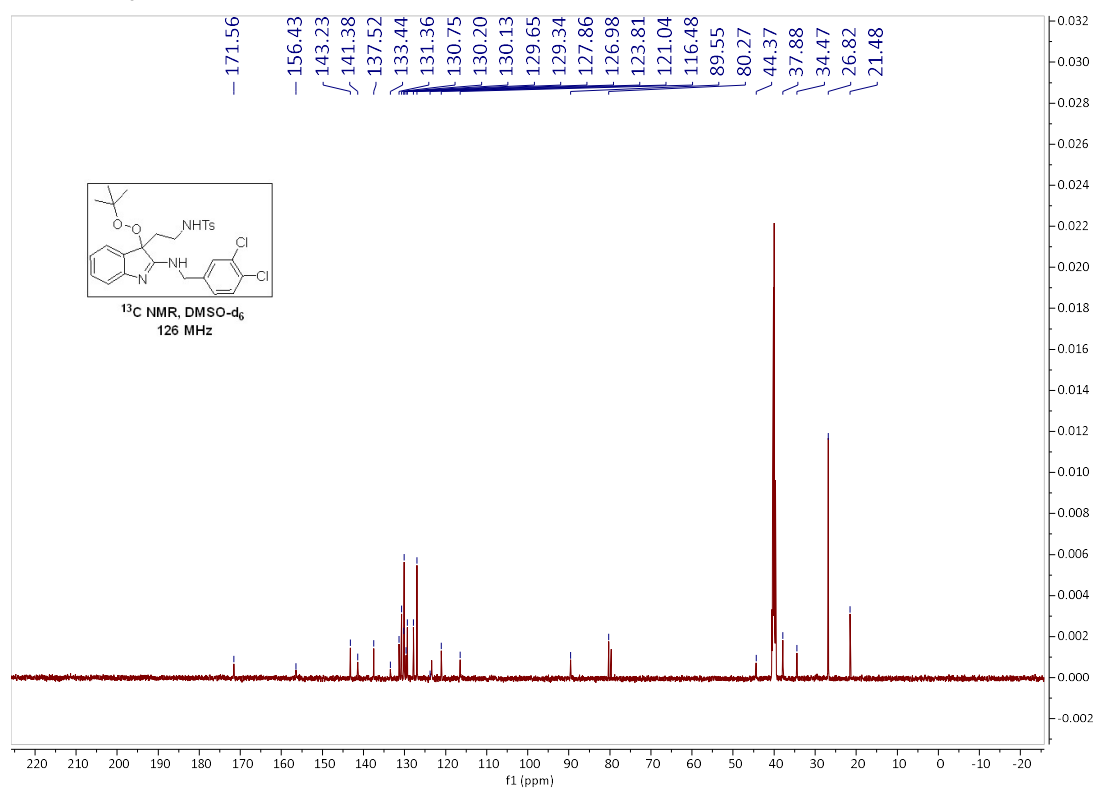

### <sup>1</sup>H NMR Spectrum of 10

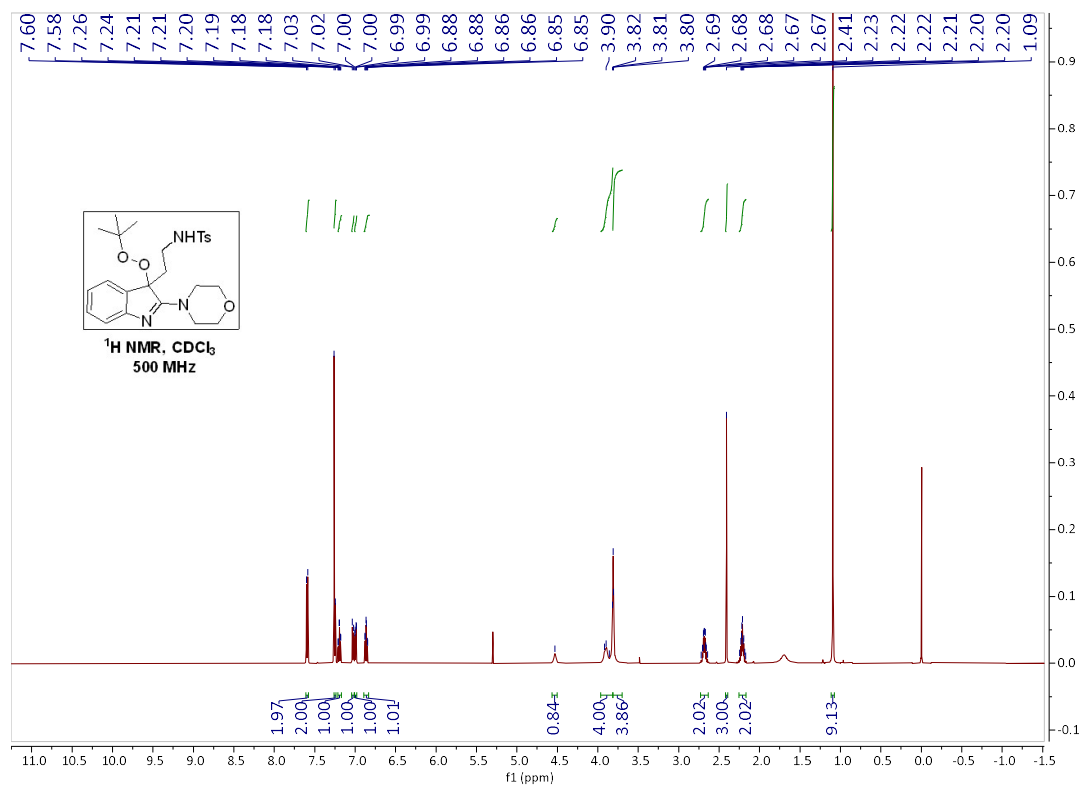

### <sup>13</sup>C NMR Spectrum of 10

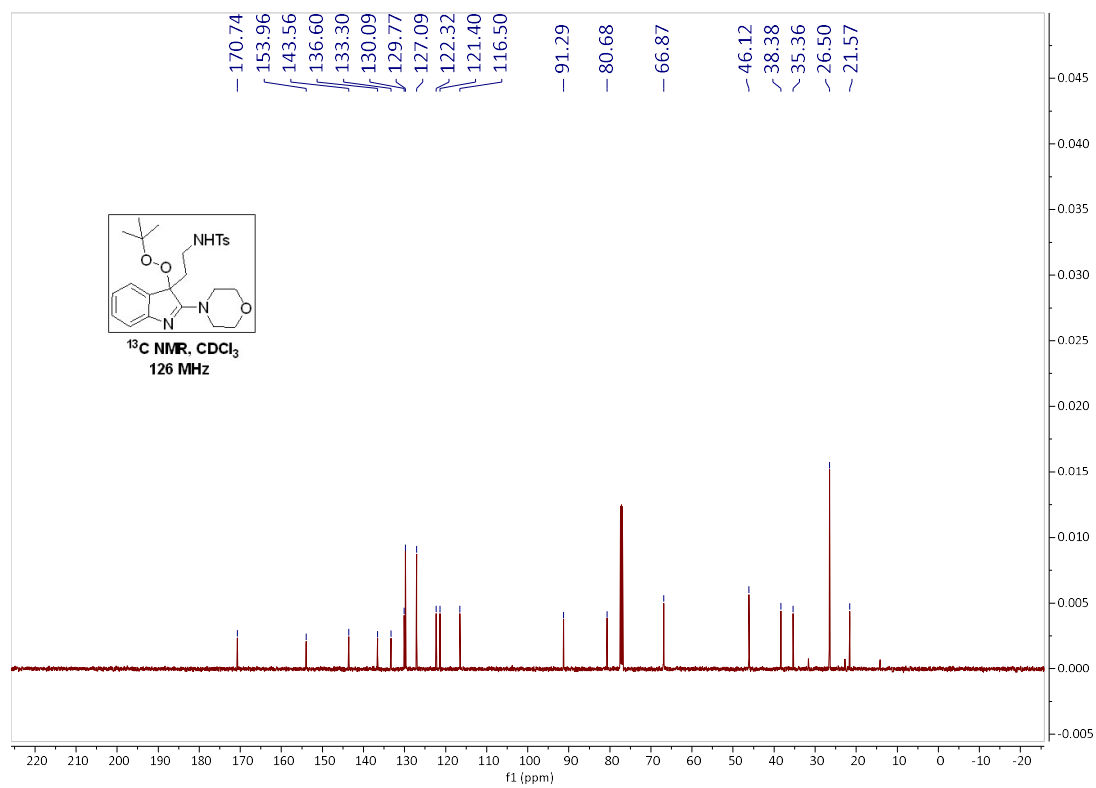



### <sup>1</sup>H NMR Spectrum of 11

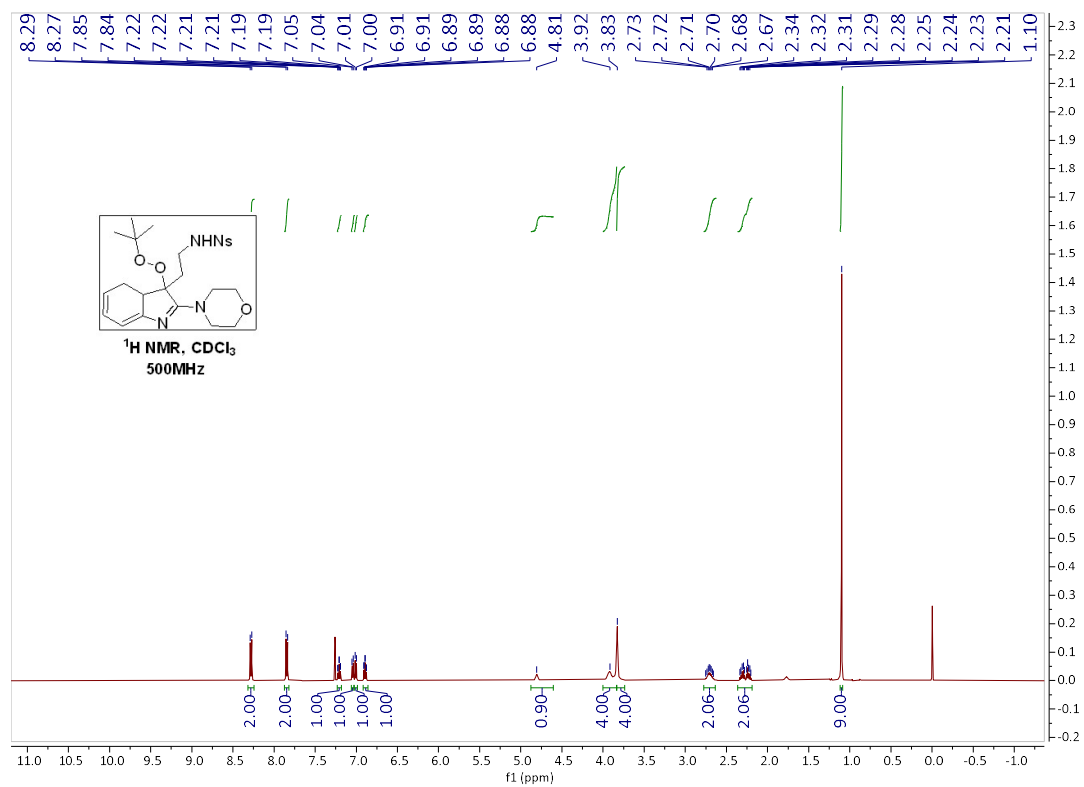

### <sup>13</sup>C NMR Spectrum of 11

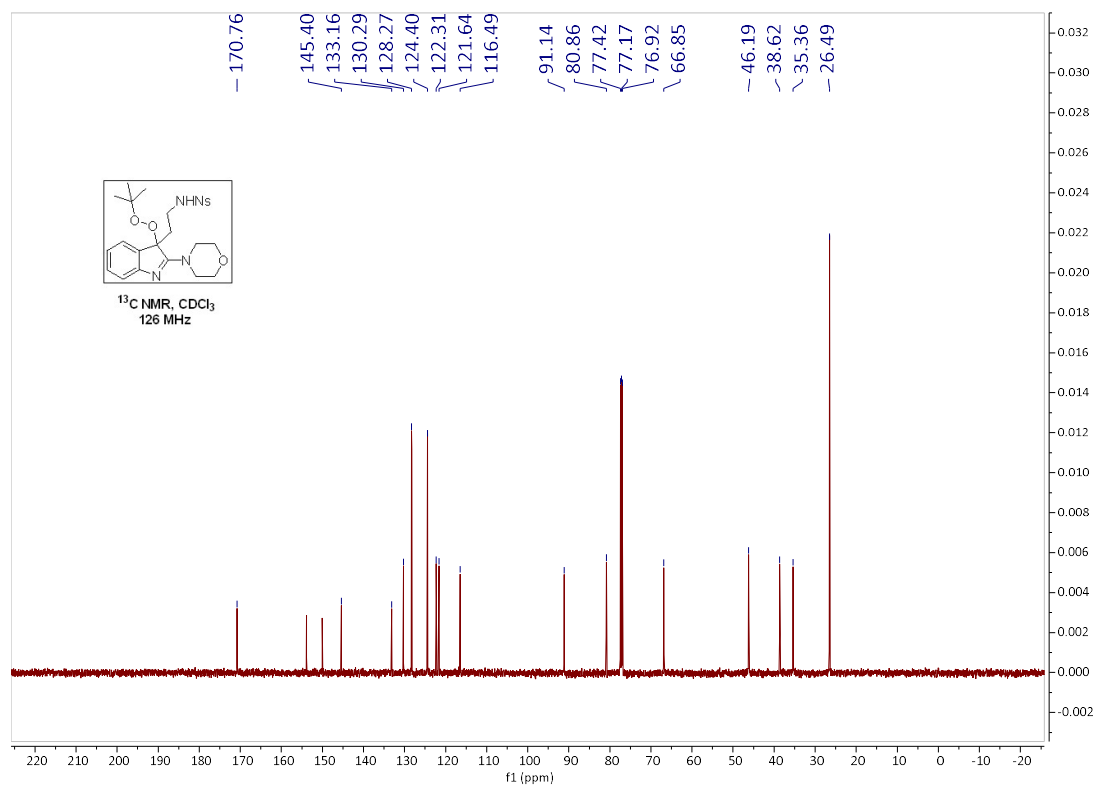

### <sup>1</sup>H NMR Spectrum of 12

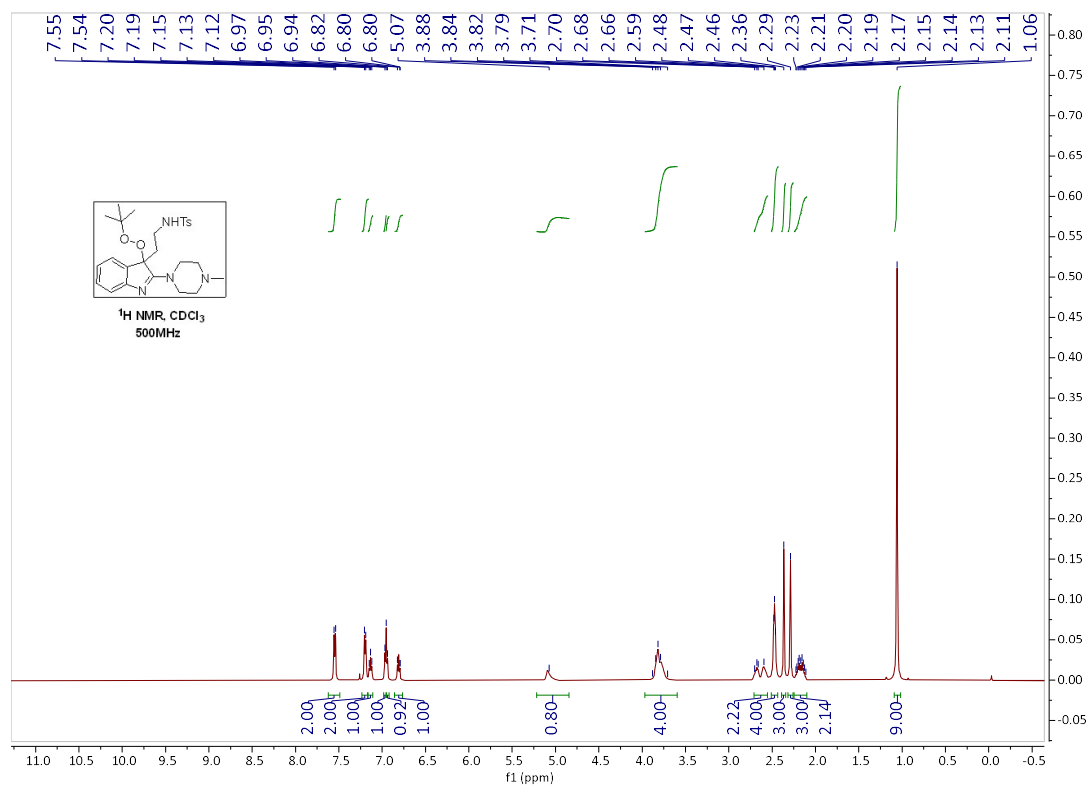

### <sup>13</sup>C NMR Spectrum of 12

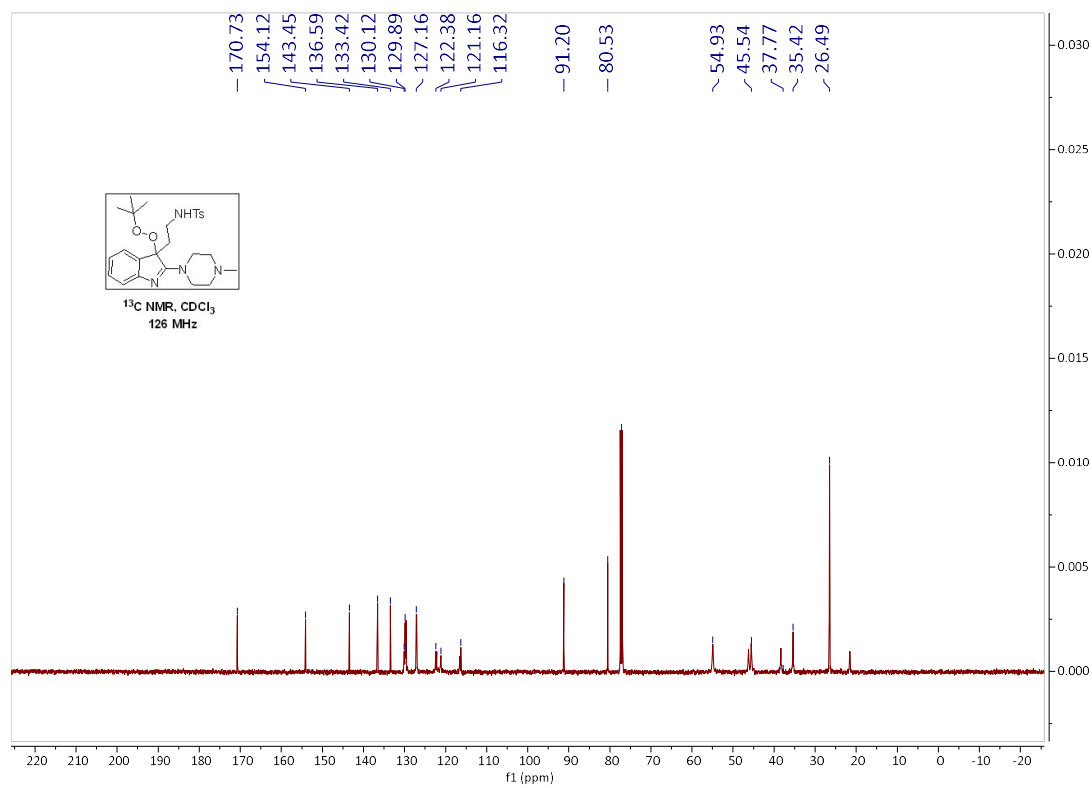

### <sup>1</sup>H NMR Spectrum of 13

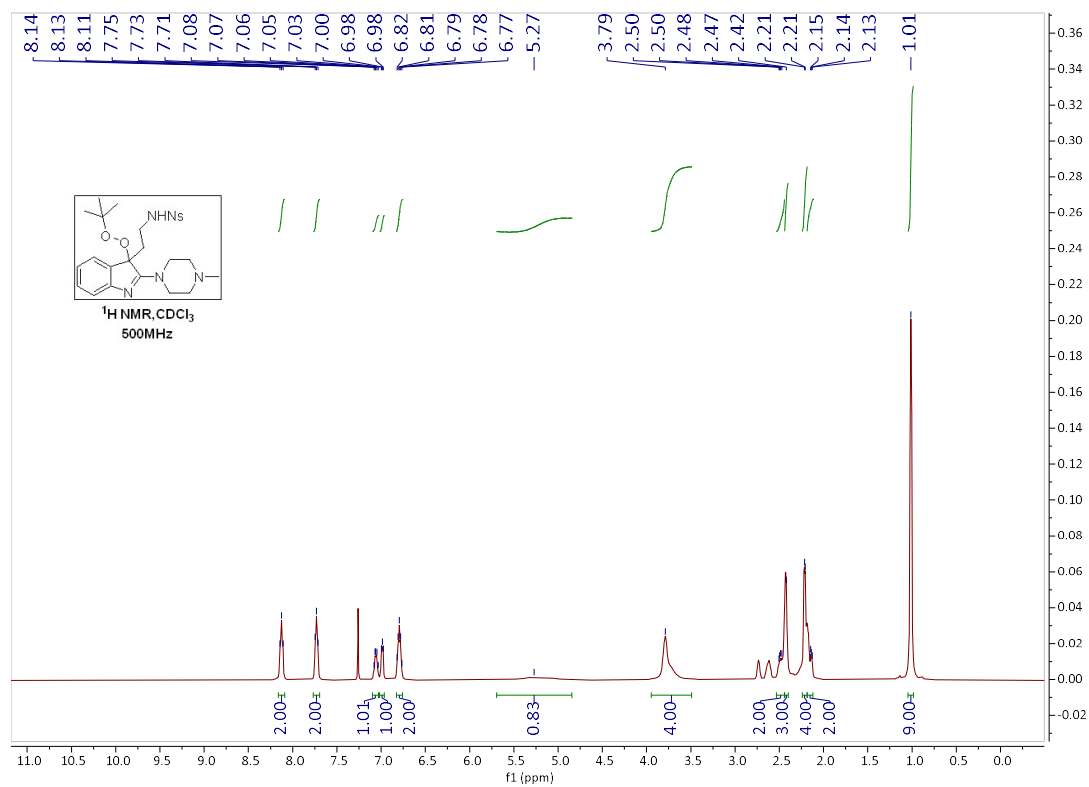

### <sup>13</sup>C NMR Spectrum of 13

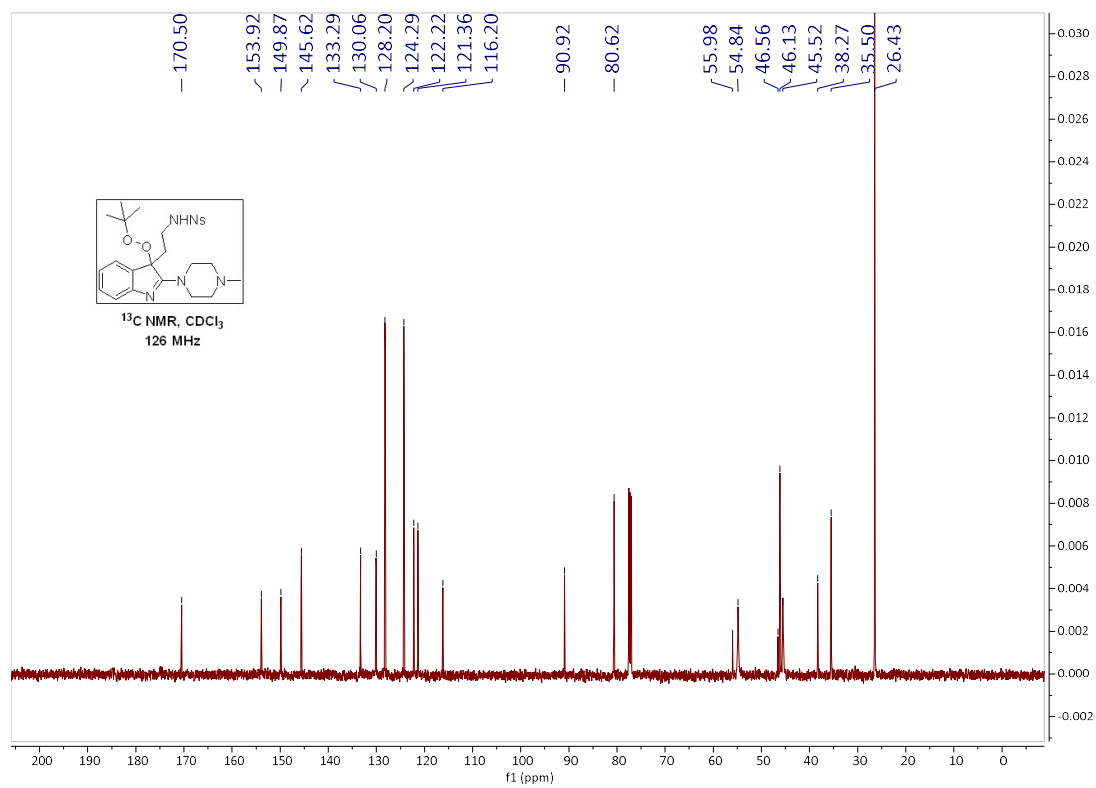

### <sup>1</sup>H NMR Spectrum of 14

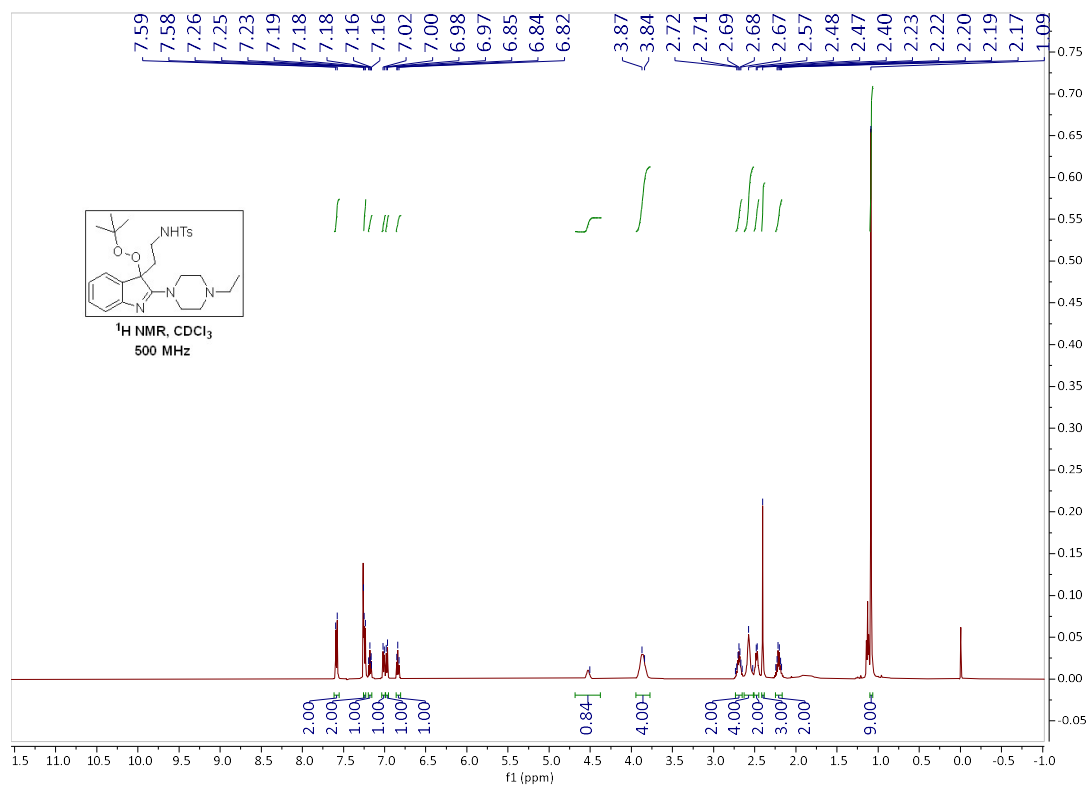

### <sup>13</sup>C NMR Spectrum of 14

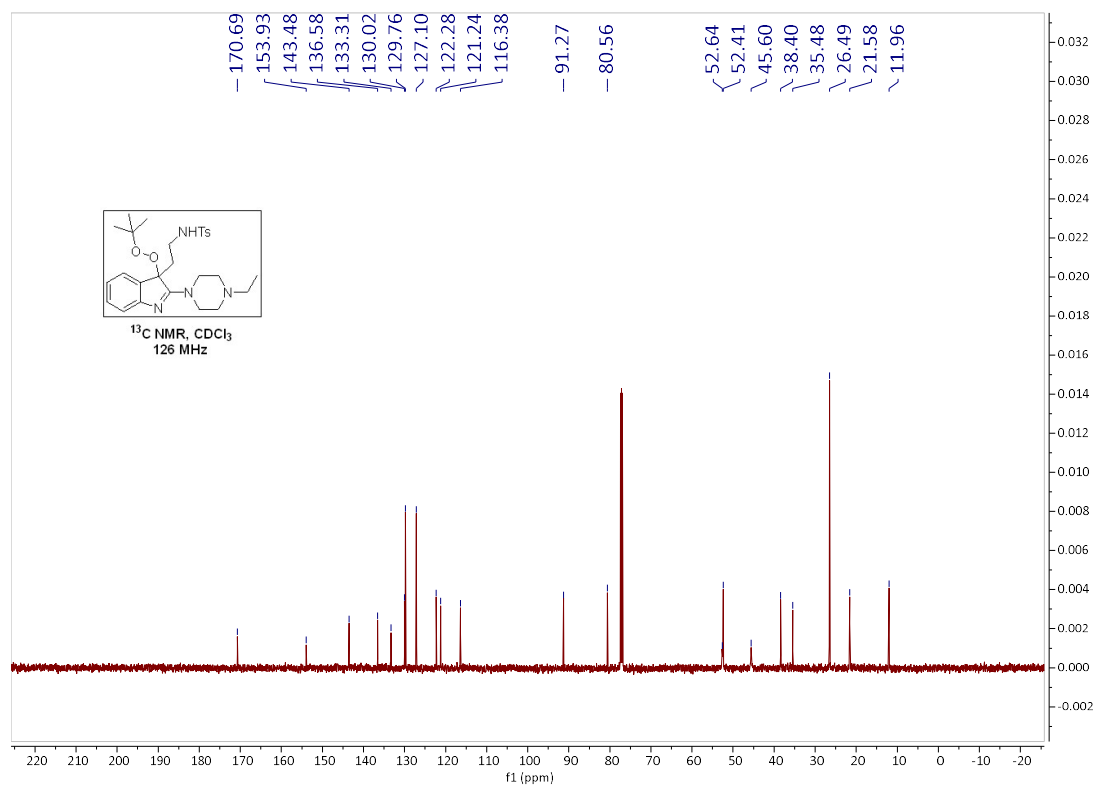

### <sup>1</sup>H NMR Spectrum of 15

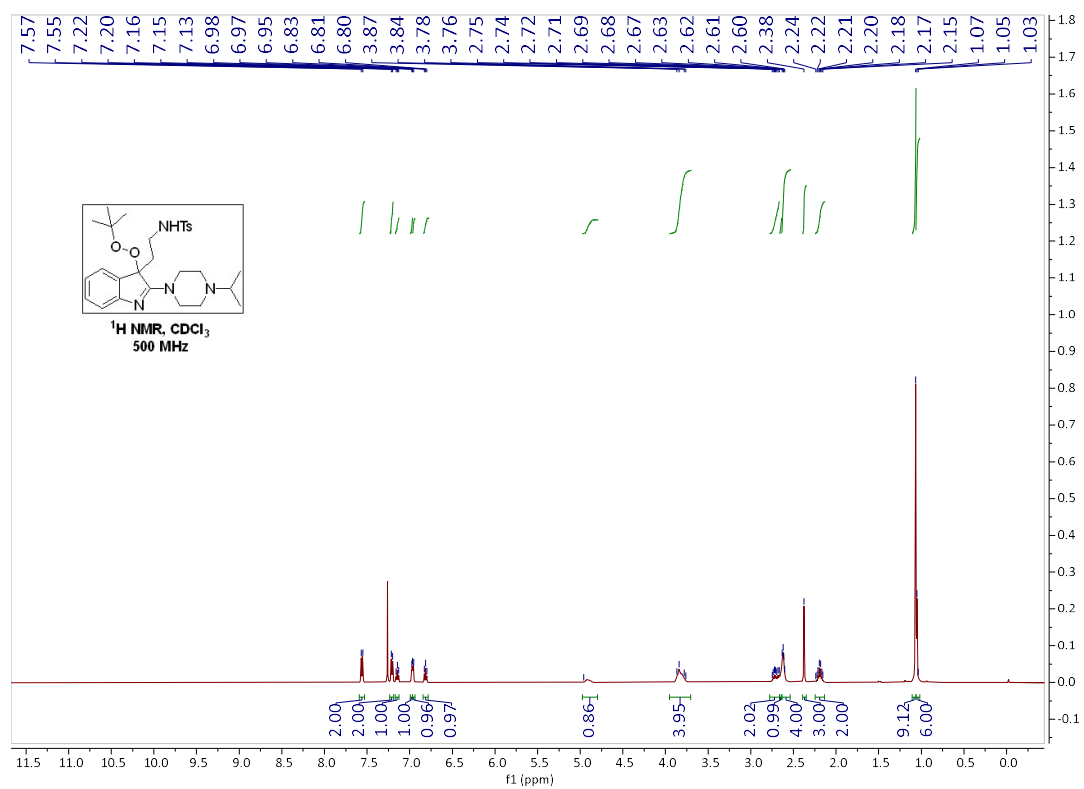

### <sup>13</sup>C NMR Spectrum of 15

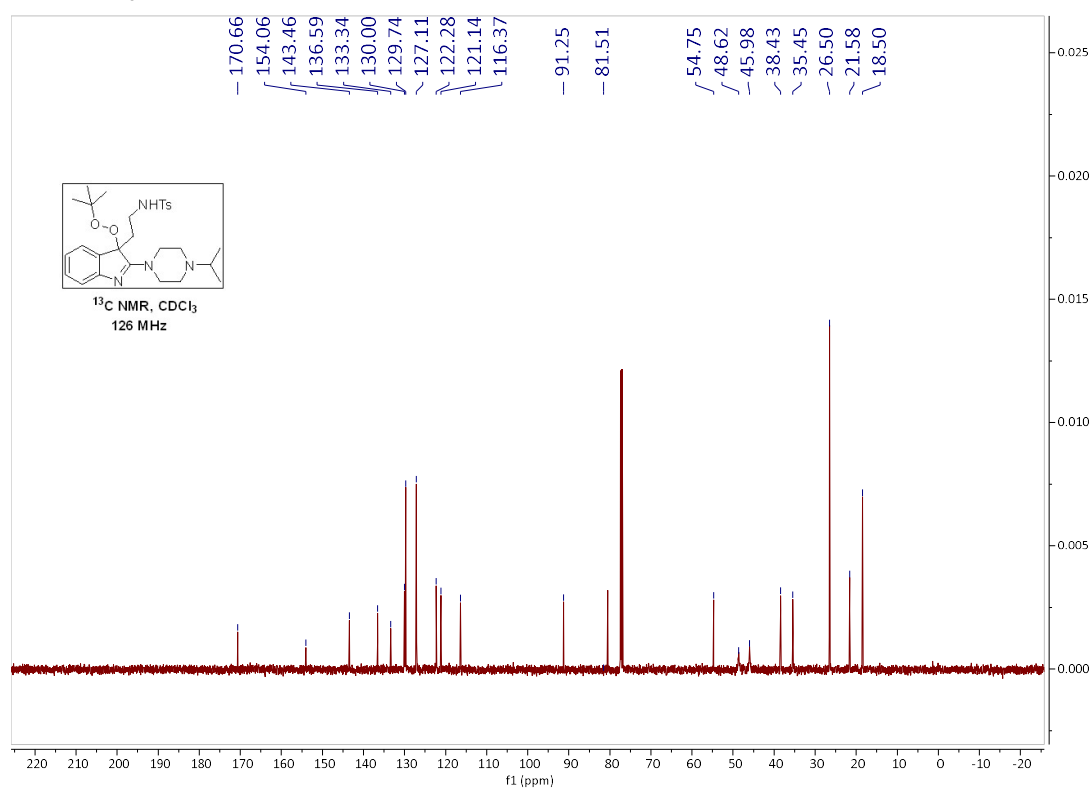

### <sup>1</sup>H NMR Spectrum of 16

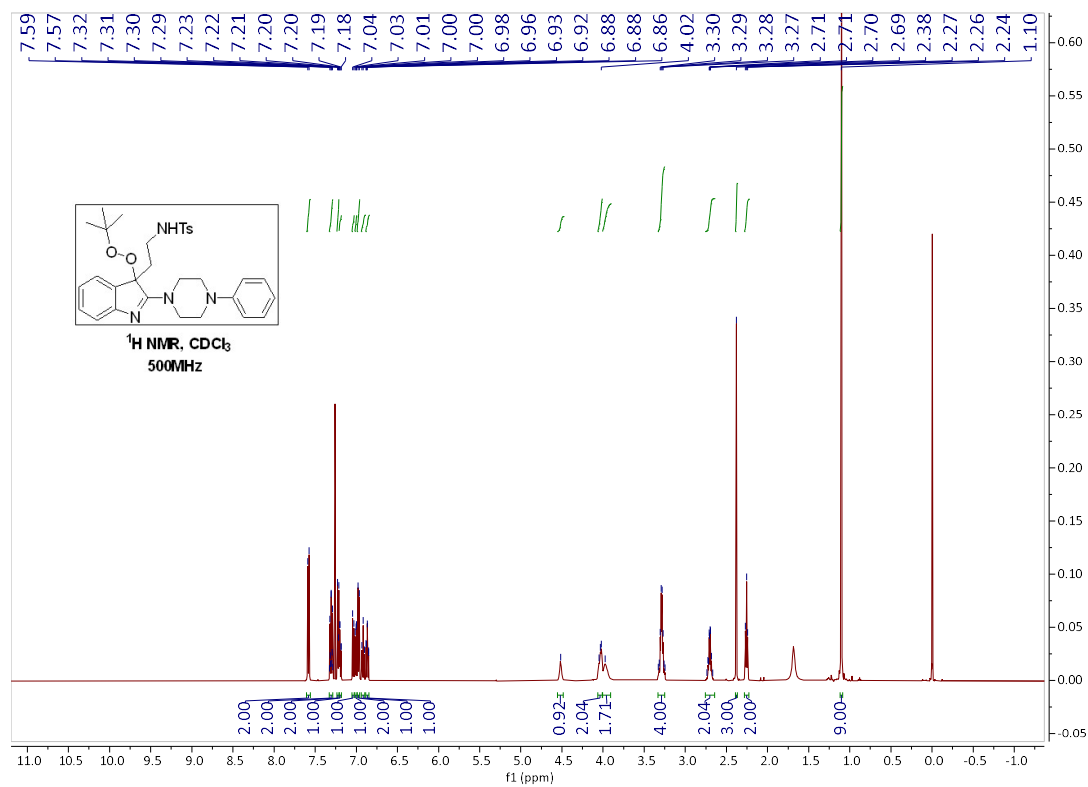

### <sup>13</sup>C NMR Spectrum of 16

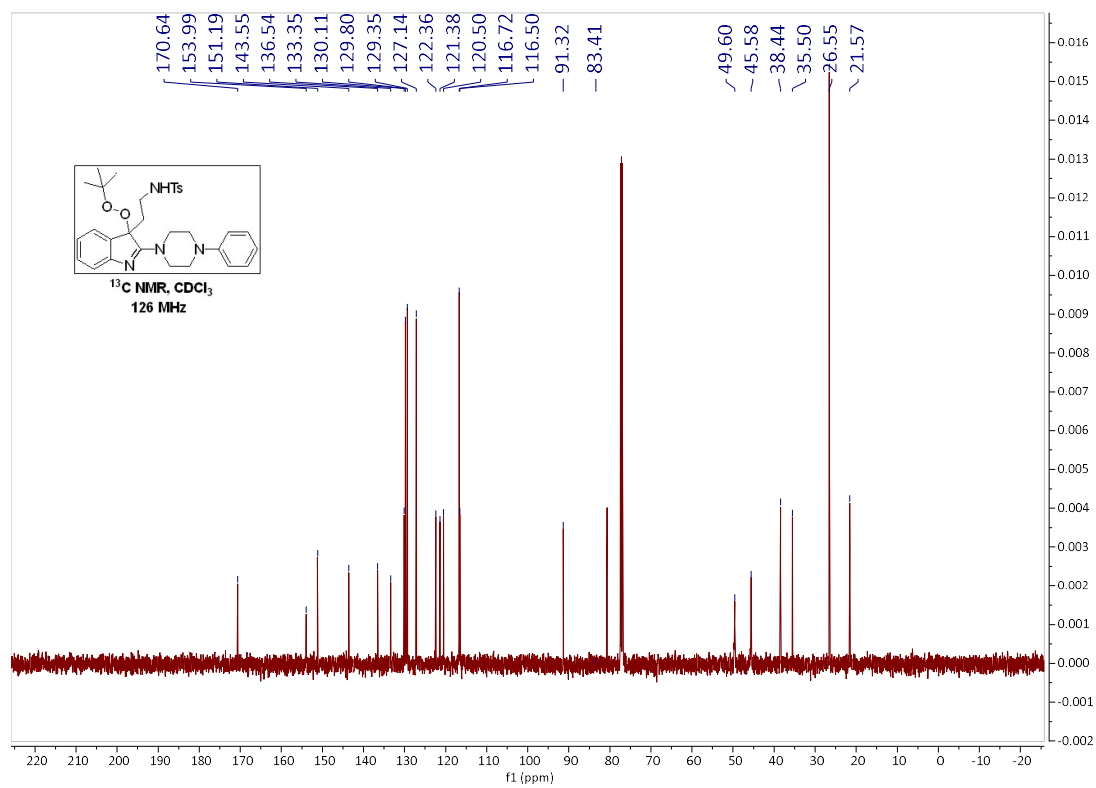

### <sup>1</sup>H NMR Spectrum of 17

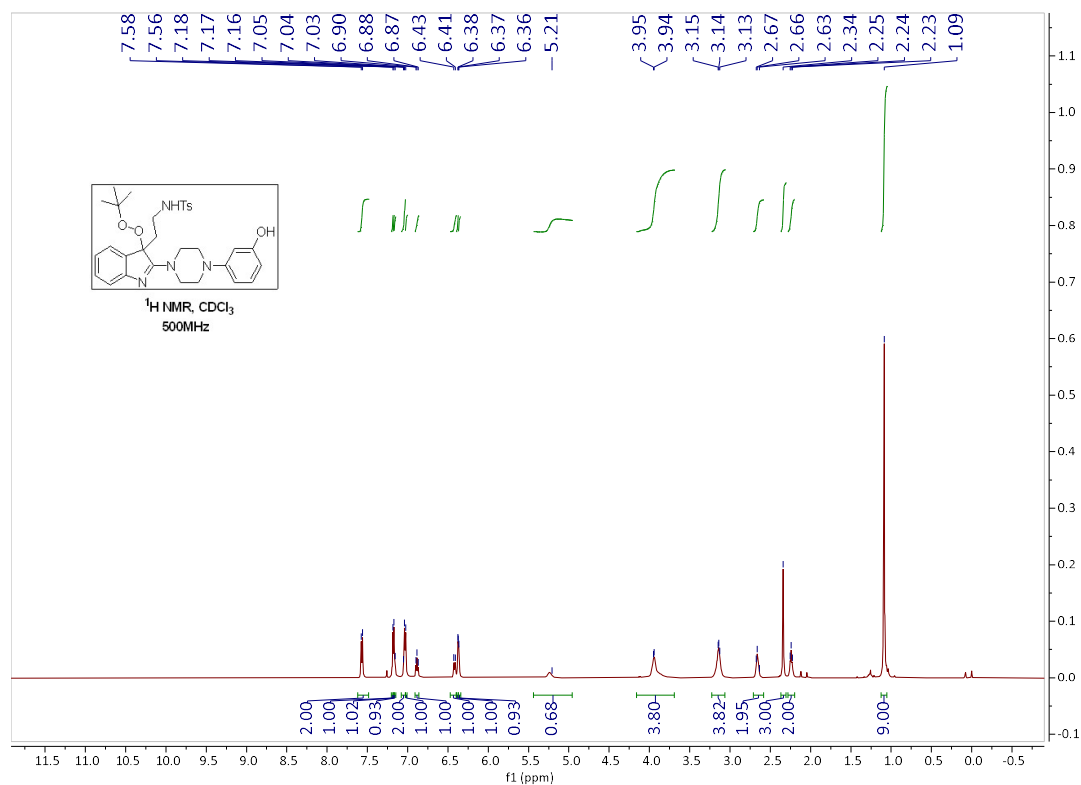

### <sup>13</sup>C NMR Spectrum of 17

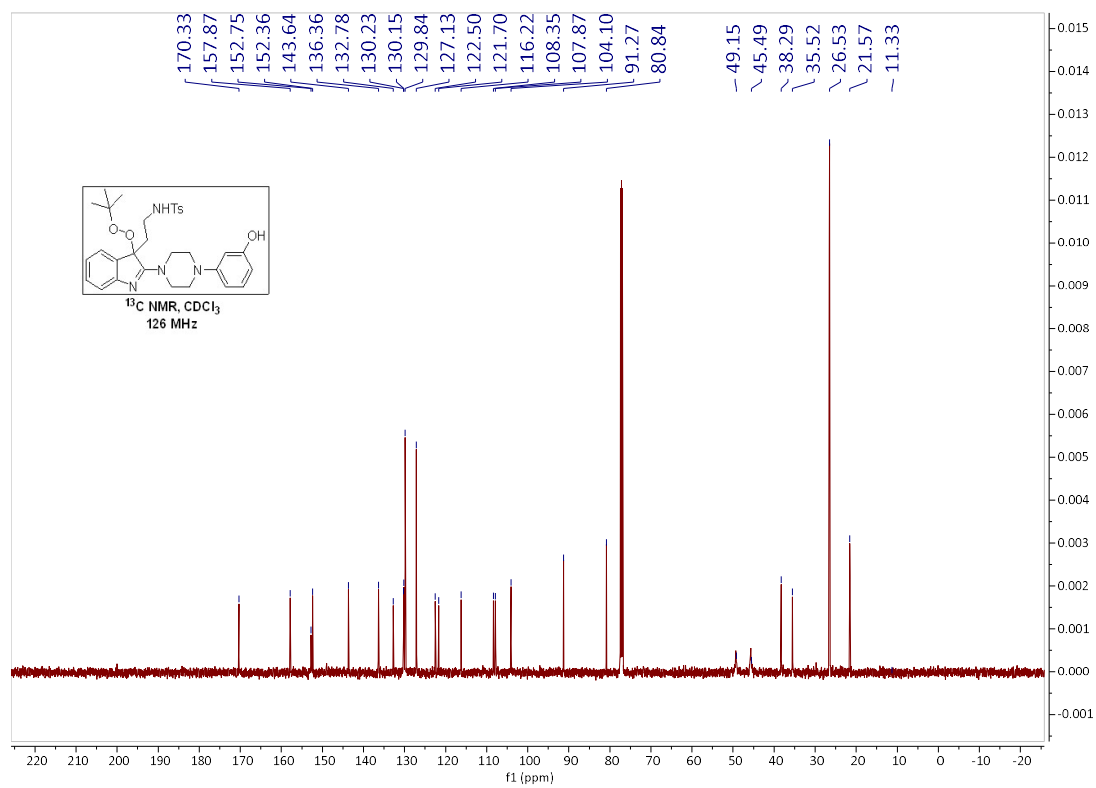

### <sup>1</sup>H NMR Spectrum of 18

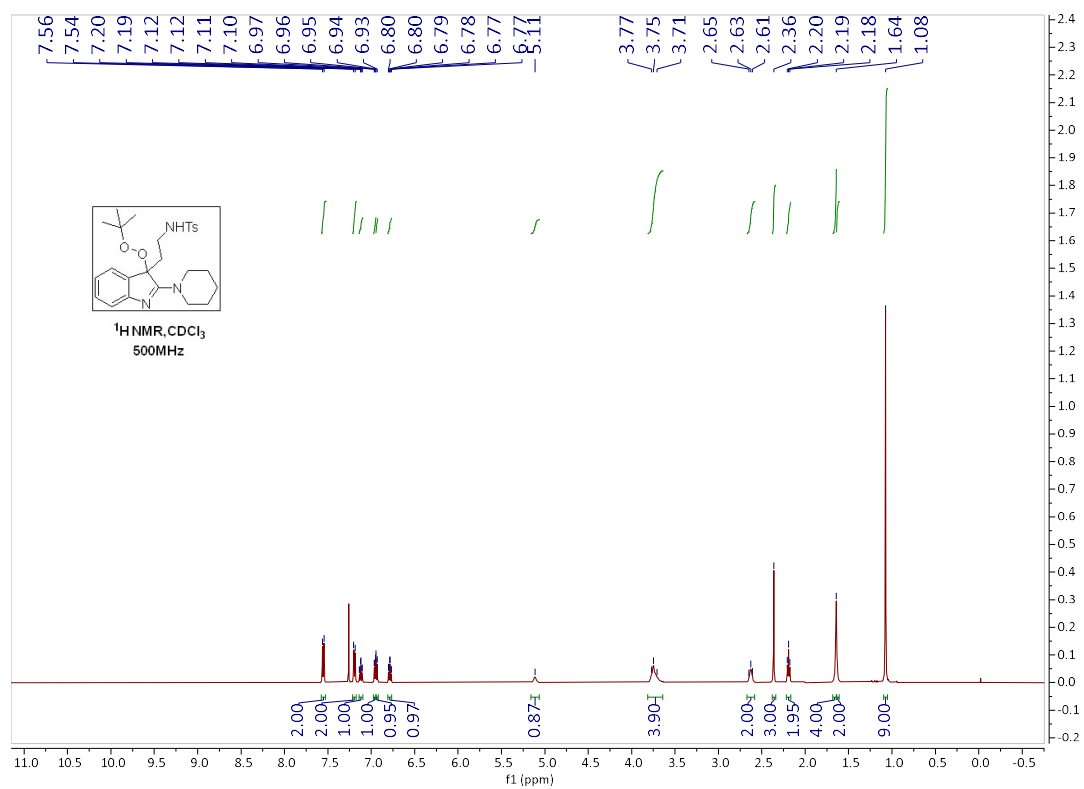

### <sup>13</sup>C NMR Spectrum of 18

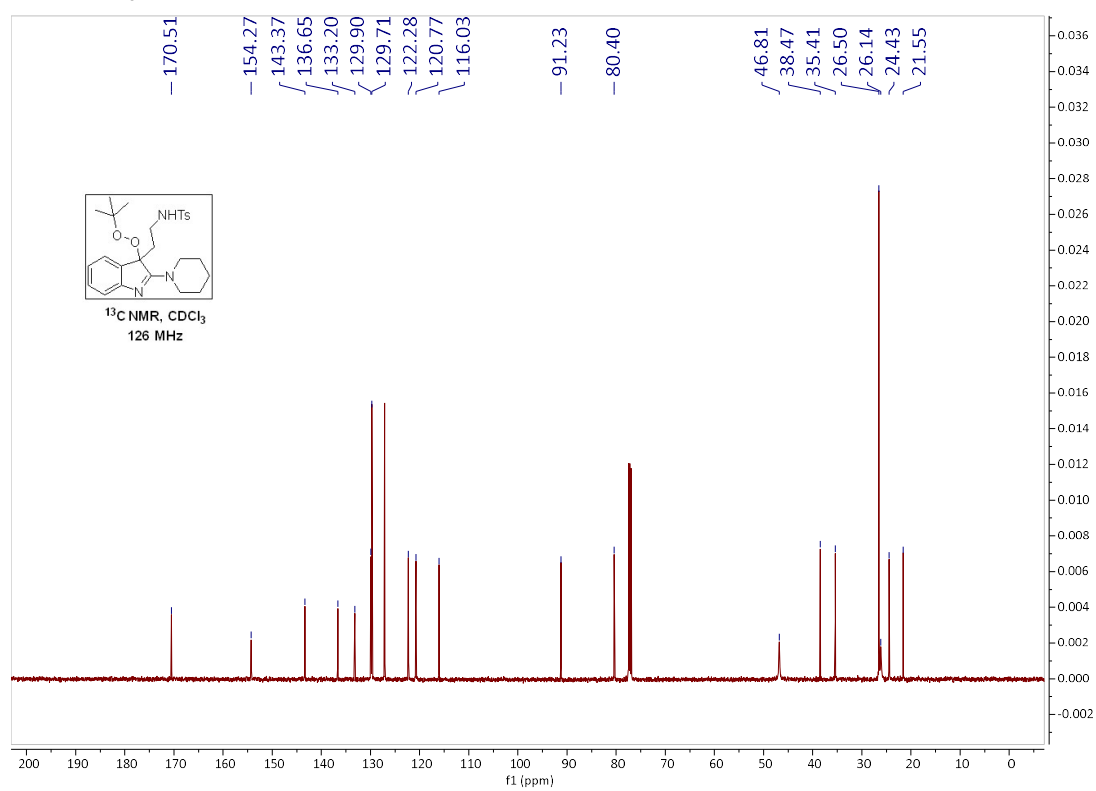



### <sup>1</sup>H NMR Spectrum of 19

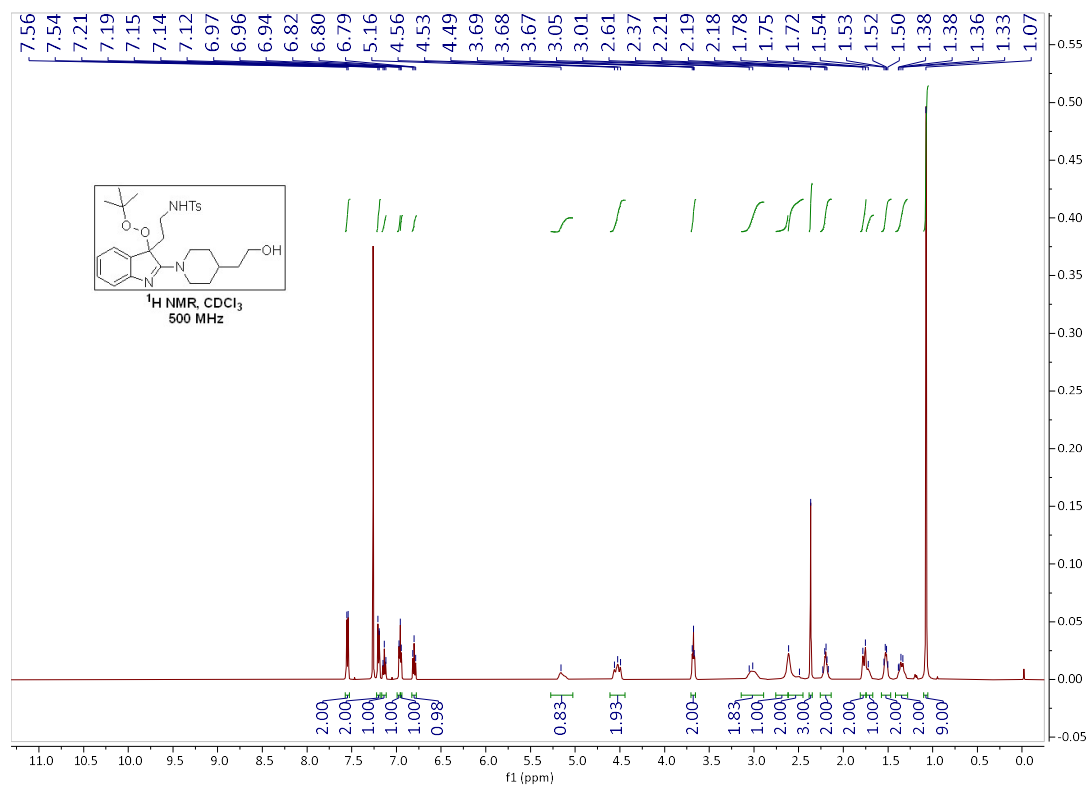

### <sup>13</sup>C NMR Spectrum of 19

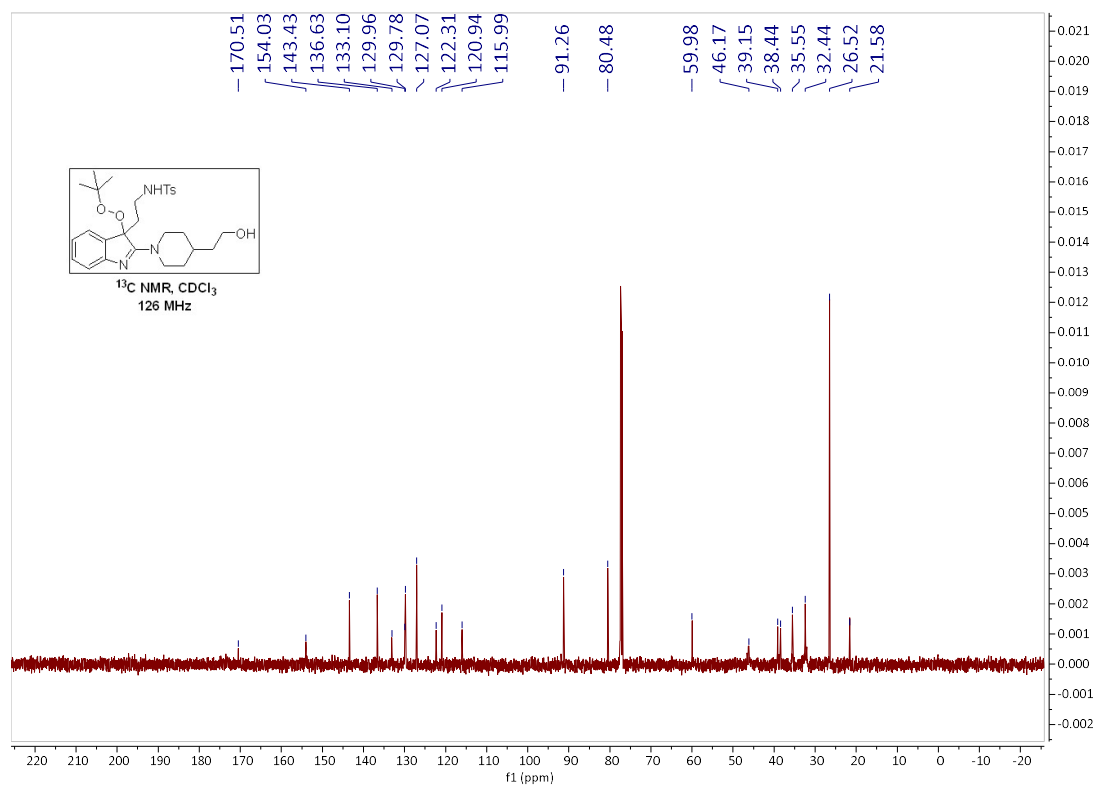

### <sup>1</sup>H NMR Spectrum of 20

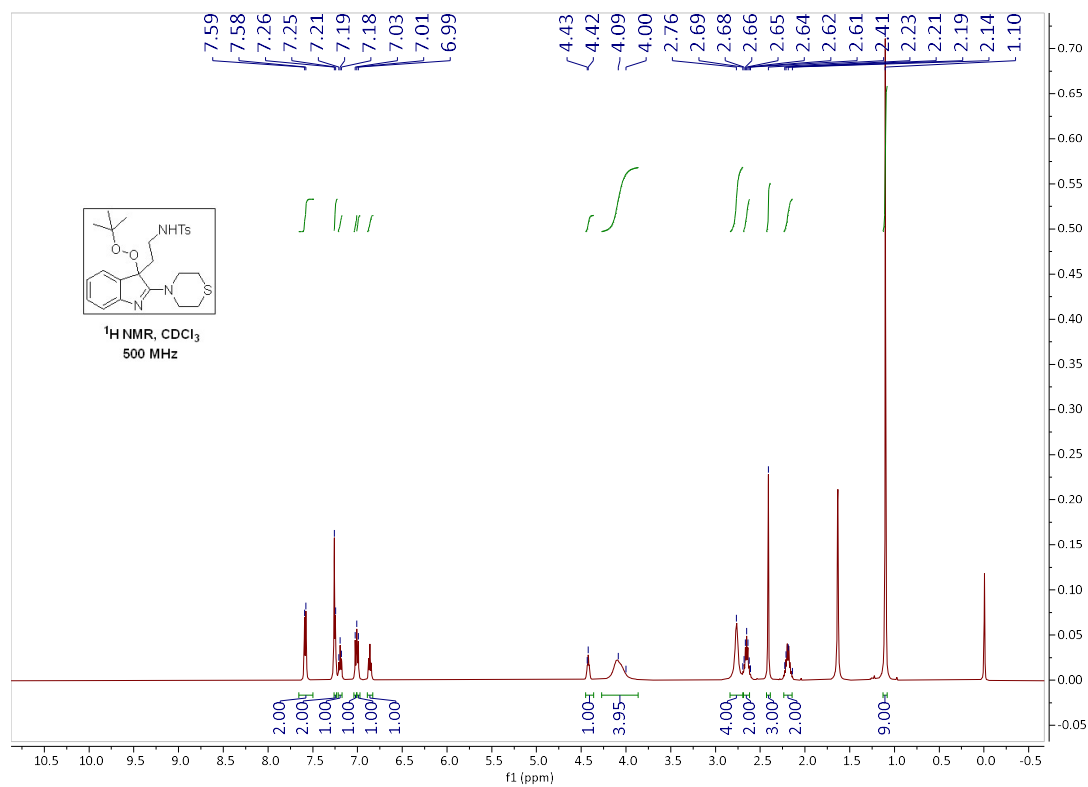

### <sup>13</sup>C NMR Spectrum of 20

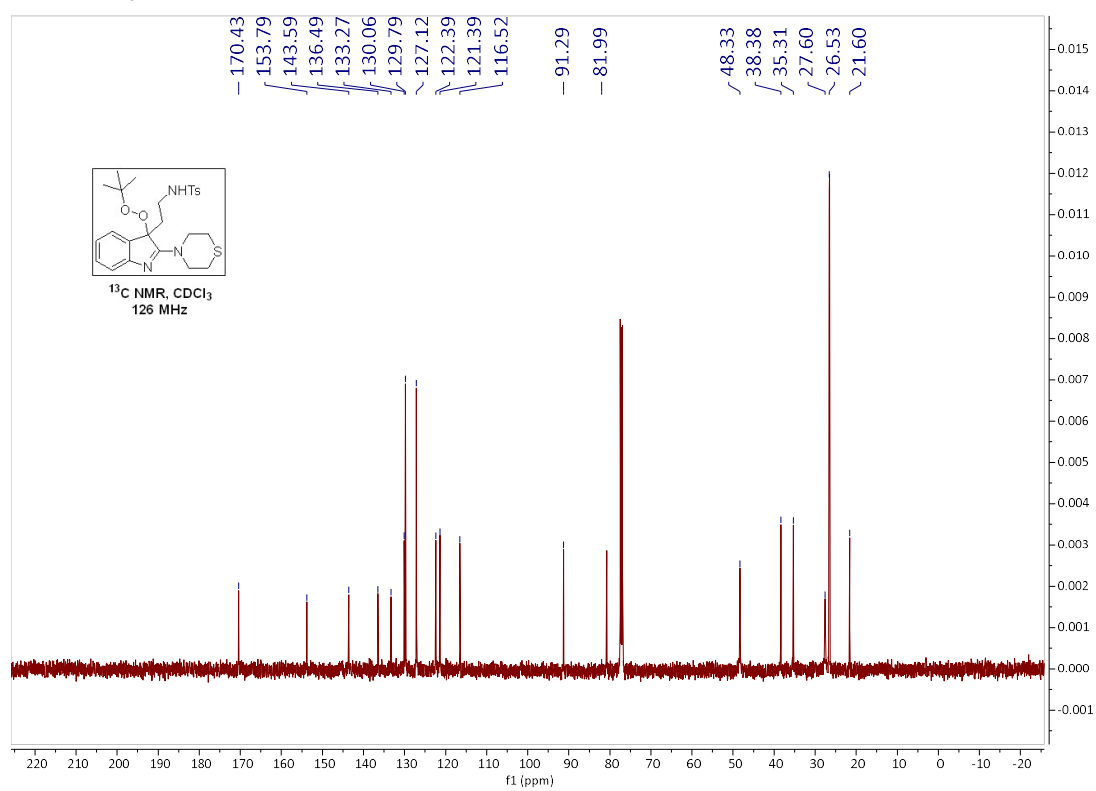

### <sup>1</sup>H NMR Spectrum of 21

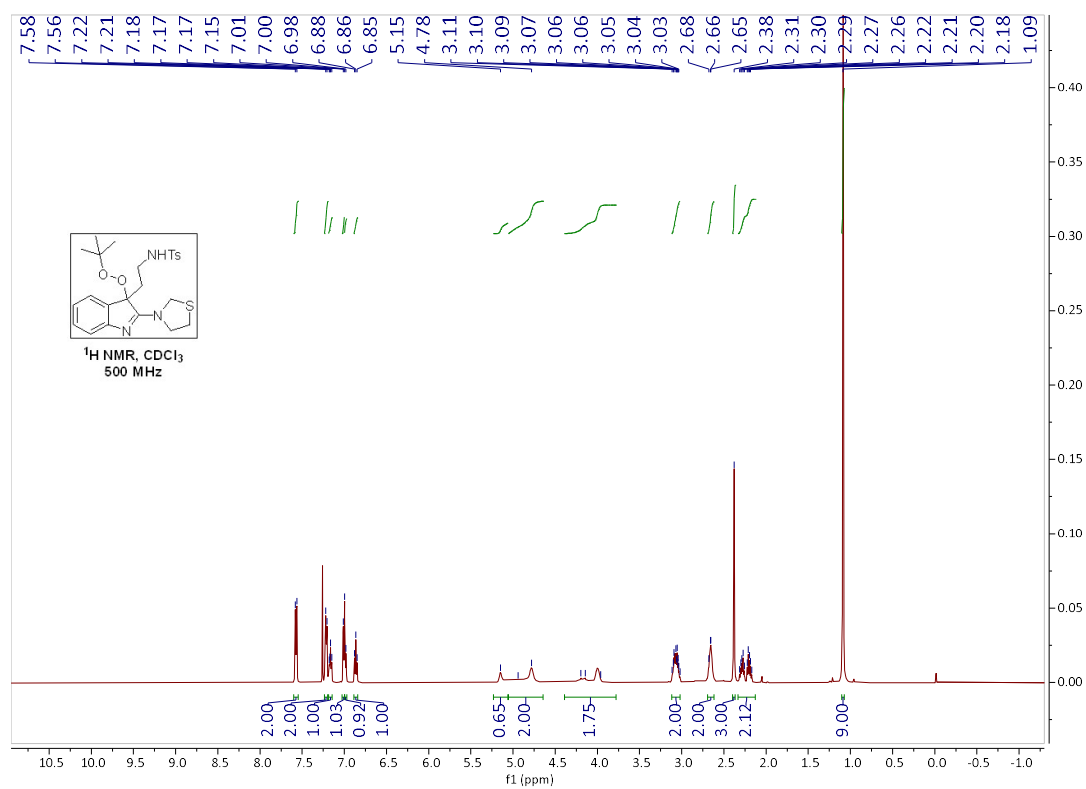

### <sup>13</sup>C NMR Spectrum of 21

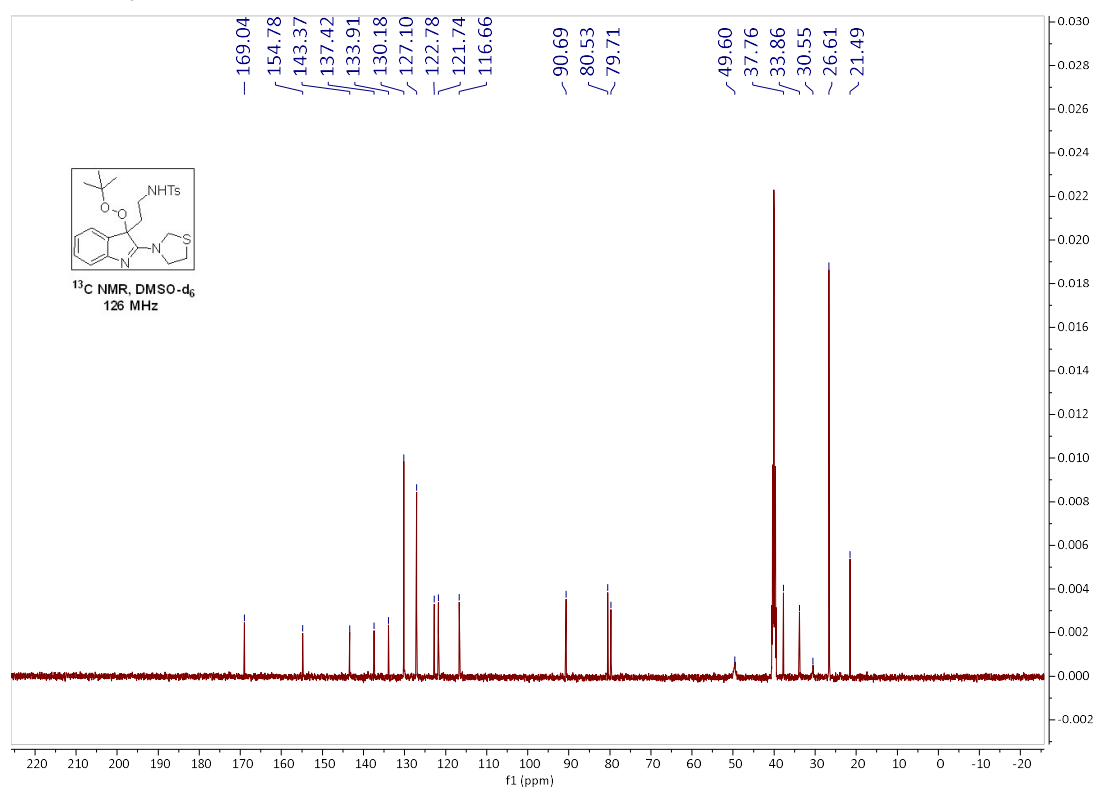

### <sup>1</sup>H NMR Spectrum of 22

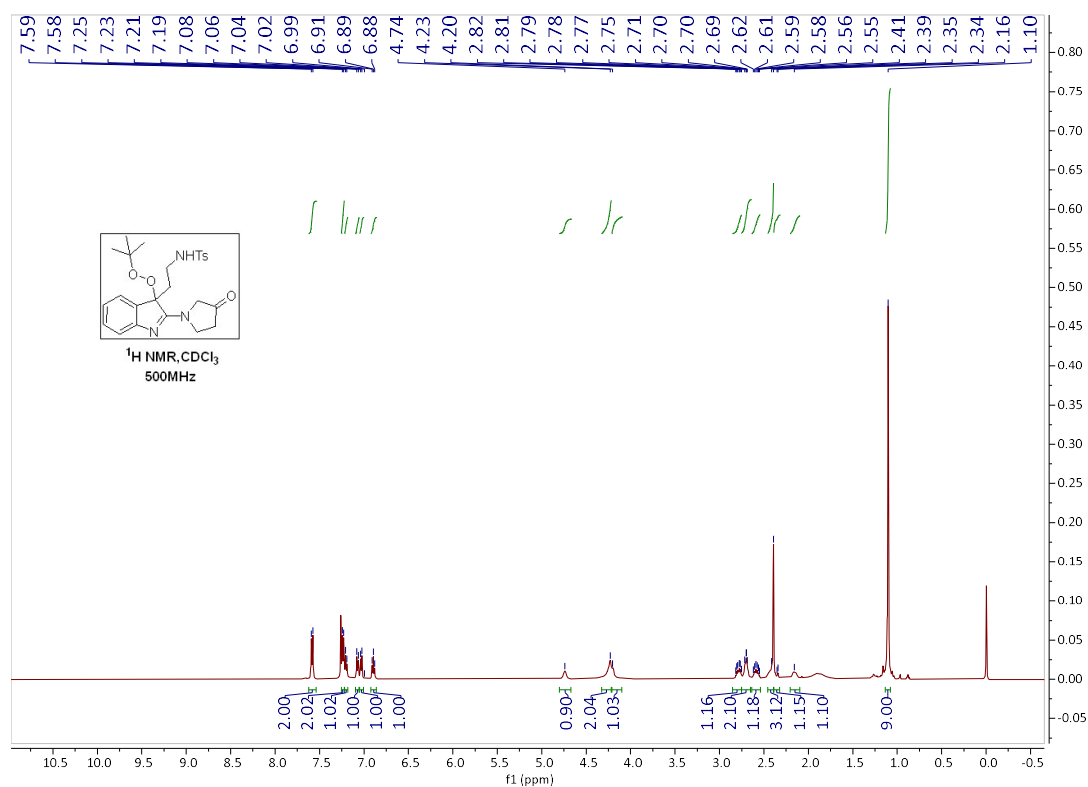

### <sup>13</sup>C NMR Spectrum of 22

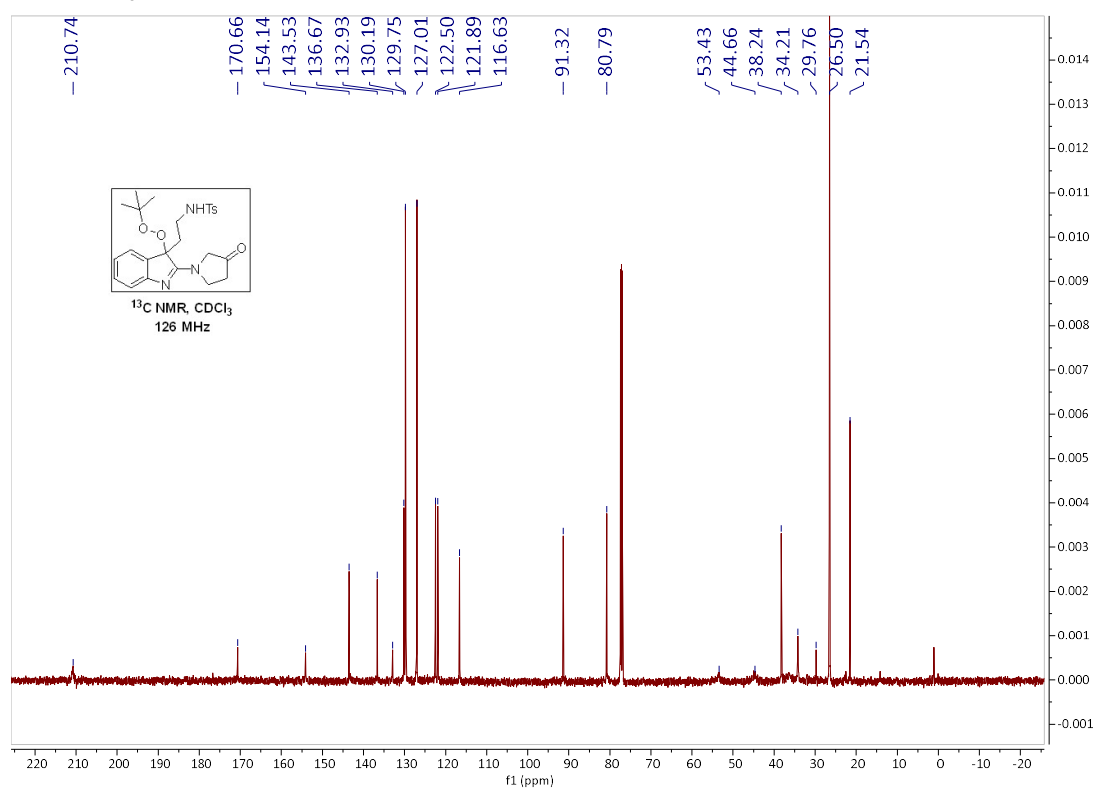

### <sup>1</sup>H NMR Spectrum of 23

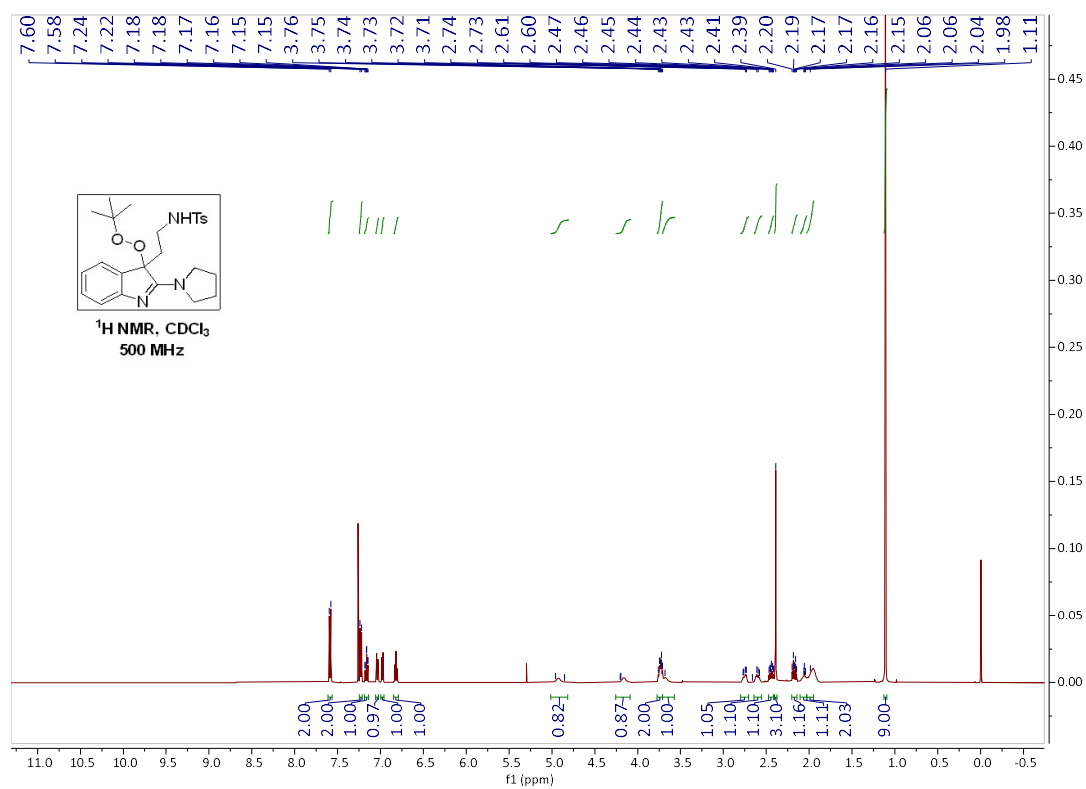

### <sup>13</sup>C NMR Spectrum of 23

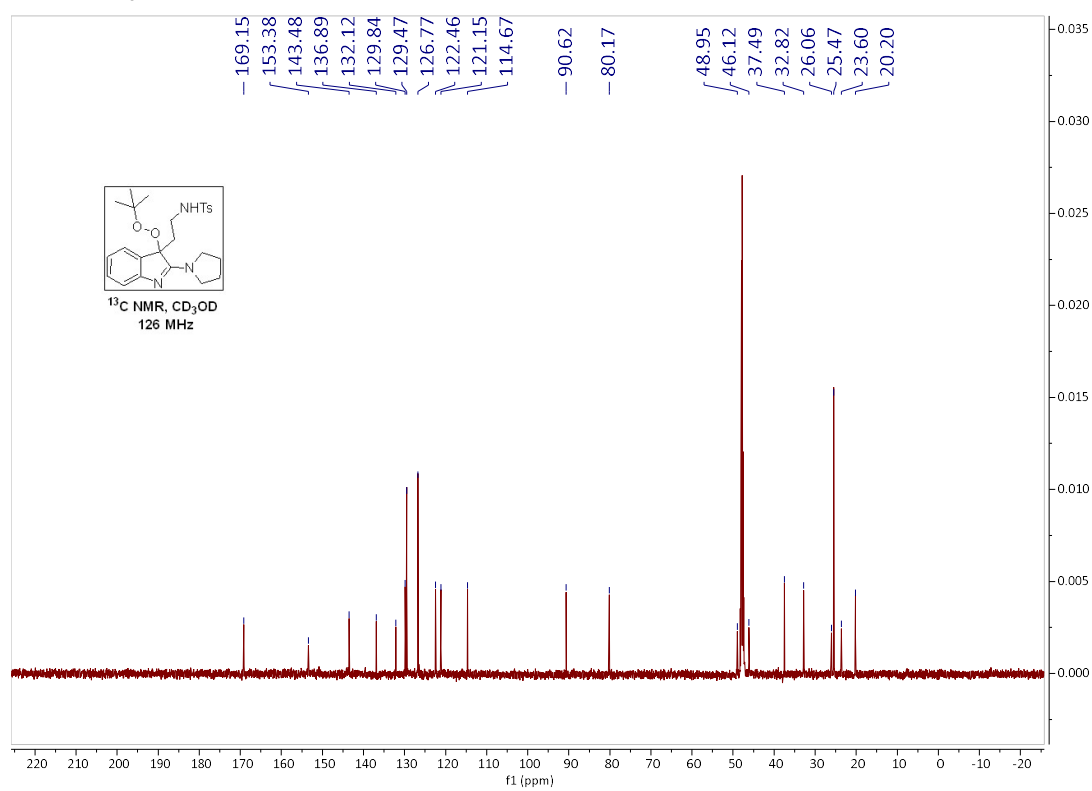

### <sup>1</sup>H NMR Spectrum of 24

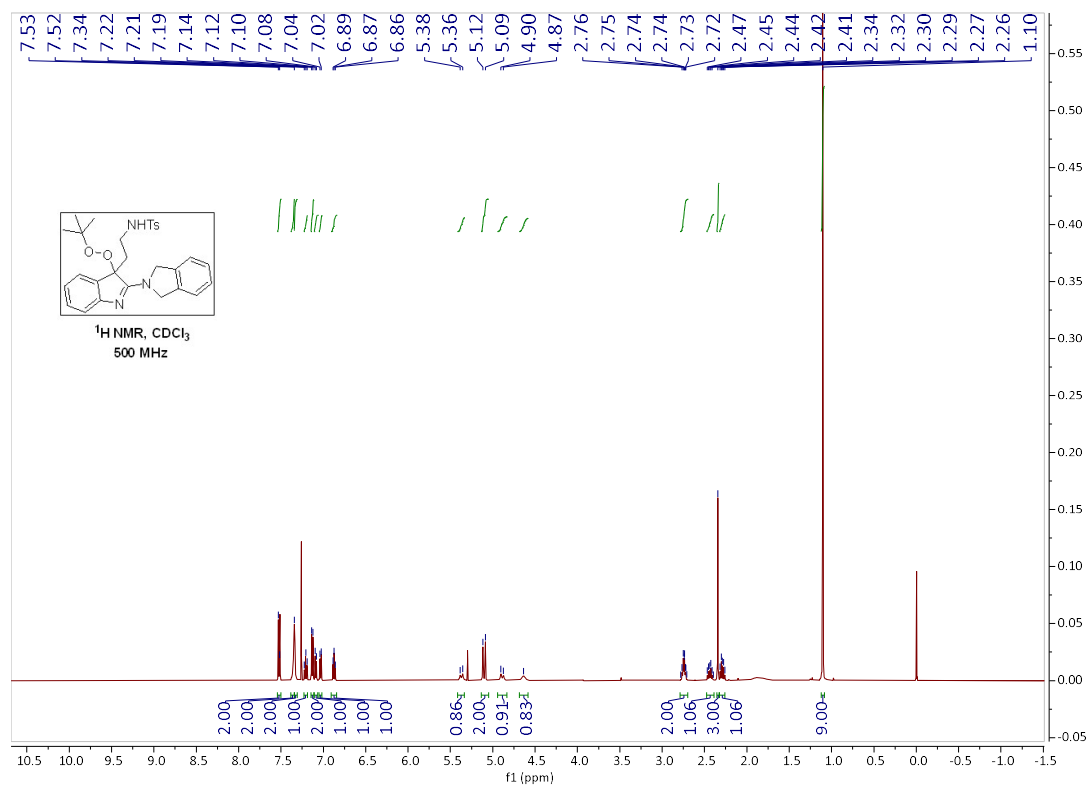

### <sup>13</sup>C NMR Spectrum of 24

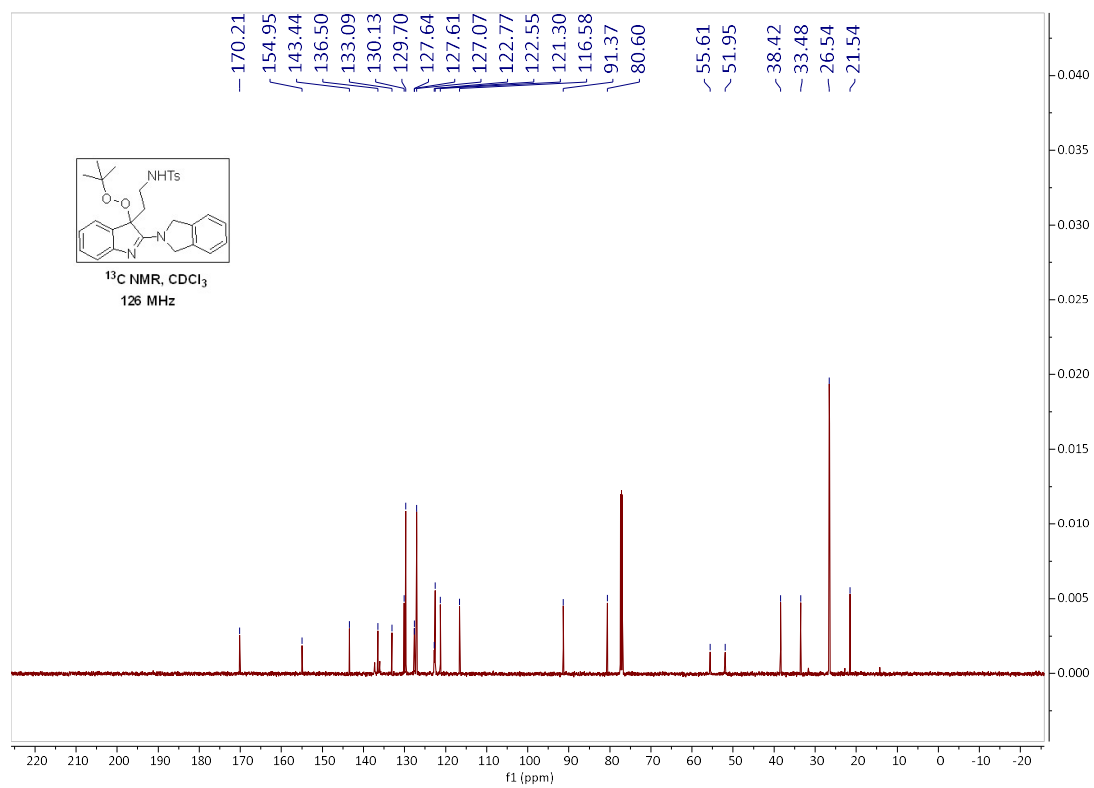

### <sup>1</sup>H NMR Spectrum of 25

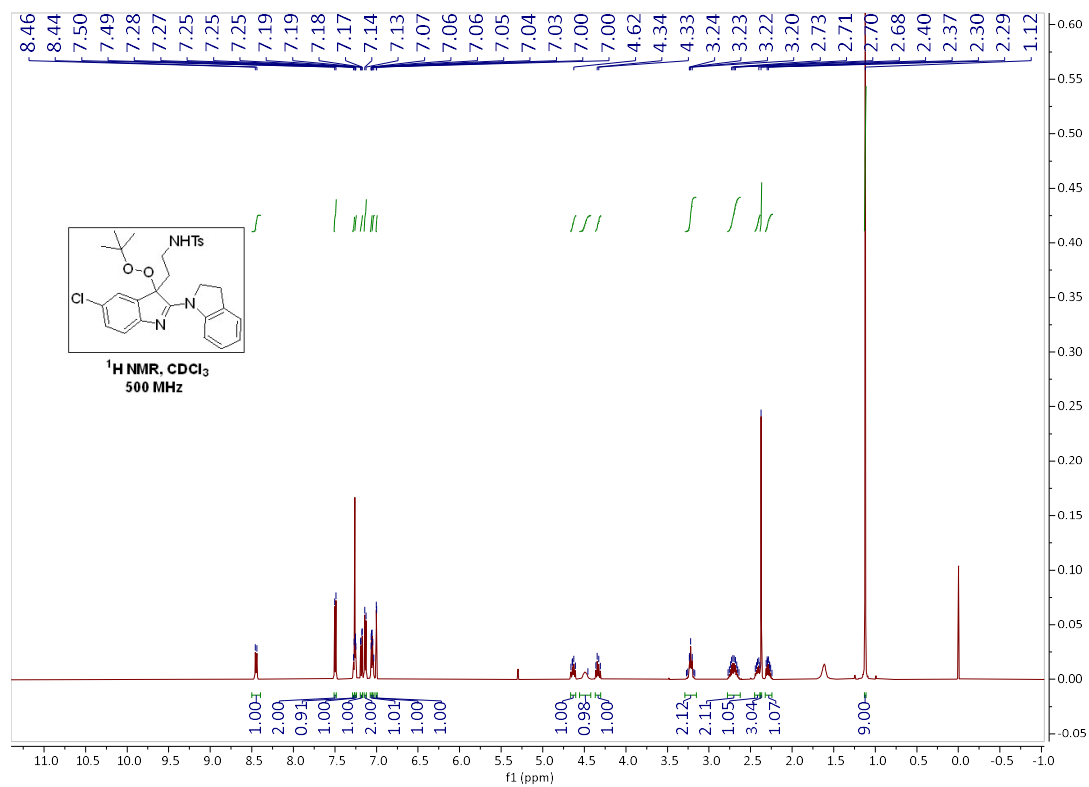

### <sup>13</sup>C NMR Spectrum of 25

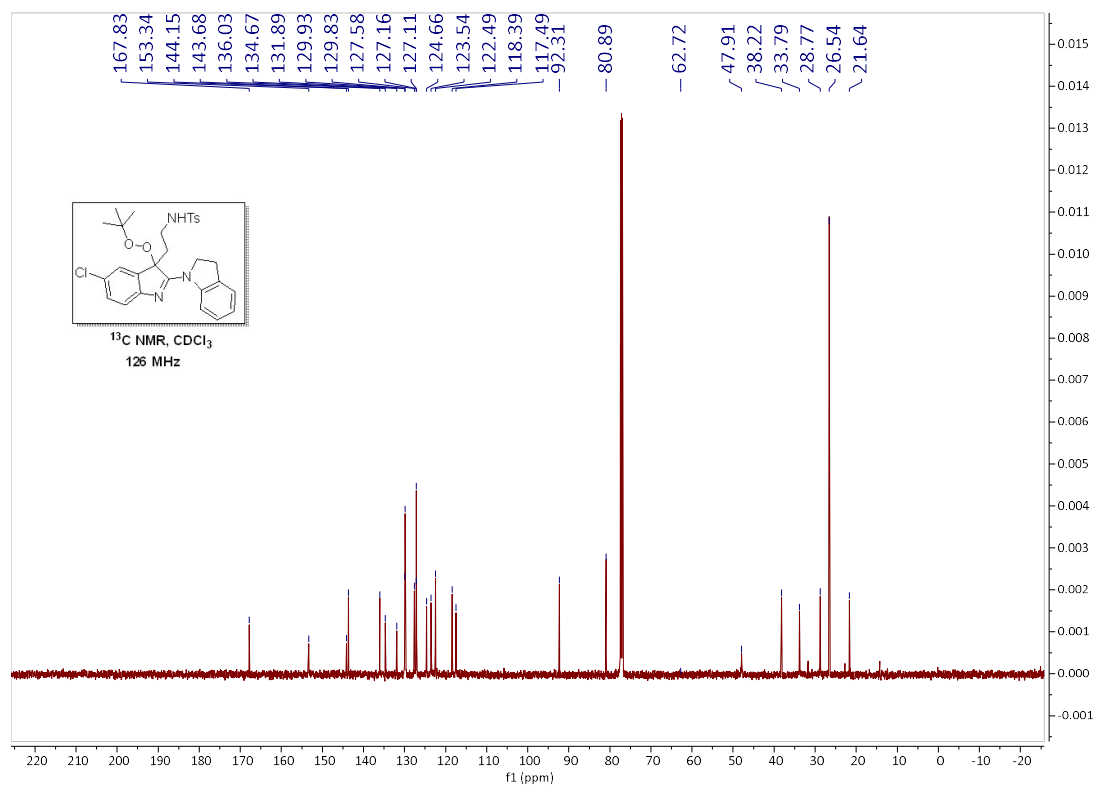

### <sup>1</sup>H NMR Spectrum of 26

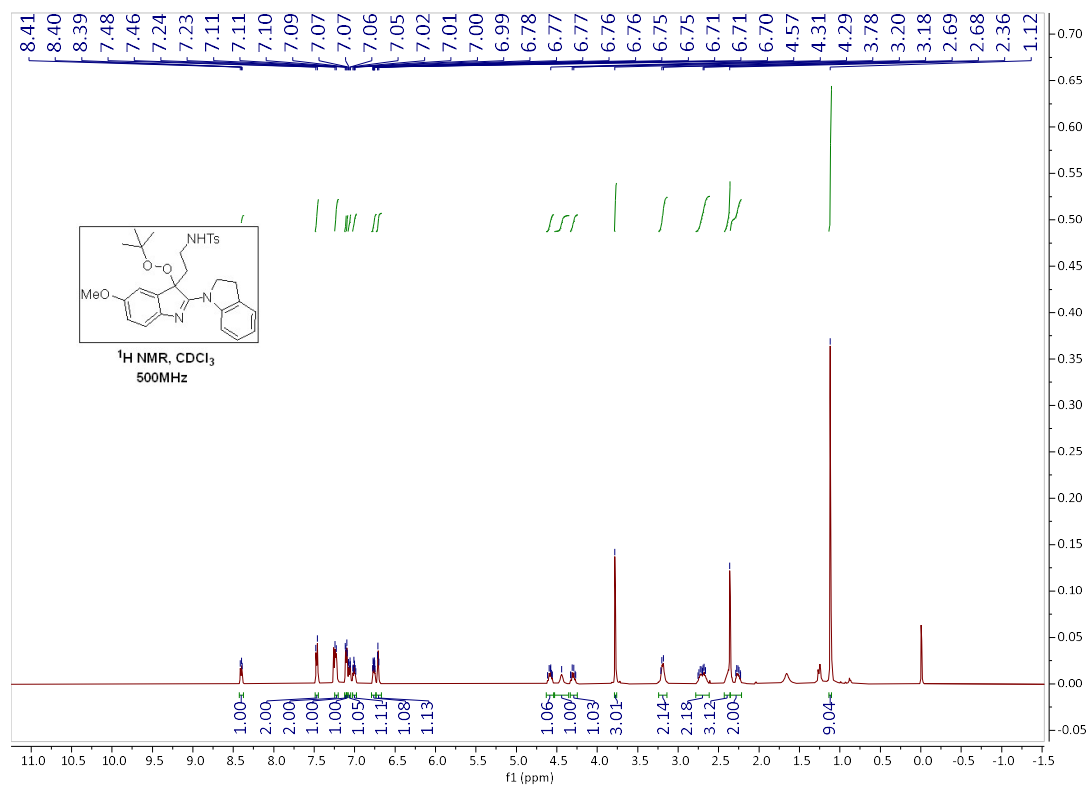

### <sup>13</sup>C NMR Spectrum of 26

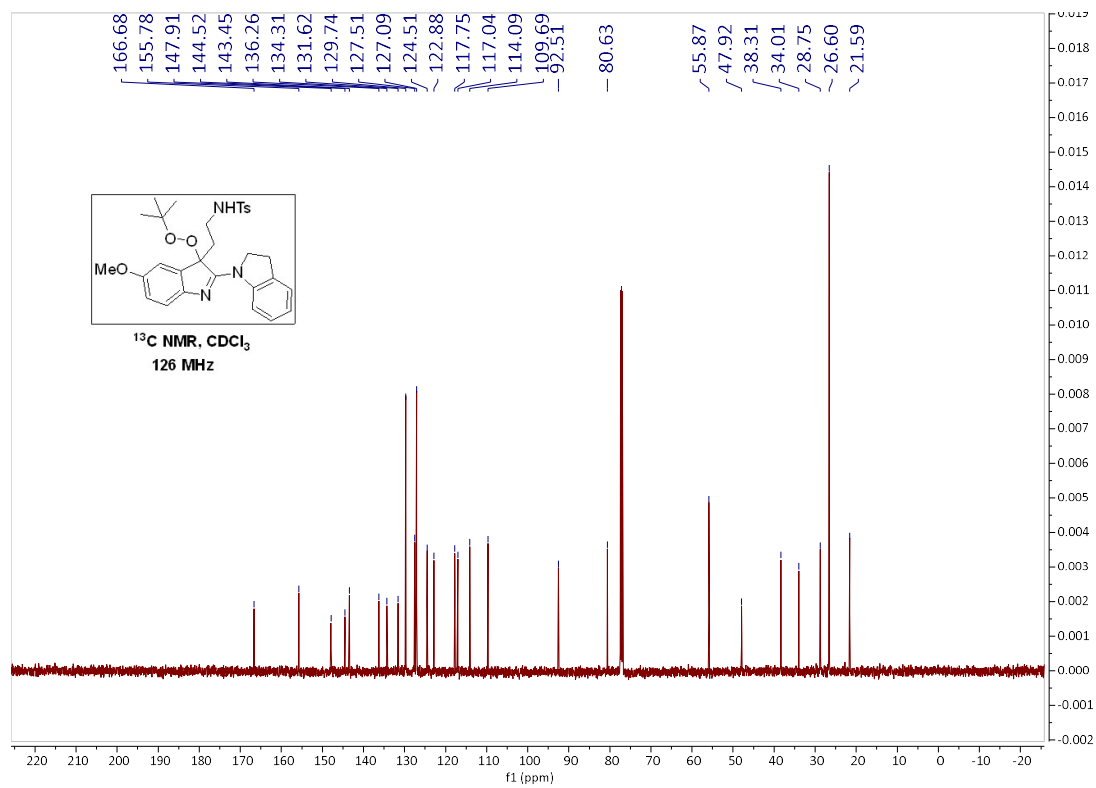



### <sup>1</sup>H NMR Spectrum of 27

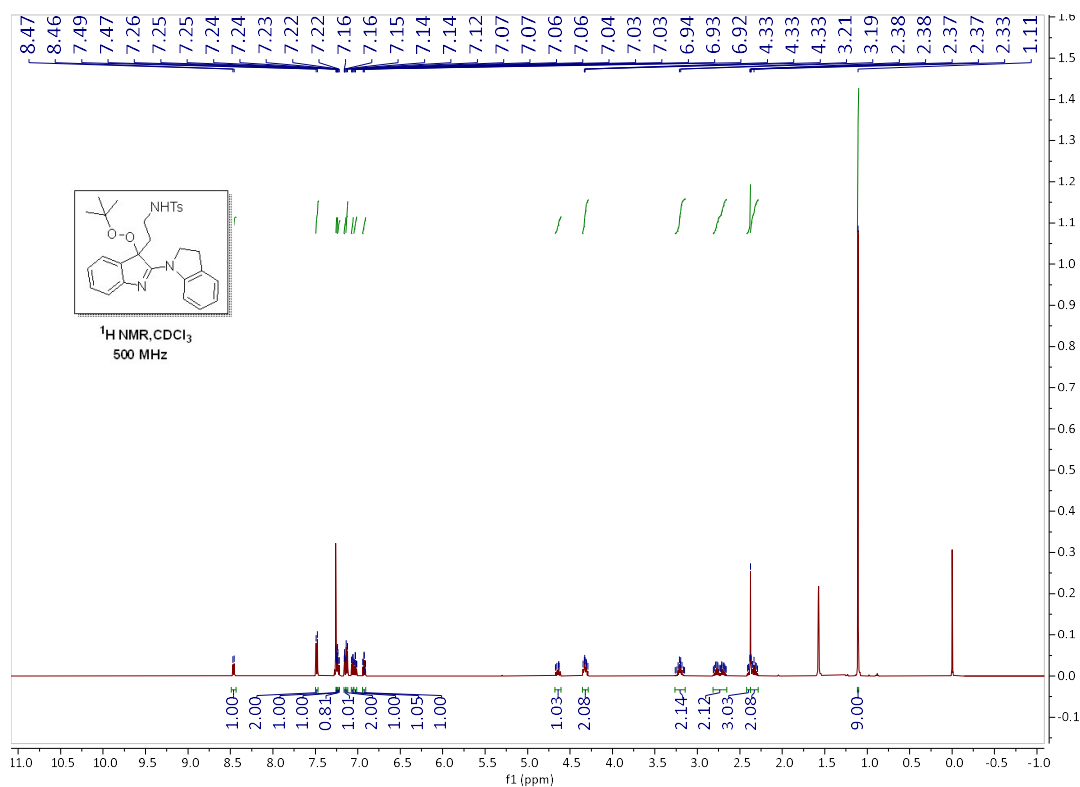

### <sup>13</sup>C NMR Spectrum of 27

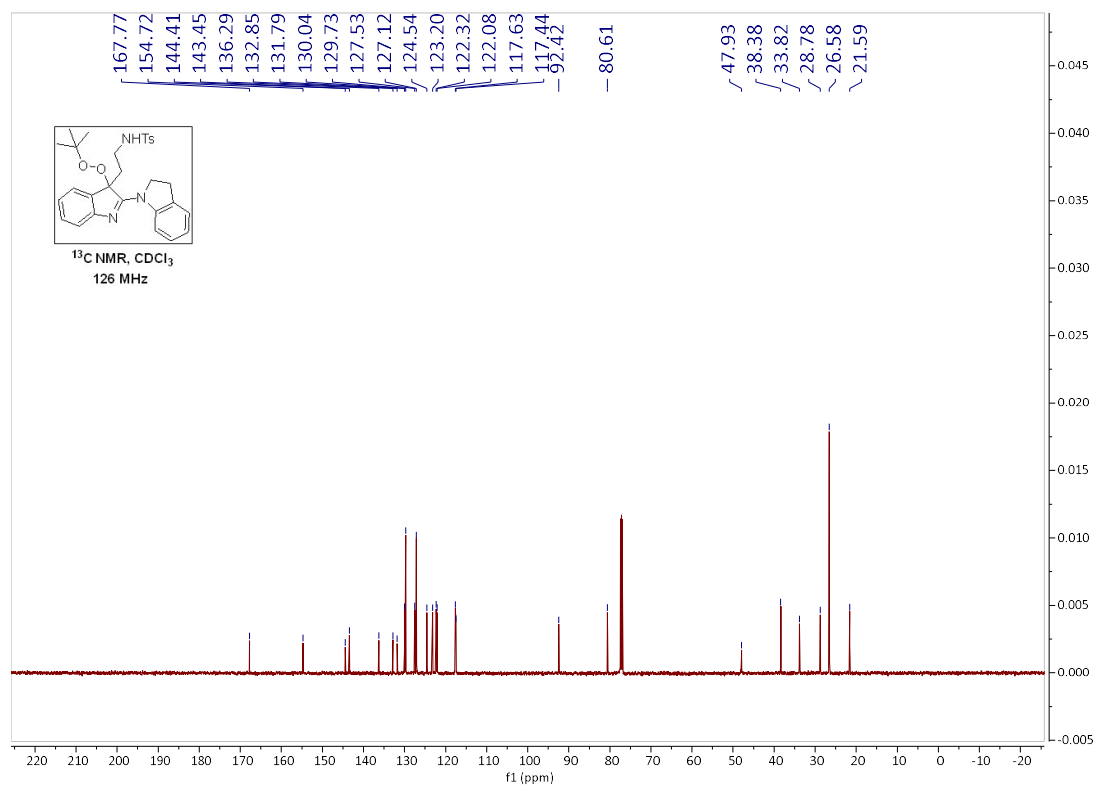

### <sup>1</sup>H NMR Spectrum of 28

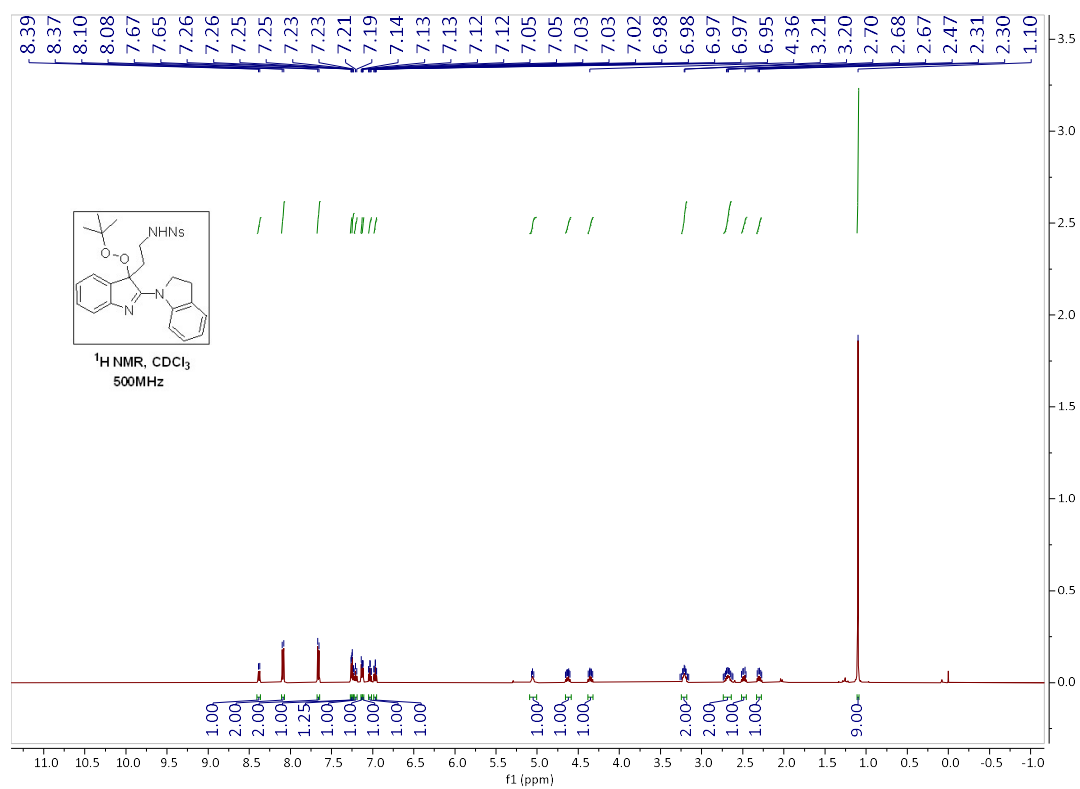

### <sup>13</sup>C NMR Spectrum of 28

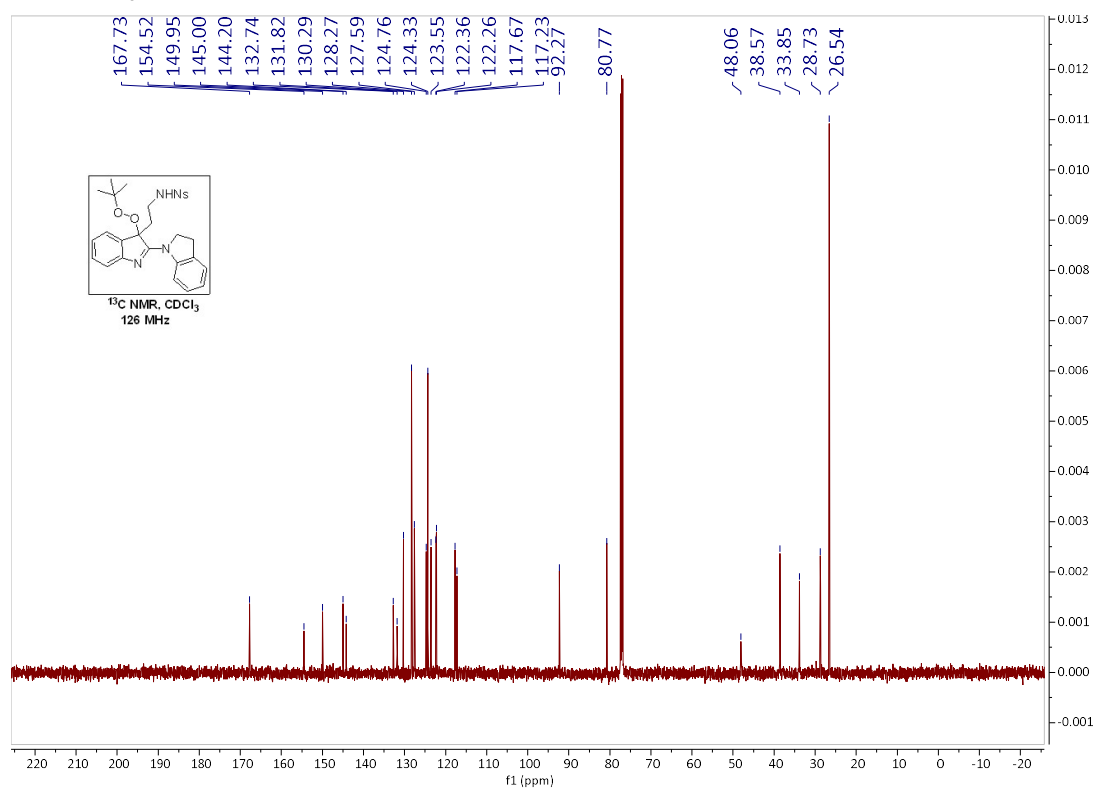

### <sup>1</sup>H NMR Spectrum of 29

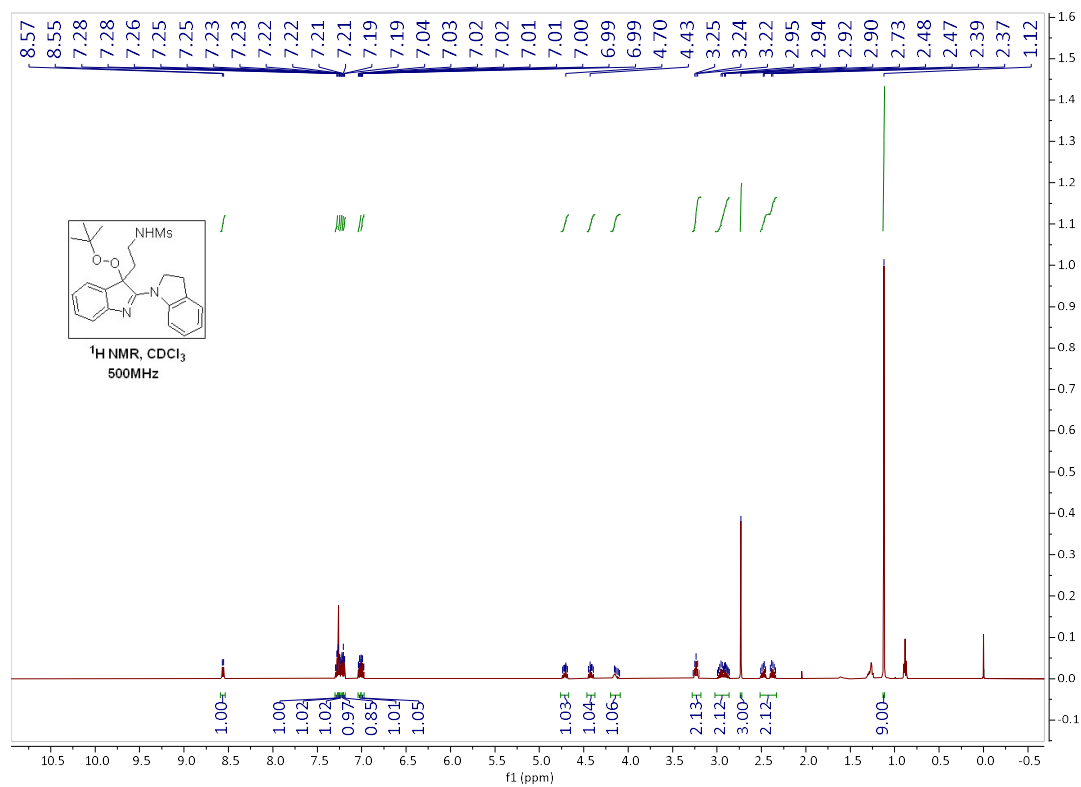

### <sup>13</sup>C NMR Spectrum of 29

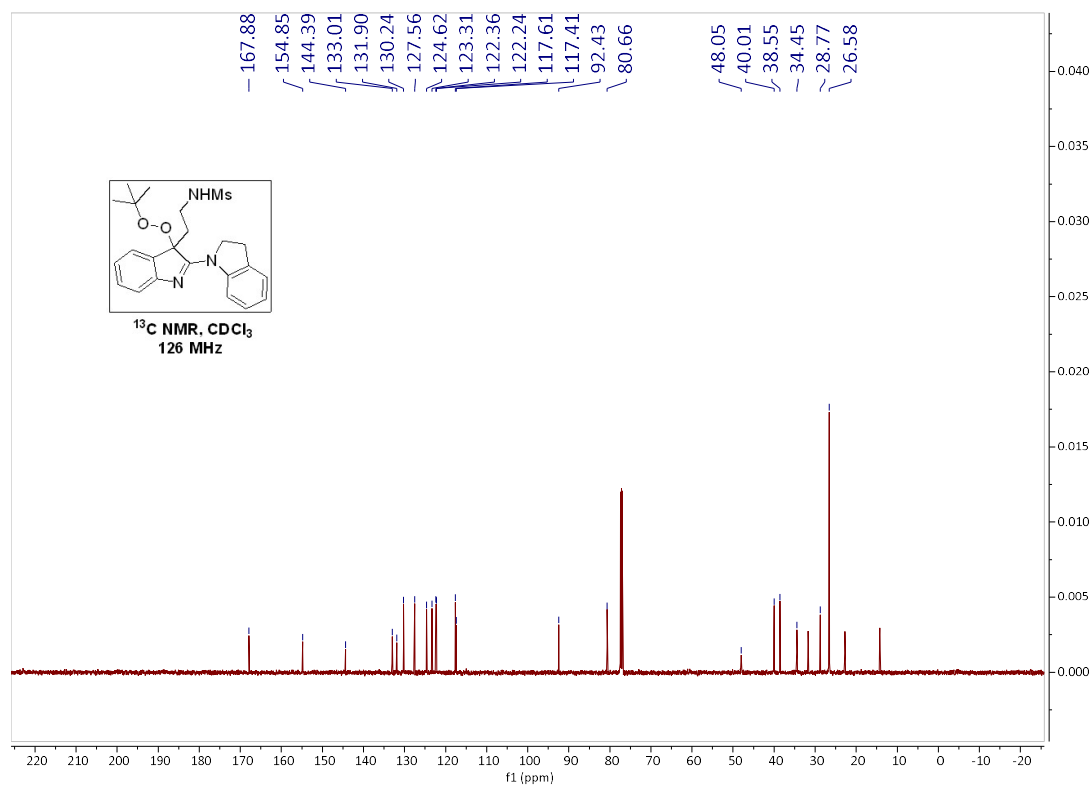

### <sup>1</sup>H NMR Spectrum of 30

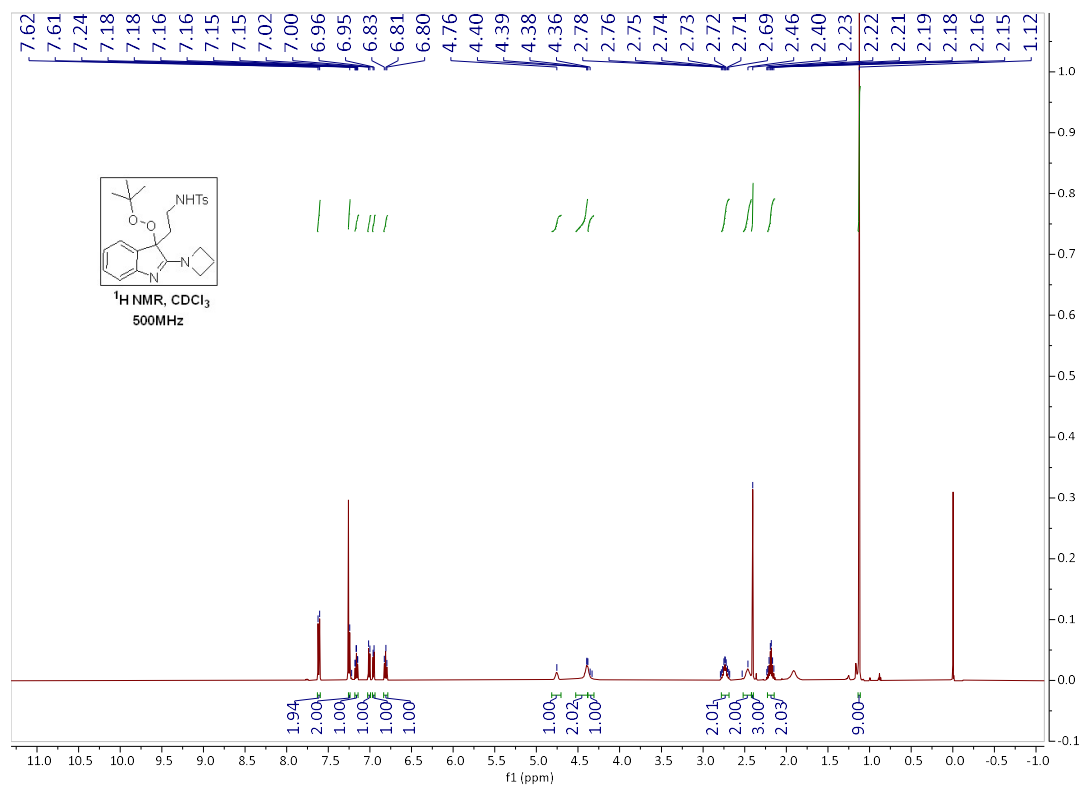

### <sup>13</sup>C NMR Spectrum of 30

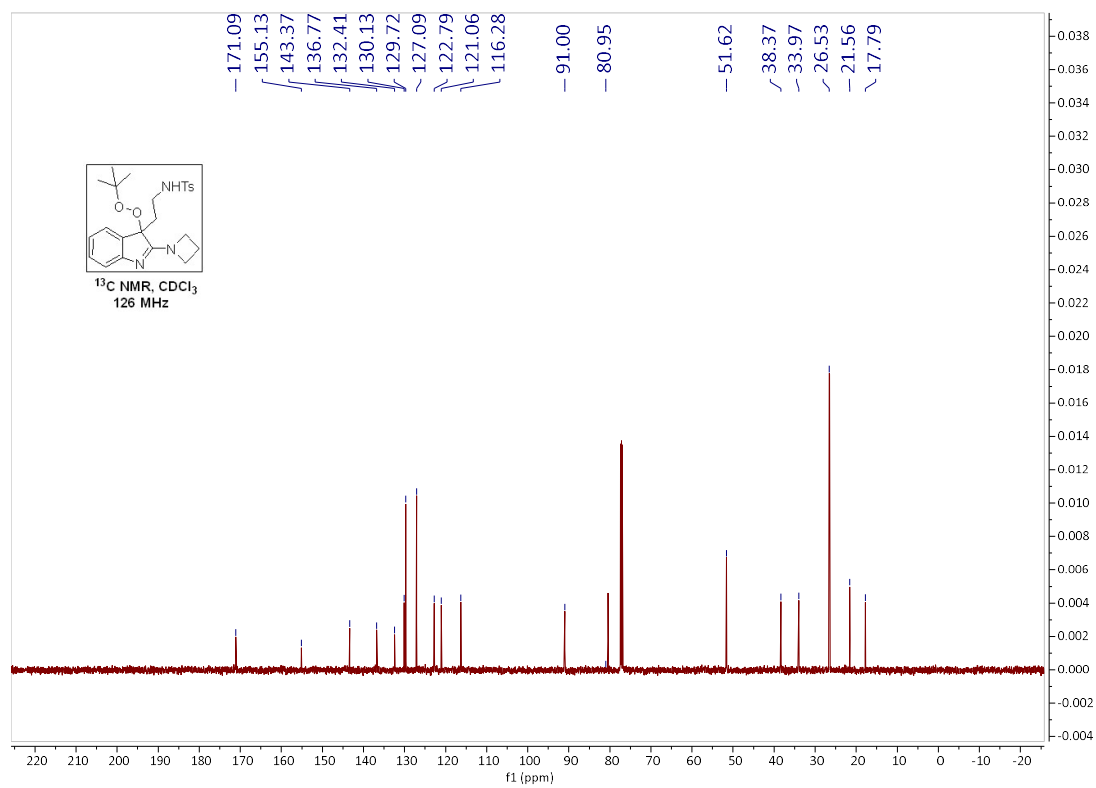

### <sup>1</sup>H NMR Spectrum of 31

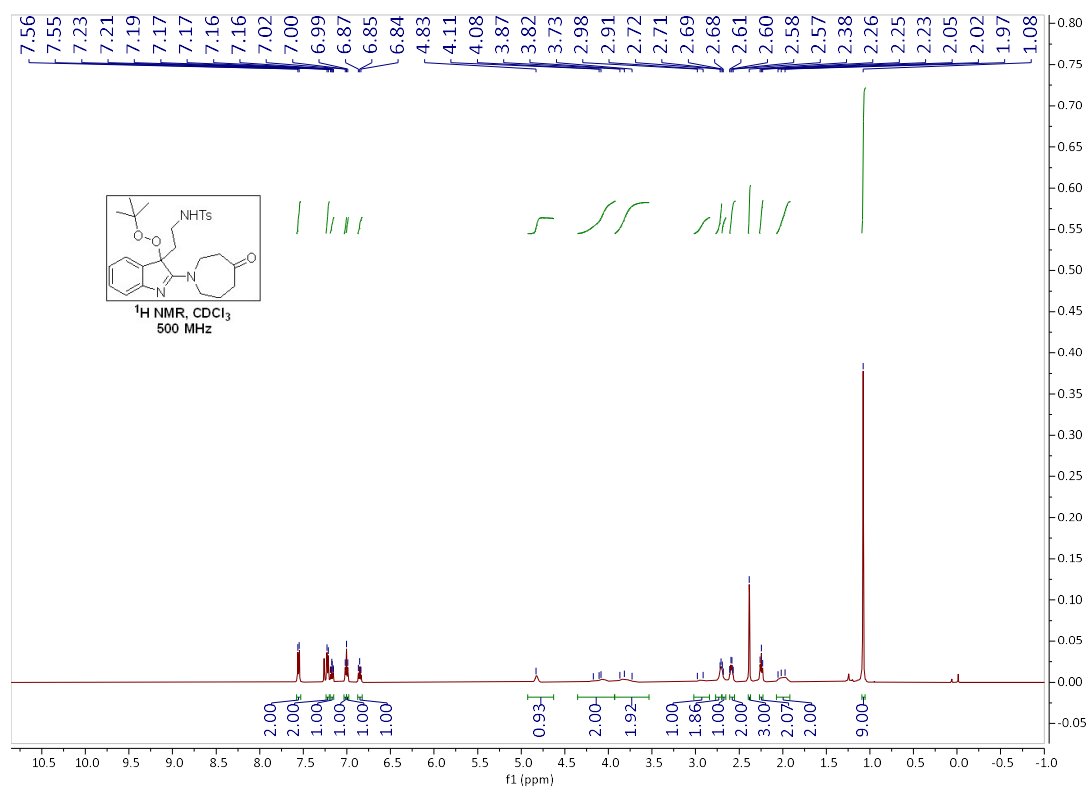

### <sup>13</sup>C NMR Spectrum of 31

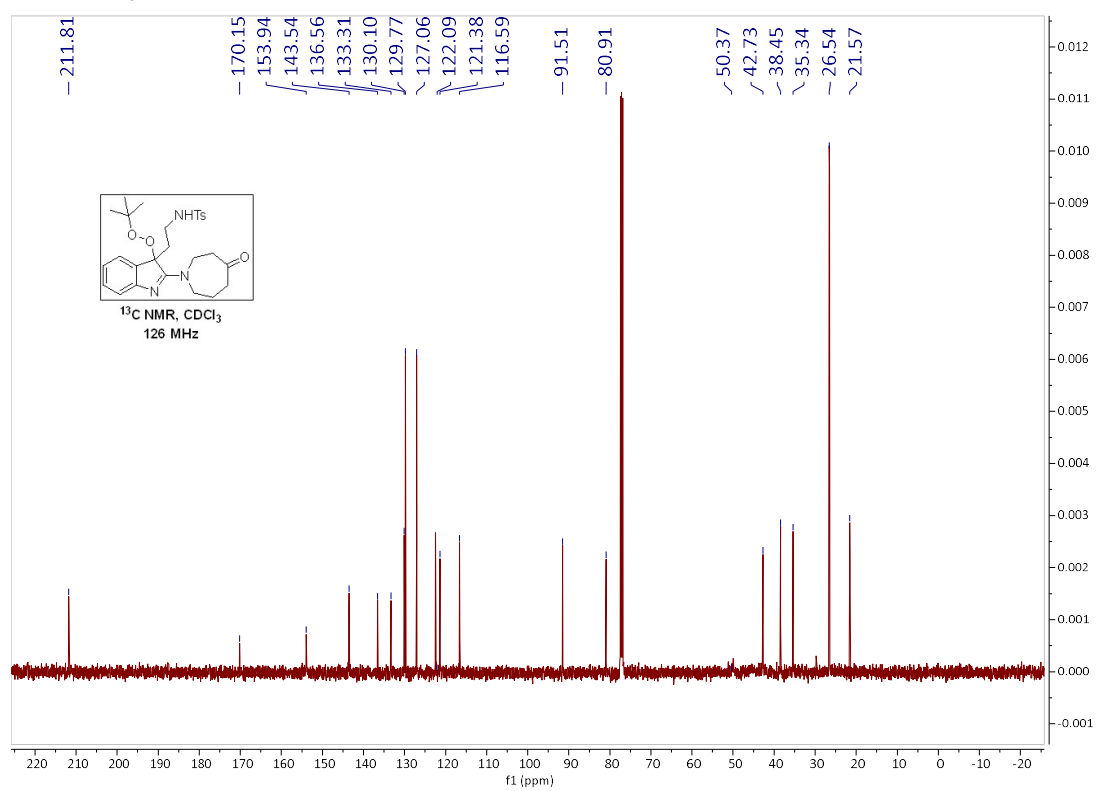

### <sup>1</sup>H NMR Spectrum of 32

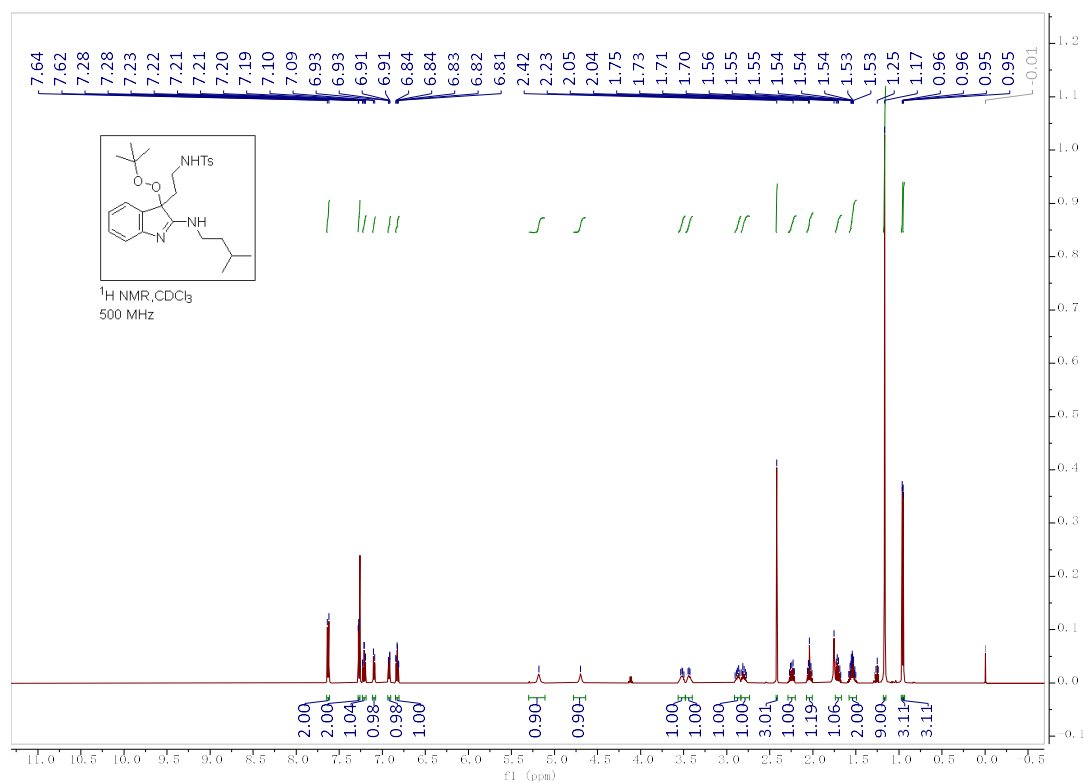

### <sup>13</sup>C NMR Spectrum of 32

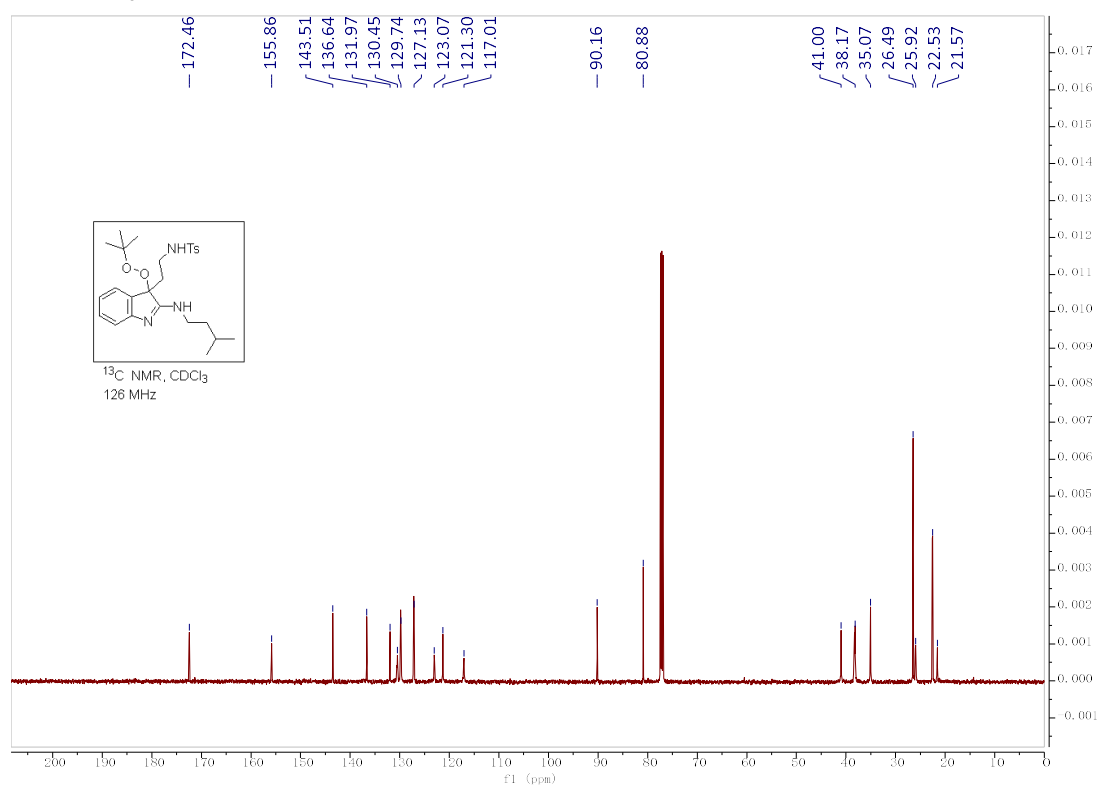

### <sup>1</sup>H NMR Spectrum of 33

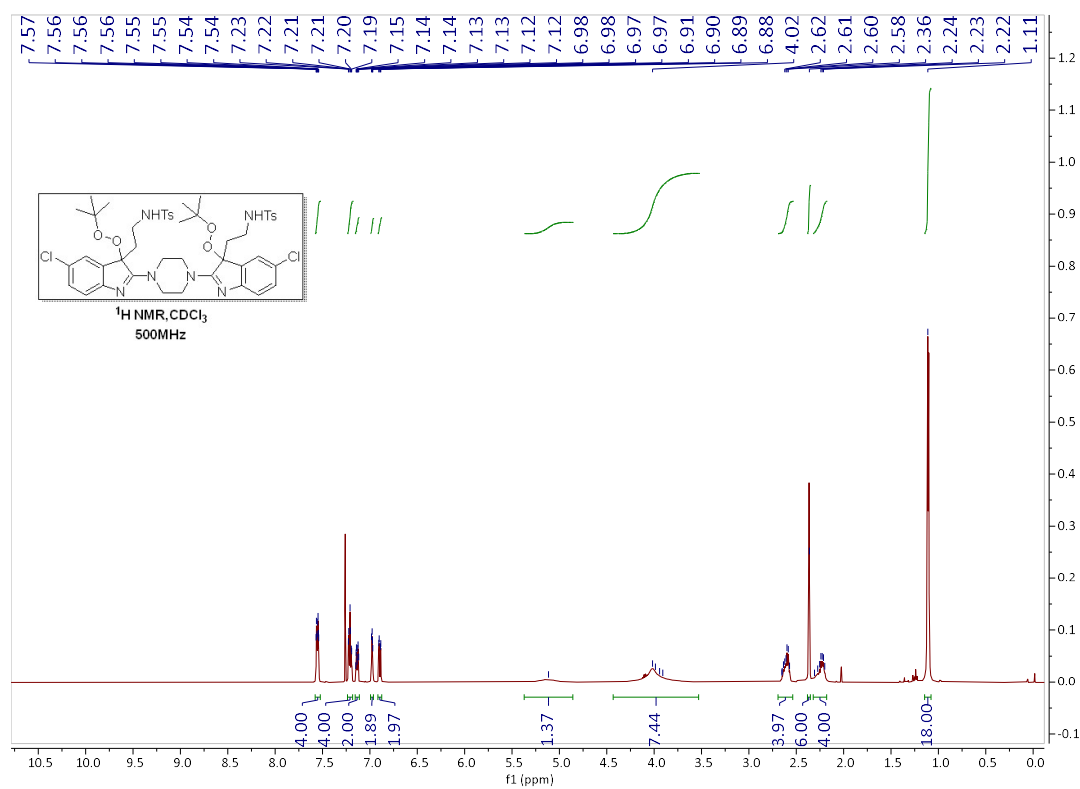

### <sup>13</sup>C NMR Spectrum of 33

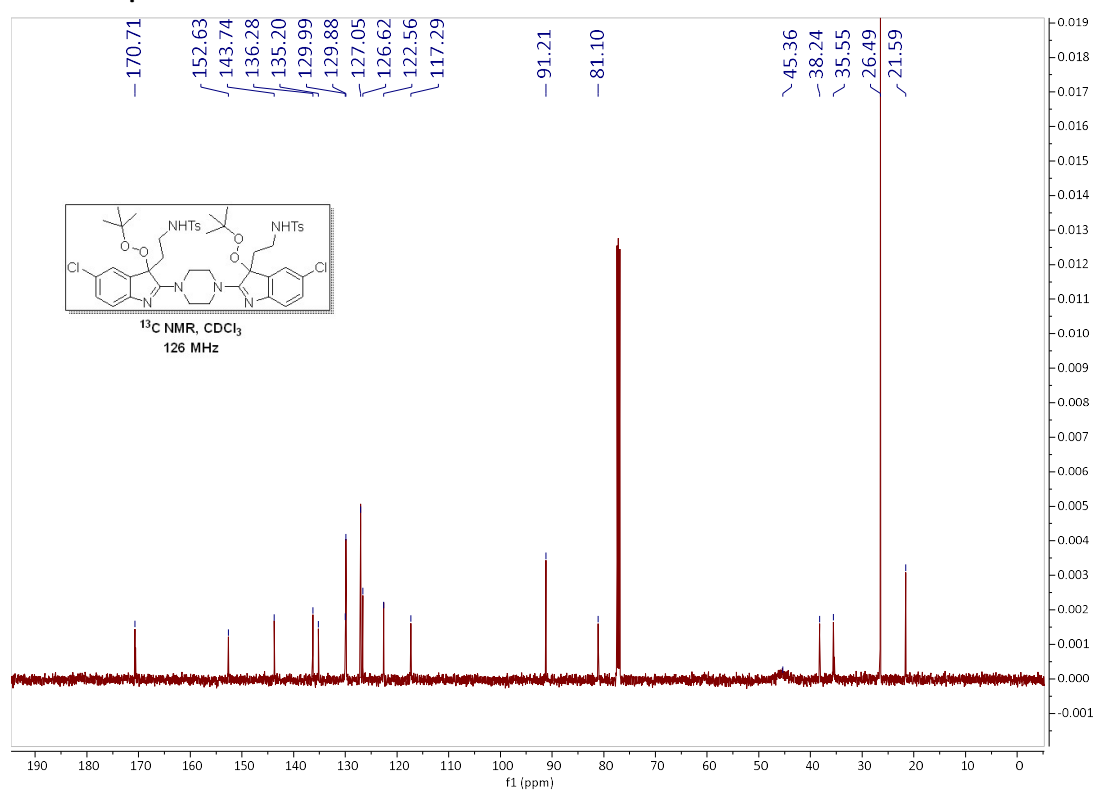

### <sup>1</sup>H NMR Spectrum of 34

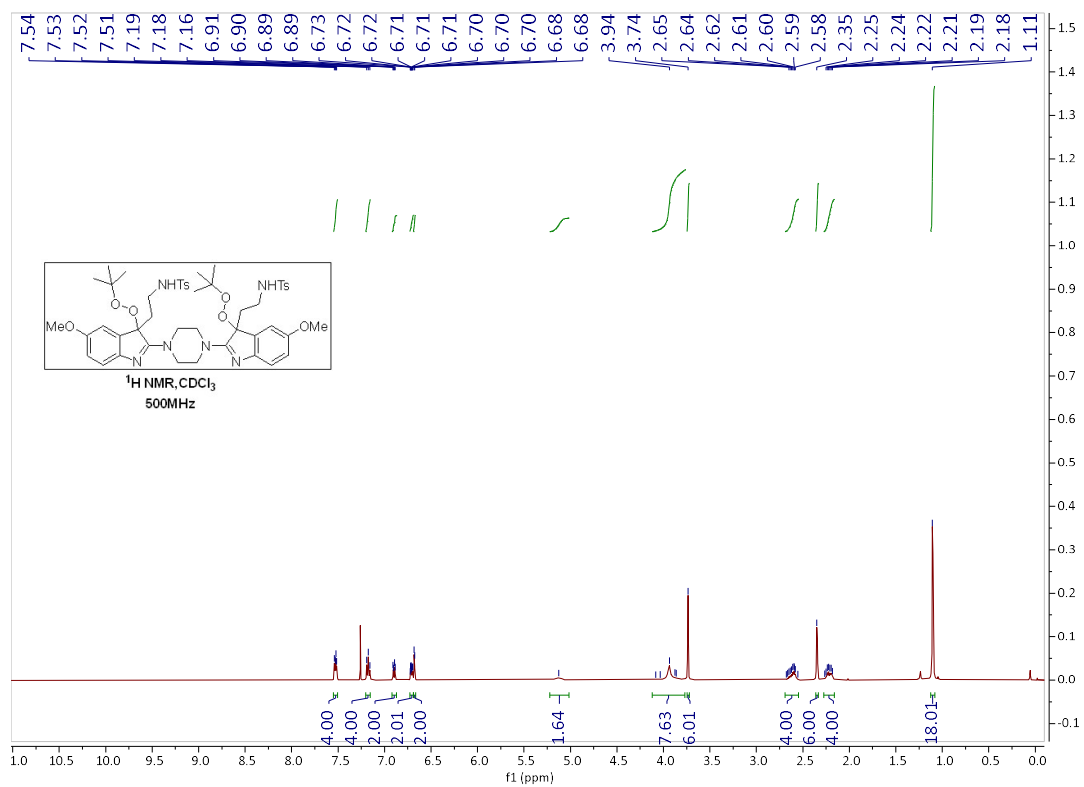

### <sup>13</sup>C NMR Spectrum of 34

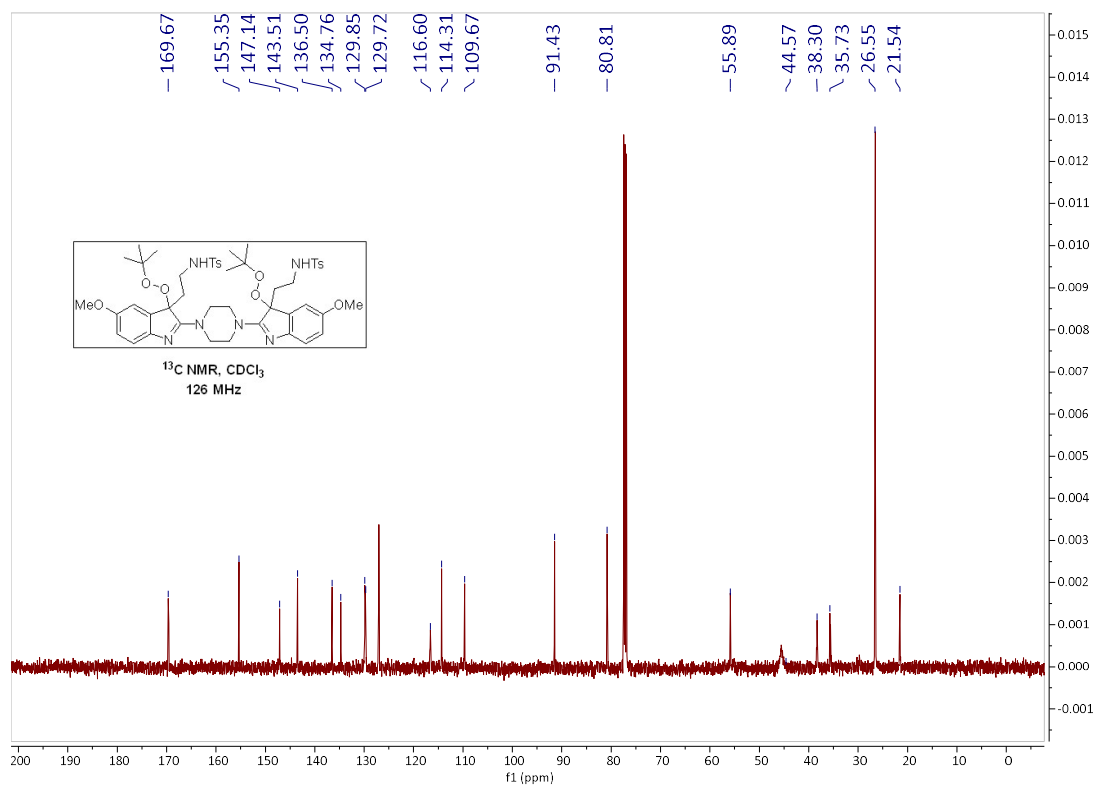



### <sup>1</sup>H NMR Spectrum of 35

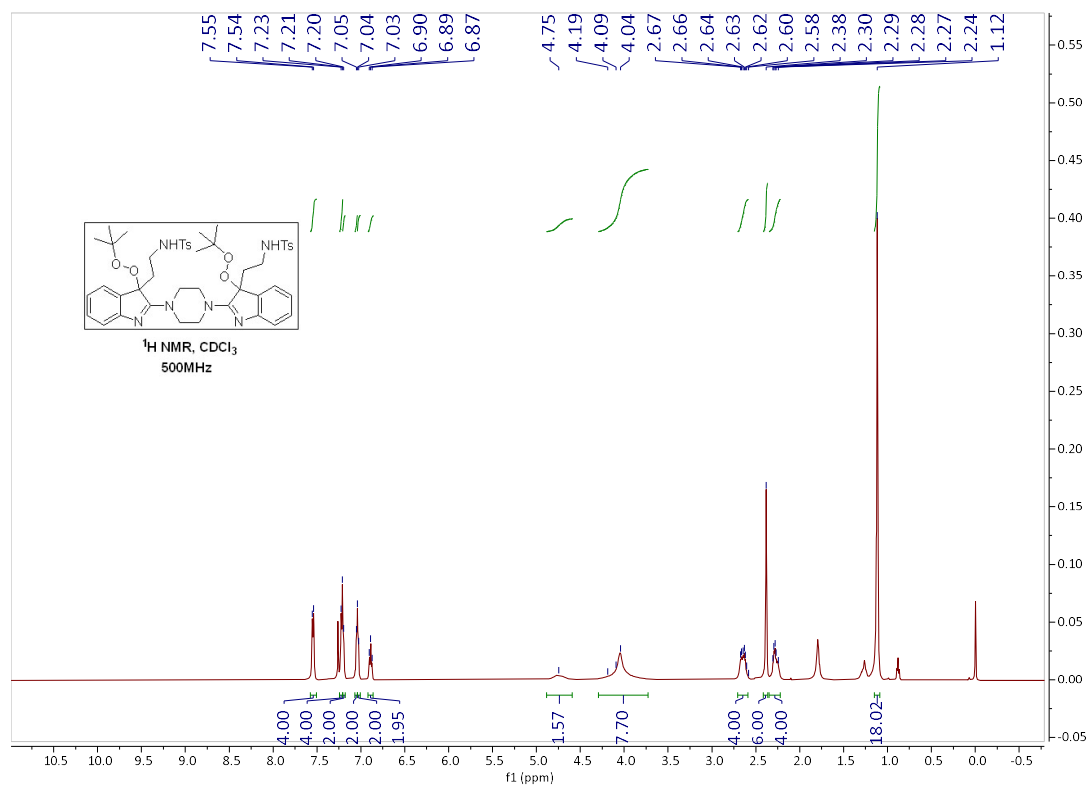

### <sup>13</sup>C NMR Spectrum of 35

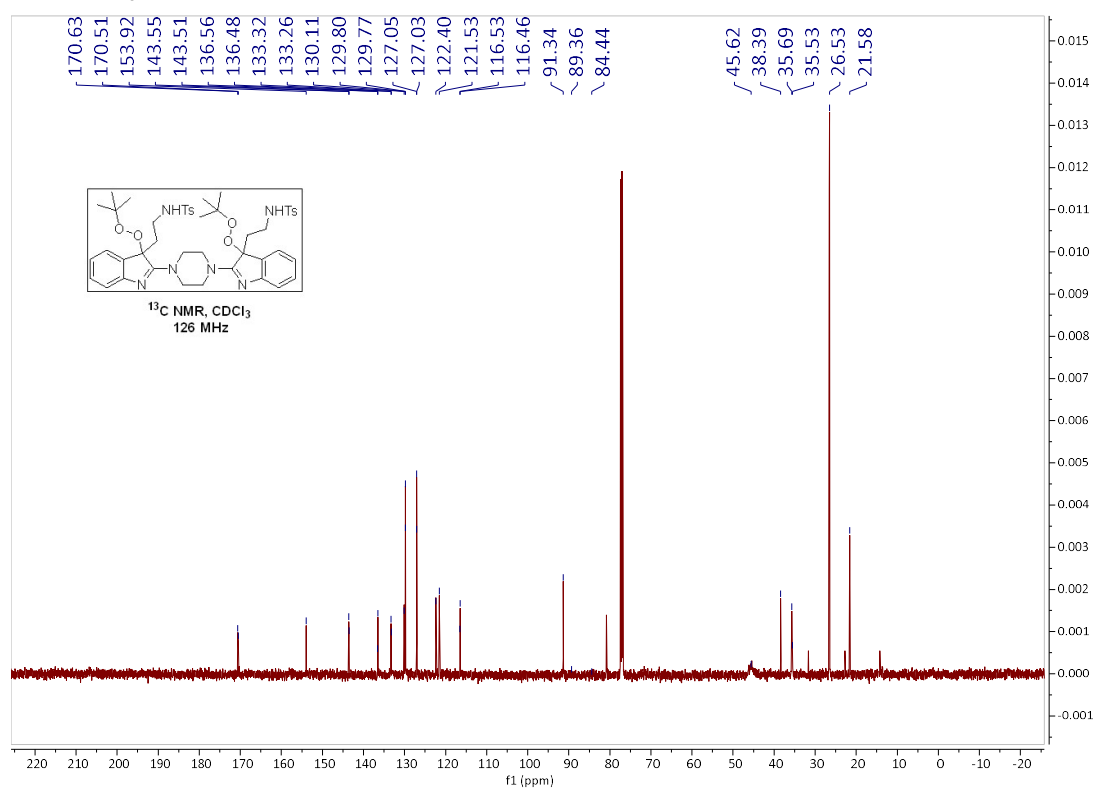

### <sup>1</sup>H NMR Spectrum of 36

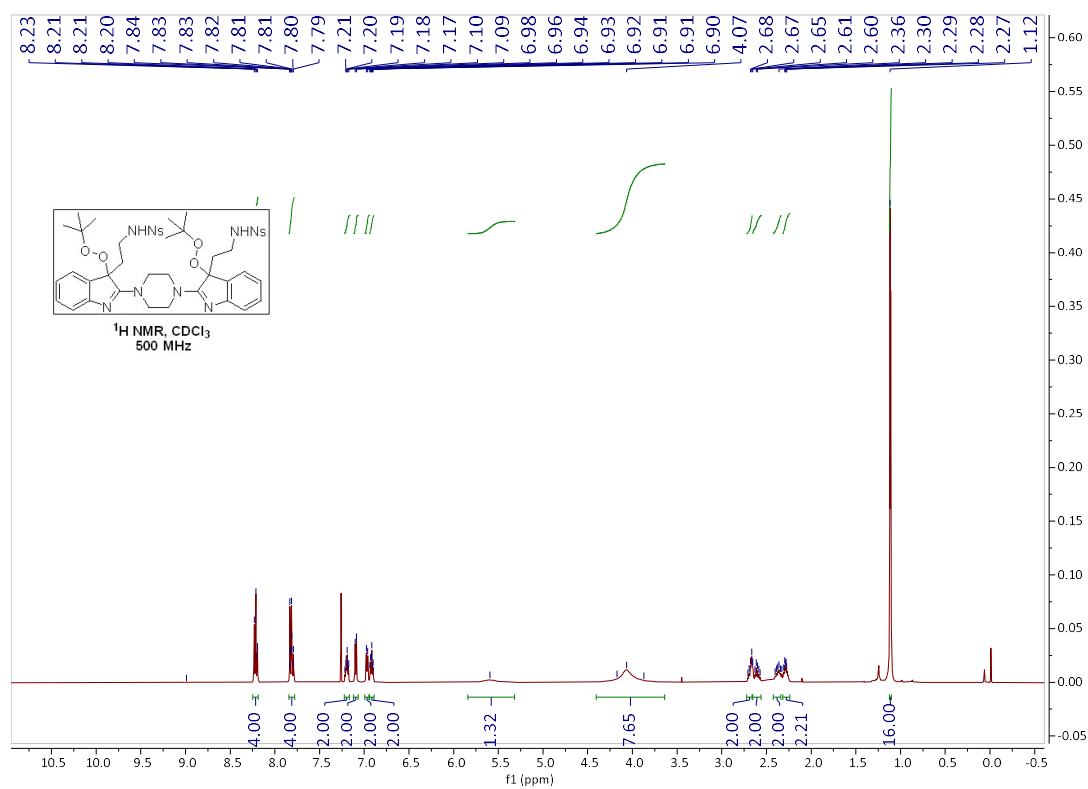

### <sup>13</sup>C NMR Spectrum of 36

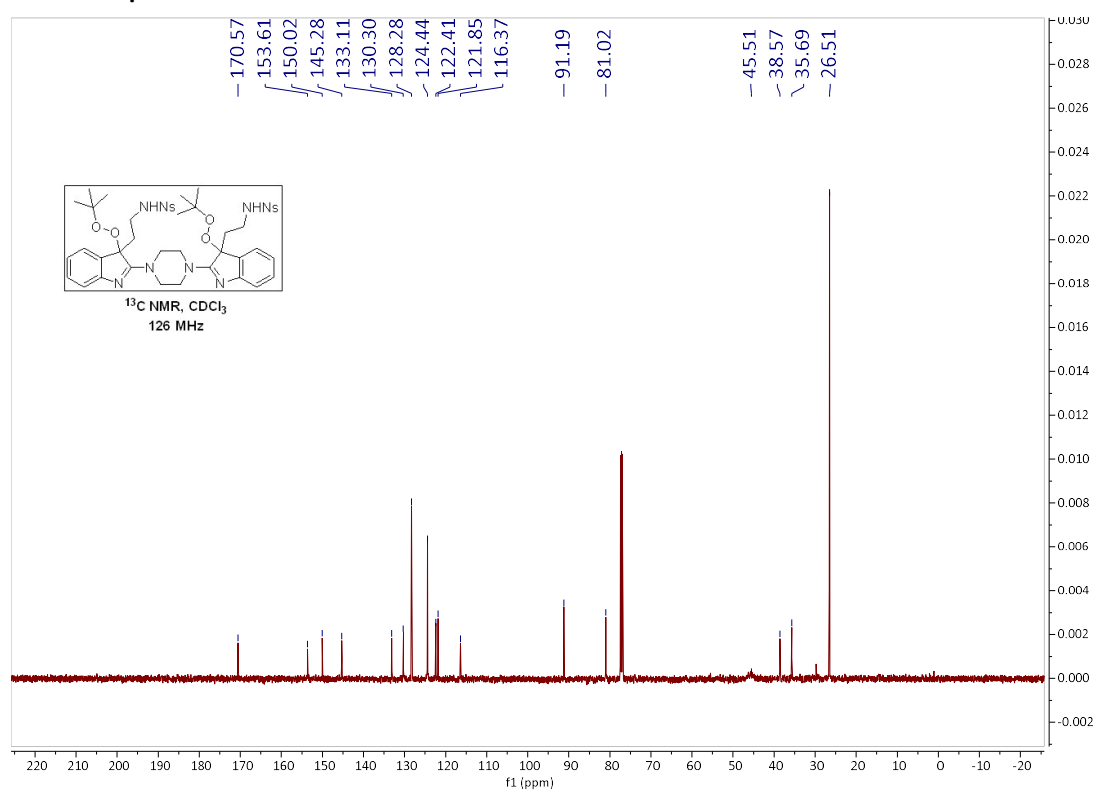

### <sup>1</sup>H NMR Spectrum of 37

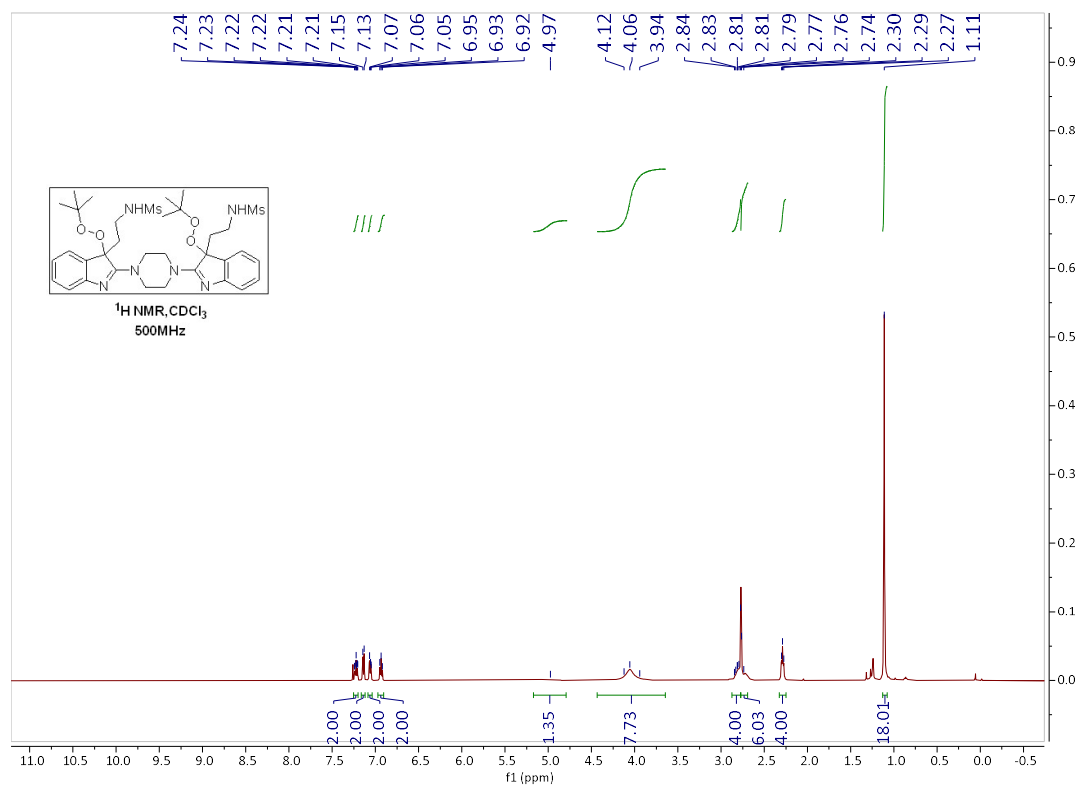

### <sup>13</sup>C NMR Spectrum of 37

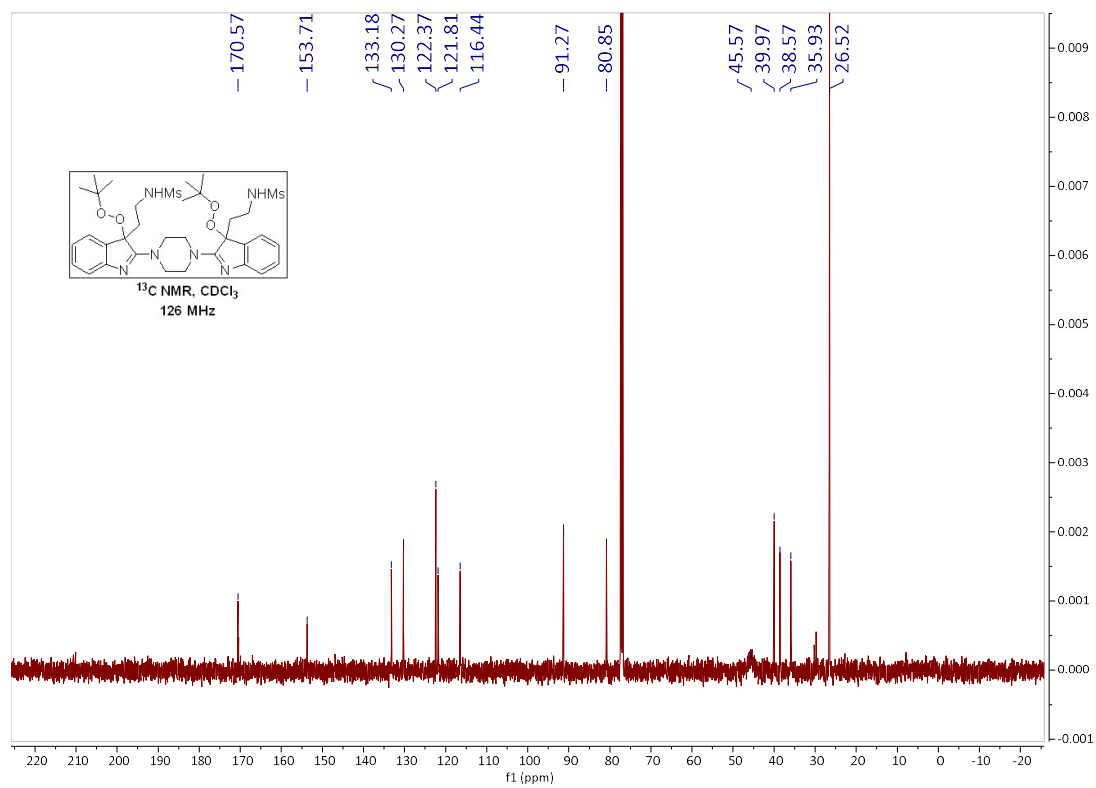

# <sup>1</sup>H NMR Spectrum of 38

Condition a:

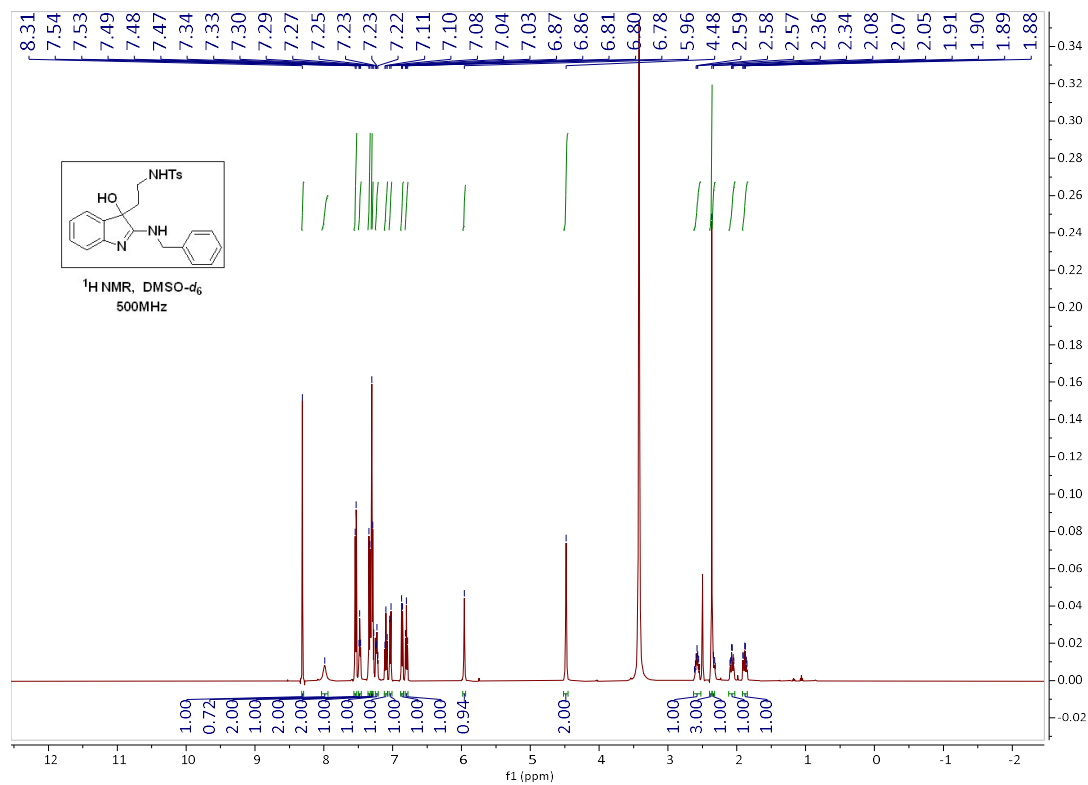

Condition b:

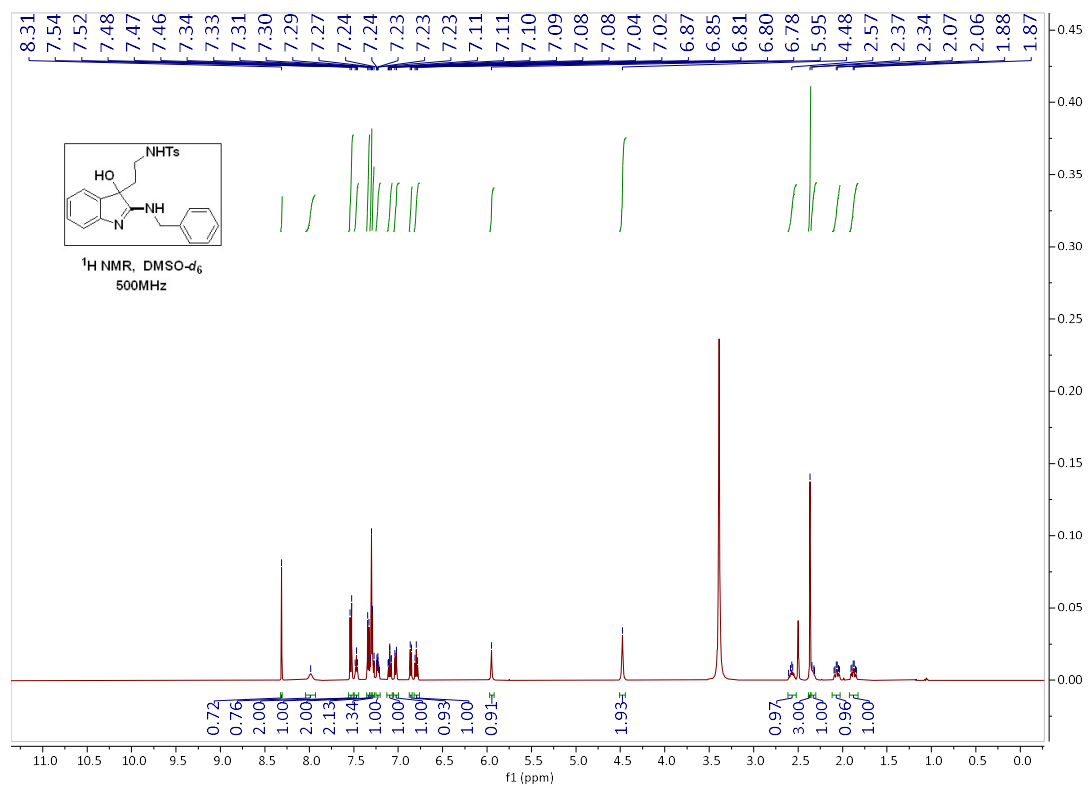

Condition c:

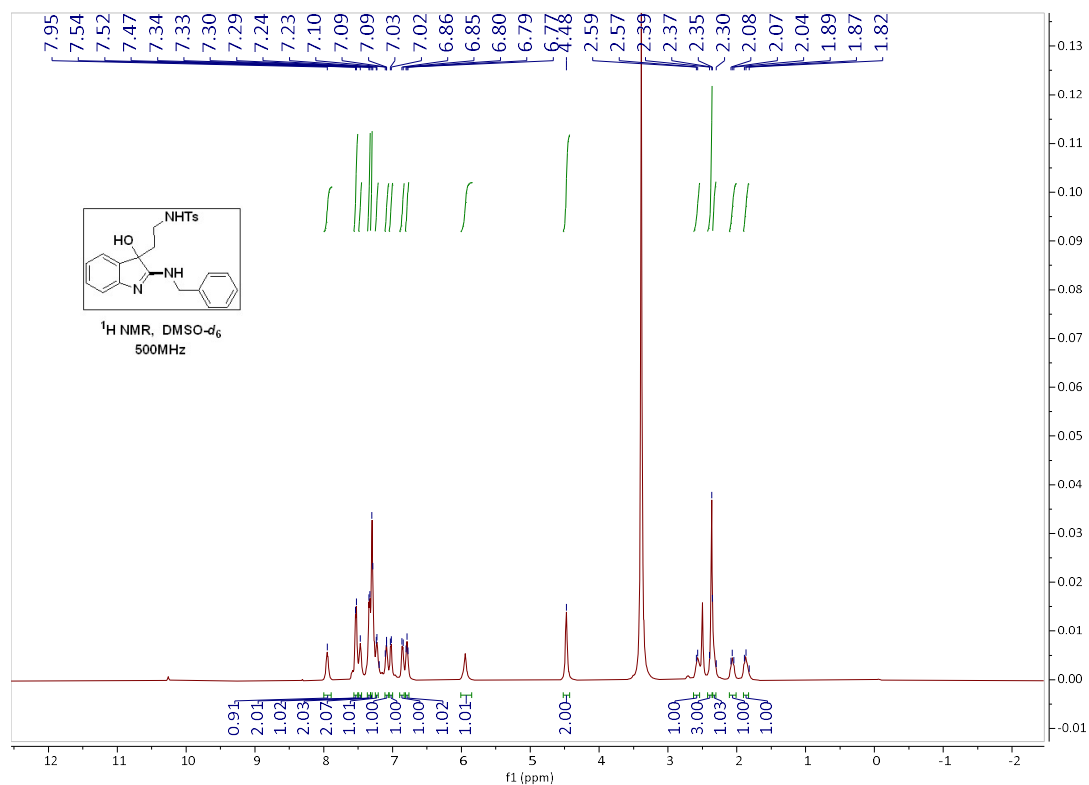

**<sup>13</sup>C NMR Spectrum of 38**

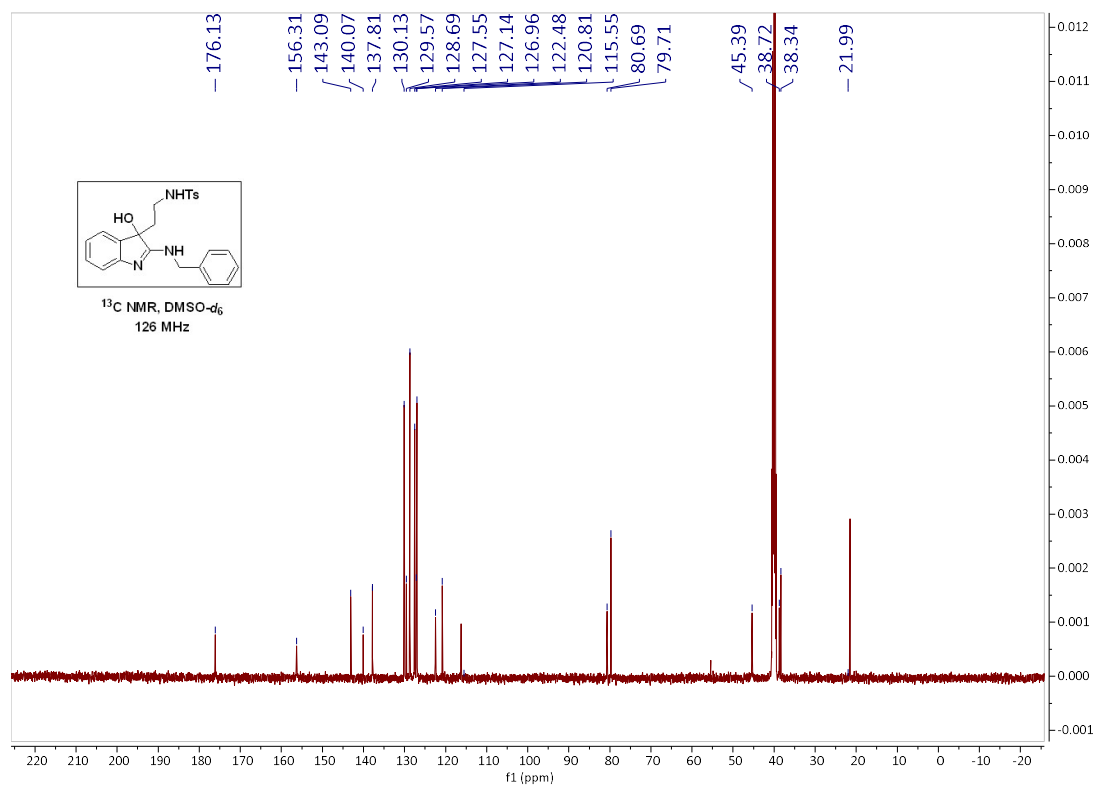

### <sup>1</sup>H NMR Spectrum of peroxyoxindole

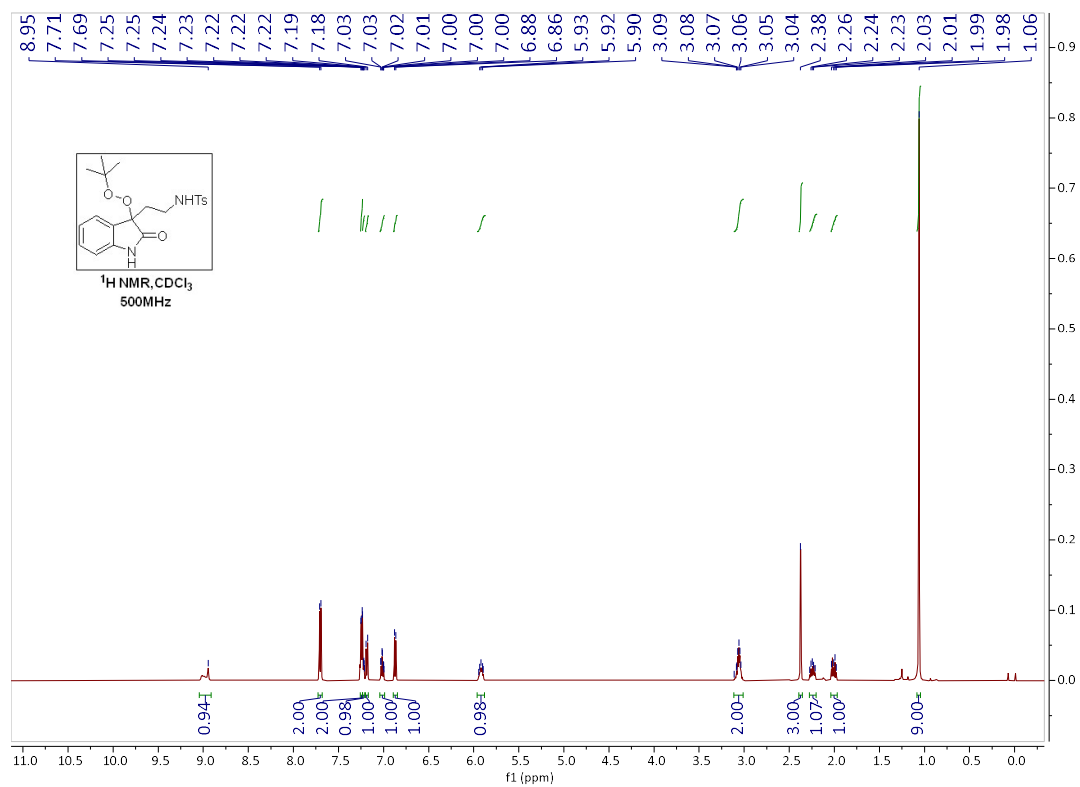

### <sup>13</sup>C NMR Spectrum of peroxyoxindole

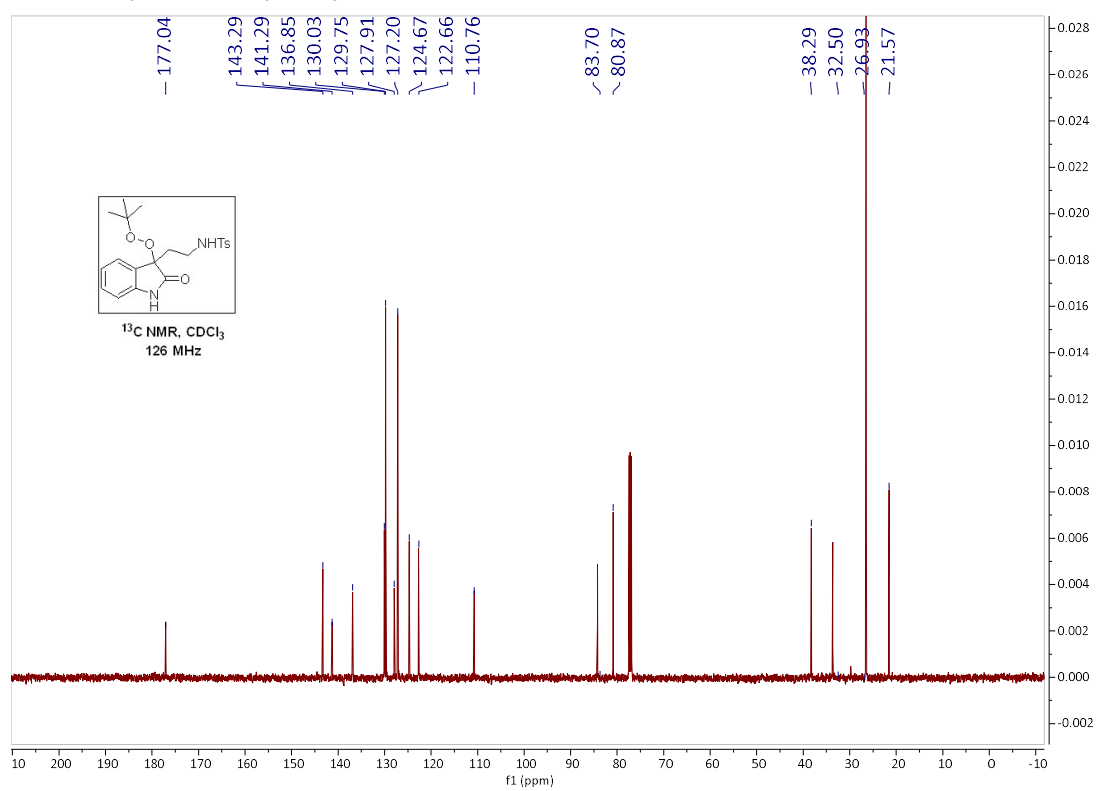

## 7. X-ray Crystal Structure Data

### X-ray Crystal Structure Data for compound 1

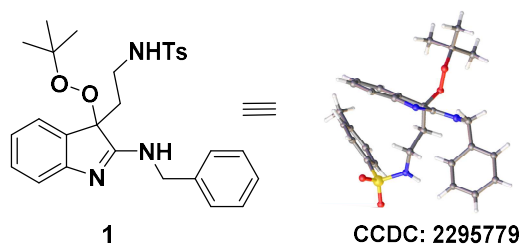

|                        |                                                                           |                                                                 |
|------------------------|---------------------------------------------------------------------------|-----------------------------------------------------------------|
| Identification code    | 1                                                                         |                                                                 |
| Bond precision         | C-C = 0.0055 Å; Wavelength=1.54184                                        |                                                                 |
| Cell                   | a=12.9075(2) b=9.8706(2) c=21.4050(4)<br>alpha=90 beta=94.326(2) gamma=90 |                                                                 |
| Temperature            | 293 K                                                                     |                                                                 |
|                        | Calculated                                                                | Reported                                                        |
| Volume                 | 2719.33(9)                                                                | 2719.33(9)                                                      |
| Space group            | P 21/n                                                                    | P 1 21/n 1                                                      |
| Hall group             | -P 2yn                                                                    | -P 2yn                                                          |
| Moiety formula         | C <sub>28</sub> H <sub>33</sub> N <sub>3</sub> O <sub>4</sub> S           | C <sub>28</sub> H <sub>33</sub> N <sub>3</sub> O <sub>4</sub> S |
| Sum formula            | C <sub>28</sub> H <sub>33</sub> N <sub>3</sub> O <sub>4</sub> S           | C <sub>28</sub> H <sub>33</sub> N <sub>3</sub> O <sub>4</sub> S |
| Mr                     | 507.63                                                                    | 507.63                                                          |
| Dx, g cm <sup>-3</sup> | 1.240                                                                     | 1.240                                                           |
| Z                      | 4                                                                         | 2                                                               |
| Mu (mm <sup>-1</sup> ) | 1.360                                                                     | 1.360                                                           |
| F000                   | 1080.0                                                                    | 1080.0                                                          |
| F000'                  | 1084.36                                                                   | /                                                               |
| h, k, lmax             | 15,11,25                                                                  | 15,11,25                                                        |
| Nref                   | 4808                                                                      | 4786                                                            |
| Tmin, Tmax             | 0.878,0.922                                                               | 0.496,1.000                                                     |
| Tmin'                  | 0.815                                                                     | /                                                               |
| Data Completeness      | 0.995                                                                     |                                                                 |
| Theta(max)             | 66.575                                                                    |                                                                 |
| R(reflections)         | 0.0693 (3919)                                                             |                                                                 |
| wR2(reflections)       | 0.2169 (4786)                                                             |                                                                 |
| S                      | 1.086                                                                     |                                                                 |
| Npar                   | 331                                                                       |                                                                 |
